# Supplementary material
Source: publisher figshare collection journal article supplement (https://acs.figshare.com/ndownloader/files/3893875)

## *Supporting Information*

### **Carboxylic Acid-Catalyzed Highly Efficient and Selective Hydroboration of Alkynes with Pinacolborane**

Hon Eong Ho,<sup>†</sup> Naoki Asao,<sup>†</sup> Yoshinori Yamamoto<sup>†,‡</sup> and Tienan Jin<sup>\*,†</sup>

<sup>†</sup> WPI-Advanced Institute for Materials Research (WPI-AIMR), Tohoku University, Sendai 980-8577, Japan

<sup>‡</sup> State Key Laboratory of Fine Chemicals, Dalian University of Technology, Dalian 116012, China

\*E-mail: [tjin@m.tohoku.ac.jp](mailto:tjin@m.tohoku.ac.jp)

#### **Content**

|                                                               |            |
|---------------------------------------------------------------|------------|
| <b>General Information and Materials</b>                      | <b>S2</b>  |
| <b>Representative procedures for synthesis of 1, 2, and 3</b> | <b>S2</b>  |
| <b>Optimization of catalysts: Tables S1 and S2</b>            | <b>S2</b>  |
| <b>Scheme S1</b>                                              | <b>S4</b>  |
| <b>Analytical data of 1</b>                                   | <b>S4</b>  |
| <b>Analytical data of 2 and 3</b>                             | <b>S7</b>  |
| <b>Analytical data of 4 and 5</b>                             | <b>S13</b> |
| <b>NMR spectra of 1, 2, 3, 4, and 5</b>                       | <b>S15</b> |

**General Information.** GC-MS analysis was performed on an Agilent 6890N GC interfaced to an Agilent 5973 mass-selective detector (30 m x 0.25 mm capillary column, HP-5MS).  $^1\text{H}$  NMR and  $^{13}\text{C}$  NMR spectra were recorded on JEOL JNM AL 400 (400 MHz) spectrometer.  $^1\text{H}$  NMR spectra are reported as follows: chemical shift in ppm ( $\delta$ ) relative to the chemical shift of  $\text{CDCl}_3$  at 7.26 ppm, integration, multiplicities (s = singlet, d = doublet, t = triplet, q = quartet, dt = doublet of triplets, m = multiplet, and br = broadened), and coupling constants (Hz).  $^{13}\text{C}$  NMR spectra were recorded on JEOL JNM AL 400 (100.5 MHz) spectrometers with complete proton decoupling, and chemical shift reported in ppm ( $\delta$ ) relative to the central line of triplet for  $\text{CDCl}_3$  at 77 ppm.  $^{11}\text{B}$  NMR spectra were recorded on JEOL JNM AL 700 (225MHz) spectrometers. High-resolution mass spectra were obtained on a Bruker Daltonics Solarix 9.4T spectrometer and JEOL JMS-T100GCV. Column chromatography was carried out employing silica gel 60 N (spherical, neutral, 40~63  $\mu\text{m}$ , Merck Chemicals). Analytical thin-layer chromatography (TLC) was performed on 0.2 mm precoated plate Kieselgel 60 F254 (Merck). Kugelrohr distillation was performed under vacuum by using Sibata Glass Tube Oven (GTO-250RS).

**Materials.** Pinacolborane (4,4,5,5-tetramethyl-1,3,2-dioxaborolane) (Aldrich), carboxylic acids (Tokyo Chemical Industry), alkynes were purchased and used as received. The structures of new compounds are determined by using  $^1\text{H}$ ,  $^{13}\text{C}$ ,  $^{11}\text{B}$  NMR, and HRMS. The corresponding products, **2a**, **2e**, **3i**, and **3k** of the internal alkynes were determined unambiguously by the reported authentic compounds and the references are shown. Alkynes **1** were prepared following the reported literature from the terminal alkynes precursors.<sup>1</sup> Internal alkynes **3i** and **3l** were prepared by Sonogashira coupling reaction.

#### General procedure for synthesis of 1-alkynyldioxaborolanes, **1**

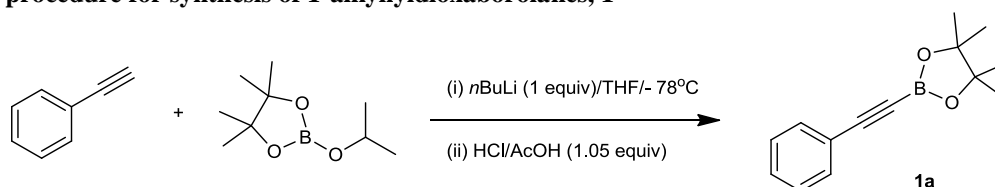

**Synthesis of 4,4,5,5-tetramethyl-2-(phenylethynyl)-1,3,2-dioxaborolane (**1a**).** To a solution of phenylacetylene (0.62 mL, 6 mmol) in THF (0.4 M, 15 mL) in a 50 mL of Schlenk tube -78 °C under an Ar atmosphere was added *n*-BuLi (3.75 mL, 1.6 M hexane solution, 6 mmol). The reaction mixture was stirred for 1 h at -78 °C. A THF solution (0.4 M, 13 mL) of 4,4,5,5-tetramethyl-2-(1-methylethoxy)-1,3,2-dioxaborolane [*i*-PrO)B(pin), 5 mmol] was added to the lithiated reaction mixture at -78 °C. After being stirred for 2 h at -78 °C, the reaction mixture was quenched with 1.0 M HCl/Et<sub>2</sub>O solution (5.25 mL, 5.25 mmol), and the mixture was warmed to room temperature with additional 1 h stirring. Filtration and evaporation afforded pale yellow oil. Bulb to bulb distillation gave **1a** in 98% yield (1.12 g) as a white solid.

#### Representative procedure for carboxylic acid-catalyzed hydroboration of alkynes

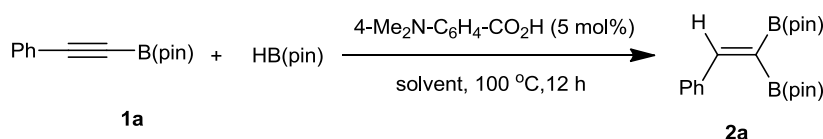

To an octane solution (0.4 mL, 1 M) were added 4,4,5,5-tetramethyl-2-(phenylethynyl)-1,3,2-dioxaborolane (**1a**, 91.2 mg, 0.4 mmol), and 4-(dimethylamino)benzoic acid (3.3 mg, 5 mol%), and pinacol borane (0.29 mL, 2.0 mmol) under an Ar atmosphere. The reaction was stirred at 100 °C for 12 h. After cooling to room temperature, the reaction mixture was concentrated under vacuum. The low-boiling point impurities were removed by Kugelrohr distillation and the residue was further purified by passing through a short silica column chromatography using hexane/ethyl acetate (10/1) as eluents to afford **2a** in 94% (134 mg) as pale yellow oil.

<sup>1</sup> Brown, H. C.; Bhat, N. G.; Srebnik, M.; *Tetrahedron Lett.* **1998**, 29, 2631.

**Table S1. Optimization of various organocatalysts<sup>a</sup>**

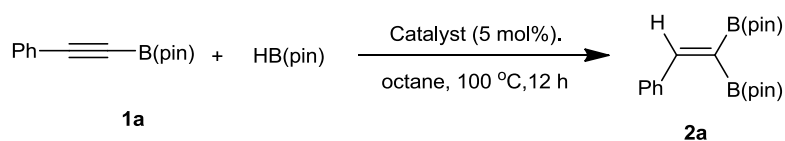

| entry | catalyst (5 mol%)                    | yield of <b>2a</b> (%) <sup>b</sup> |
|-------|--------------------------------------|-------------------------------------|
| 1     | HCOOH                                | 85                                  |
| 2     | AcOH                                 | 94                                  |
| 3     | CF <sub>3</sub> COOH                 | 83                                  |
| 4     | Pivalic acid                         | 79                                  |
| 5     | Adamantane carboxylic acid           | 72                                  |
| 6     | (Ph) <sub>3</sub> CCO <sub>2</sub> H | 79                                  |
| 7     | PhCO <sub>2</sub> H                  | 99 (94)                             |
| 8     | TfOH                                 | 0                                   |
| 9     | H <sub>3</sub> PO <sub>4</sub>       | 50                                  |
| 10    | PPh <sub>3</sub>                     | 0                                   |
| 11    | NaOtBu                               | 0                                   |
| 12    | -                                    | 0                                   |

  

|                                                                                     |                                                                                     |                                                                                      |                                                                                       |
|-------------------------------------------------------------------------------------|-------------------------------------------------------------------------------------|--------------------------------------------------------------------------------------|---------------------------------------------------------------------------------------|
| 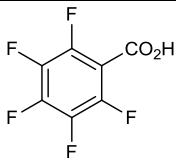  |    |   |    |
| 48%                                                                                 | 72%                                                                                 | 85%                                                                                  | 99%                                                                                   |
|  |  |  |  |
| 99%                                                                                 | 99%                                                                                 | 99 (94), <sup>c</sup> 72 <sup>d</sup>                                                | 82%                                                                                   |
|  |  |   |  |
| 33%                                                                                 | 0%                                                                                  | 0%                                                                                   | 80%                                                                                   |
|  |  |  |  |
| 55%                                                                                 | 14%                                                                                 | 0%                                                                                   | 0%                                                                                    |
|  |  |   |  |
| 10%                                                                                 | 14%                                                                                 | 0%                                                                                   | 0%                                                                                    |

<sup>a</sup> Reaction condition: **1a** (0.4 mmol), HB(pin) (2 mmol), octane (1 M), 100 °C, 12 h. <sup>b</sup> Yield determined by using CH<sub>2</sub>Br<sub>2</sub> as internal standard. Isolated yield is shown in parenthesis. <sup>c</sup> 8 h. <sup>d</sup> 3 mol% of catalyst loading.

**Table S2. Screening of solvents.<sup>a</sup>**

$$\text{Ph}-\text{C}\equiv\text{C}-\text{B}(\text{pin}) + \text{HB}(\text{pin}) \xrightarrow[\text{solvent, 100 } ^\circ\text{C, 12 h}]{4\text{-Me}_2\text{N-C}_6\text{H}_4\text{-CO}_2\text{H (5 mol\%)}} \text{Ph}-\text{C}(\text{H})=\text{C}(\text{B}(\text{pin}))_2$$

| 1a    |               | 2a                           |
|-------|---------------|------------------------------|
| entry | solvent       | yield of 2a (%) <sup>b</sup> |
| 1     | octane        | 99 (94)                      |
| 2     | decane        | 85                           |
| 3     | cyclooctane   | 80                           |
| 4     | toluene       | 37                           |
| 5     | 1,4-dioxane   | 38                           |
| 6     | DCE           | 33                           |
| 7     | ethyl acetate | 40                           |
| 8     | acetonitrile  | 20                           |
| 9     | THF           | 40                           |

<sup>a</sup> Reaction condition: **1a** (0.4 mmol), HBPin (5 equiv), 4-(dimethylamino)benzoic acid (5 mol %), solvent (1 M), 100 °C, 12 h. <sup>b</sup> Yield determined by using CH<sub>2</sub>Br<sub>2</sub> as internal standard. Isolated yield is shown in parenthesis.

**Scheme S1.** Reaction of 5,5-dimethyl-2-(phenylethynyl)-1,3,2-dioxaborinane with HB(pin) under the standard conditions.

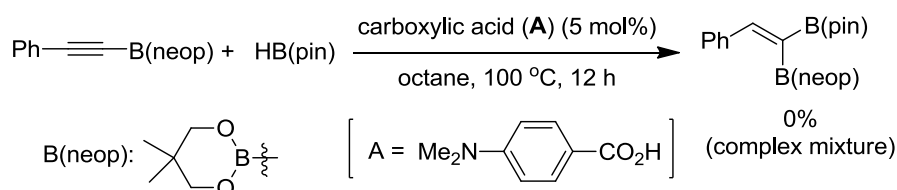

#### Analytical data of alkynes 1.

##### 4,4,5,5-Tetramethyl-2-(phenylethynyl)-1,3,2-dioxaborolane (**1a**)<sup>2</sup>

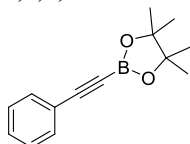

White solid; <sup>1</sup>H NMR (400 MHz, CDCl<sub>3</sub>) δ 7.54-7.51 (m, 2H), 7.38-7.28 (m, 3H), 1.32 (s, 12H); <sup>13</sup>C NMR (100 MHz, CDCl<sub>3</sub>) δ 132.4, 129.3, 128.1, 121.7, 84.4, 24.7. The carbon signals of triple bond were not observed due to low intensity.

##### 4,4,5,5-Tetramethyl-2-(*p*-tolylethynyl)-1,3,2-dioxaborolane (**1b**)

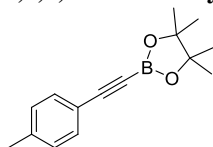

White solid. <sup>1</sup>H NMR (400 MHz, CDCl<sub>3</sub>) δ 7.42 (d, *J* = 8.0 Hz, 2H), 7.11 (d, *J* = 8.0 Hz, 2H), 2.35 (s, 3H), 1.32 (s, 12H); <sup>13</sup>C NMR (100 MHz, CDCl<sub>3</sub>) δ 139.6, 132.4, 128.9, 118.7, 84.3, 24.7, 21.6 (The carbon signals of triple bond were not observed due to low intensity); HRMS (ESI): calcd for C<sub>15</sub>H<sub>19</sub>BO<sub>2</sub> [M+Na]<sup>+</sup>: 265.1370; found 265.1369.

##### 4,4,5,5-Tetramethyl-2-(*m*-tolylethynyl)-1,3,2-dioxaborolane (**1c**)

<sup>2</sup> Takaya, J.; Kirai, N.; Iwasawa, N. *J. Am. Chem. Soc.* **2011**, *133*, 12980.

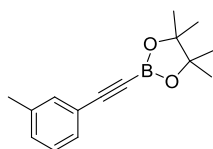

Pale yellow oil.  $^1\text{H}$  NMR (400 MHz,  $\text{CDCl}_3$ )  $\delta$  7.34-7.31 (m, 2H), 7.20-7.15 (m, 2H), 2.30 (s, 3H), 1.31 (s, 12H);  $^{13}\text{C}$  NMR (100 MHz,  $\text{CDCl}_3$ )  $\delta$  137.8, 132.9, 130.1, 129.5, 128.0, 121.5, 101.9, 84.3, 24.7 (The carbon signal attached to B was not observed due to low intensity); HRMS (APCI): calcd for  $\text{C}_{15}\text{H}_{19}\text{BO}_2$   $[\text{M}+\text{H}]$ : 243.1550; found, 243.1550.

#### 4,4,5,5-Tetramethyl-2-(o-tolylethynyl)-1,3,2-dioxaborolane (1d)

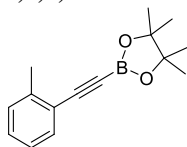

Colorless oil.  $^1\text{H}$  NMR (400 MHz,  $\text{CDCl}_3$ )  $\delta$  7.50 (d,  $J = 7.6$  Hz, 1H), 7.27-7.23 (m, 1H), 7.19-7.10 (m, 2H), 2.48 (s, 3H), 1.33 (s, 12H).  $^{13}\text{C}$  NMR (100 MHz,  $\text{CDCl}_3$ )  $\delta$  141.1, 132.9, 129.3, 129.2, 125.3, 121.6, 100.5, 84.2, 24.7, 20.7 (The carbon signal attached to B was not observed due to low intensity); HRMS (APCI): calcd for  $\text{C}_{15}\text{H}_{19}\text{BO}_2$   $[\text{M}+\text{H}]$ : 243.1550; found, 243.1550.

#### 2-((4-Methoxyphenyl)ethynyl)-4,4,5,5-tetramethyl-1,3,2-dioxaborolane (1e)<sup>3</sup>

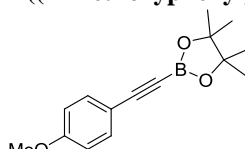

Yellow oil.  $^1\text{H}$  NMR (400 MHz,  $\text{CDCl}_3$ )  $\delta$  7.46 (d,  $J = 9.0$  Hz, 2H), 6.82 (d,  $J = 9.0$  Hz, 2H), 3.80 (s, 3H), 1.31 (s, 12H);  $^{13}\text{C}$  NMR (100 MHz,  $\text{CDCl}_3$ )  $\delta$  160.3, 134.1, 113.8(8), 113.8(1), 102.1, 84.2, 55.2, 24.7 (The carbon signal attached to B was not observed due to low intensity); HRMS (APCI): calcd for  $\text{C}_{15}\text{H}_{19}\text{BO}_3$   $[\text{M}+\text{H}]$ : 259.1500; found, 259.1499.

#### 2-((4-Butylphenyl)ethynyl)-4,4,5,5-tetramethyl-1,3,2-dioxaborolane (1f)

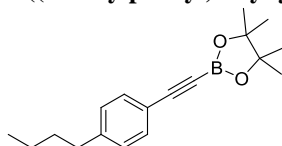

Pale yellow oil.  $^1\text{H}$  NMR (400 MHz,  $\text{CDCl}_3$ )  $\delta$  7.43 (d,  $J = 8.4$  Hz, 2H), 7.11 (d,  $J = 8.4$  Hz, 2H), 2.59 (t,  $J = 7.6$  Hz, 2H), 1.61-1.53 (m, 2H), 1.38-1.27 (m, 14H), 0.91 (t,  $J = 7.2$  Hz, 3H);  $^{13}\text{C}$  NMR (100 MHz,  $\text{CDCl}_3$ )  $\delta$  144.5, 132.4, 131.9, 128.3, 118.8, 102.1, 84.3, 35.6, 33.2, 24.7, 24.6, 22.3, 13.9 (The carbon signal attached to B was not observed due to low intensity); HRMS (APCI): calcd for  $\text{C}_{18}\text{H}_{25}\text{BO}_2$   $[\text{M}+\text{H}]$ : 285.2020, found: 285.2020.

#### 2-((4-Fluorophenyl)ethynyl)-4,4,5,5-tetramethyl-1,3,2-dioxaborolane (1g)

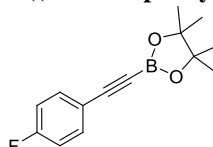

White solid.  $^1\text{H}$  NMR (400 MHz,  $\text{CDCl}_3$ )  $\delta$  7.48-7.44 (m, 2H), 6.99-6.94 (m, 2H), 1.27 (s, 12H);  $^{13}\text{C}$  NMR (100 MHz,  $\text{CDCl}_3$ )  $\delta$  162.8 (d,  $J^1 = 249.1$  Hz), 134.3 (d,  $J^3 = 9.1$  Hz), 117.8 (d,  $J^4 = 3.3$ ), 115.5 (d,  $J^2 = 22.3$ ), 100.4, 84.3, 24.6 (The carbon signal attached to B was not observed due to low intensity); HRMS (APCI): calcd for  $\text{C}_{14}\text{H}_{16}\text{BFO}_2$   $[\text{M}+\text{H}]$ : 247.1300, found: 247.1299.

#### 4,4,5,5-Tetramethyl-2-((4-(trifluoromethyl)phenyl)ethynyl)-1,3,2-dioxaborolane (1h)<sup>4</sup>

<sup>3</sup> Coapes, R. B.; Souza, F. E. S.; Thomas, R. L.; Hall, J. J.; Marder, T. B. *Chem. Commun.* **2003**, 614.

<sup>4</sup> Nishihara, Y.; Miyasaka, M.; Okamoto, M.; Takahashi, H.; Inoue, E.; Tanemura, K.; Takagi, K. *J. Am. Chem. Soc.* **2007**, *129*, 12634.

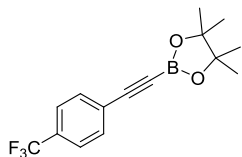

White solid.  $^1\text{H}$  NMR (400 MHz,  $\text{CDCl}_3$ )  $\delta$  7.62 (d,  $J = 8.4$  Hz, 2H), 7.57 (d,  $J = 8.4$  Hz, 2H), 1.33 (s, 12H);  $^{13}\text{C}$  NMR (100 MHz,  $\text{CDCl}_3$ )  $\delta$  132.6, 130.9 (q,  $J^2 = 32.2$  Hz), 125.7, 125.1 (q,  $J^3 = 4.1$  Hz), 123.7 (q,  $J^1 = 270.6$  Hz), 99.7, 84.6, 24.7 (The carbon signal attached to B was not observed due to low intensity); HRMS (APCI): calcd for  $\text{C}_{15}\text{H}_{16}\text{BF}_3$  [M+H]: 297.1268, found: 297.1267.

#### 2-(Biphenyl-4-ylethynyl)-4,4,5,5-tetramethyl-1,3,2-dioxaborolane (1i)

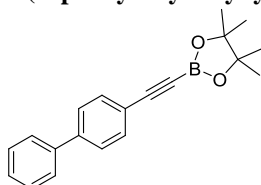

Brown solid.  $^1\text{H}$  NMR (400 MHz,  $\text{CDCl}_3$ )  $\delta$  7.61-7.53 (m, 6H), 7.46-7.42 (m, 2H), 7.38-7.34 (m, 1H), 1.34 (s, 12H);  $^{13}\text{C}$  NMR (100 MHz,  $\text{CDCl}_3$ )  $\delta$  142.0, 140.0, 132.9, 132.4, 128.7, 127.7, 126.9(8), 126.9(0), 120.5, 101.68, 84.4, 24.7 (The carbon signal attached to B was not observed due to low intensity); HRMS (APCI): calcd for  $\text{C}_{20}\text{H}_{21}\text{BO}_2$  [M+H]: 305.1707, found: 305.1707.

#### 4,4,5,5-Tetramethyl-2-(naphthalen-1-ylethynyl)-1,3,2-dioxaborolane (1j)

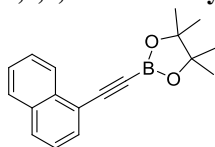

Yellow solid.  $^1\text{H}$  NMR (400 MHz,  $\text{CDCl}_3$ )  $\delta$  8.42 (d,  $J = 8.0$  Hz, 1H), 7.85 (t,  $J = 9.2$  Hz, 2H), 7.79 (dd,  $J = 7.2$ , 1.2 Hz, 1H), 7.59-7.49 (m, 2H), 7.41 (dd,  $J = 8.0$ , 7.2 Hz, 1H), 1.37 (s, 12H);  $^{13}\text{C}$  NMR (100 MHz,  $\text{CDCl}_3$ )  $\delta$  133.4, 132.8, 132.0, 129.8, 128.1, 126.9, 126.4, 126.2, 124.9, 119.4, 99.6, 84.4, 24.7 (The carbon signal attached to B was not observed due to low intensity); HRMS (APCI): calcd for  $\text{C}_{18}\text{H}_{19}\text{BO}_2$  [M+H]: 279.1550, found: 279.1550.

#### 4,4,5,5-Tetramethyl-2-(thiophen-2-ylethynyl)-1,3,2-dioxaborolane (1k)

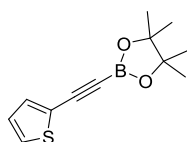

Brown solid.  $^1\text{H}$  NMR (400 MHz,  $\text{CDCl}_3$ )  $\delta$  7.34 (d,  $J = 3.6$  Hz, 1H), 7.30 (d,  $J = 5.2$  Hz, 1H), 6.97 (dd,  $J = 5.2$ , 3.6 Hz, 1H), 1.32 (s, 12H);  $^{13}\text{C}$  NMR (100 MHz,  $\text{CDCl}_3$ )  $\delta$  134.4, 128.8, 126.9, 121.7, 84.5, 24.7 (The carbon signals of triple bond were not observed due to low intensity); HRMS (APCI): calcd for  $\text{C}_{12}\text{H}_{15}\text{BO}_2\text{S}$  [M+H]: 235.0958, found: 235.0957.

#### 2-(Cyclohexenylethynyl)-4,4,5,5-tetramethyl-1,3,2-dioxaborolane (1l)

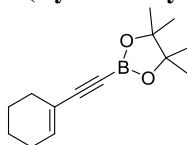

Yellow oil.  $^1\text{H}$  NMR (400 MHz,  $\text{CDCl}_3$ )  $\delta$  6.29-6.27 (m, 1H), 2.13-2.05 (m, 4H), 1.61-1.53 (m, 4H), 1.26 (s, 12H);  $^{13}\text{C}$  NMR (100 MHz,  $\text{CDCl}_3$ )  $\delta$  138.8, 119.9, 104.0, 84.0, 28.5, 25.7, 24.6, 22.0, 21.3 (The carbon signal attached to B was not observed due to low intensity); HRMS (APCI): calcd for  $\text{C}_{14}\text{H}_{21}\text{BO}_2$  [M+H]: 233.1707, found: 233.1706.

#### 2-(Hept-1-ynyl)-4,4,5,5-tetramethyl-1,3,2-dioxaborolane (1m)

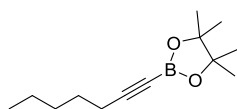

Colorless oil.  $^1\text{H}$  NMR (400 MHz,  $\text{CDCl}_3$ )  $\delta$  2.24 (t,  $J = 7.2$  Hz, 2H), 1.58-1.49 (m, 2H), 1.38-1.28 (m, 4H), 1.26 (s, 12H), 0.88 (t,  $J = 7.2$  Hz, 3H);  $^{13}\text{C}$  NMR (100 MHz,  $\text{CDCl}_3$ )  $\delta$  105.2, 83.9, 31.0, 27.8, 24.7, 22.2, 19.5, 13.9 (The carbon signal attached to B was not observed due to low intensity); HRMS (APCI): calcd for  $\text{C}_{13}\text{H}_{23}\text{BO}_2$   $[\text{M}+\text{H}]$ : 223.1863, found: 223.1863.

#### 2-(Cyclohexylethynyl)-4,4,5,5-tetramethyl-1,3,2-dioxaborolane (1n)

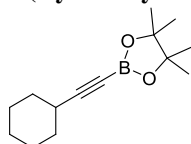

White solid.  $^1\text{H}$  NMR (400 MHz,  $\text{CDCl}_3$ )  $\delta$  2.44-2.39 (m, 1H), 1.83-1.79 (m, 2H), 1.74-1.67 (m, 2H), 1.56-1.39 (m, 3H), 1.28-1.26 (m, 14H);  $^{13}\text{C}$  NMR (100 MHz,  $\text{CDCl}_3$ )  $\delta$  83.9, 32.0, 29.7, 25.7, 24.8, 24.7 (The carbon signals of triple bond were not observed due to low intensity); HRMS (APCI): calcd for  $\text{C}_{14}\text{H}_{21}\text{BO}_2$   $[\text{M}+\text{H}]$ : 235.1863, found: 235.1863.

#### 4,4,5,5-Tetramethyl-2-(3-(tetrahydro-2H-pyran-2-yloxy)prop-1-ynyl)-1,3,2-dioxaborolane (1o)

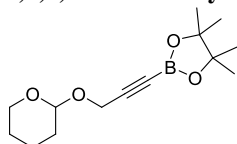

Pale yellow oil.  $^1\text{H}$  NMR (400 MHz,  $\text{CDCl}_3$ )  $\delta$  4.81 (t,  $J = 3.2$  Hz, 1H), 4.28 (d,  $J = 3.2$  Hz, 2H), 3.83-3.77 (m, 1H), 3.54-3.48 (m, 1H), 1.84-1.70 (m, 2H), 1.69-1.48 (m, 2H), 1.26 (s, 12H);  $^{13}\text{C}$  NMR (100 MHz,  $\text{CDCl}_3$ )  $\delta$  98.9, 96.5, 84.3, 61.8, 54.1, 30.1, 25.3, 24.6, 18.9 (The carbon signal attached to B was not observed due to low intensity); HRMS (APCI): calcd for  $\text{C}_{14}\text{H}_{23}\text{BO}_4$   $[\text{M}+\text{Na}]$ : 289.1581, found: 289.1581.

#### 1,7-Bis(4,4,5,5-tetramethyl-1,3,2-dioxaborolan-2-yl)hepta-1,6-diyne (1p)

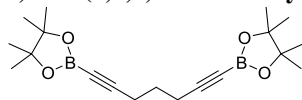

White solid.  $^1\text{H}$  NMR (400 MHz,  $\text{CDCl}_3$ )  $\delta$  2.39 (t,  $J = 6.8$  Hz, 4H), 1.76 (m, 2H), 1.26 (s, 12H).  $^{13}\text{C}$  NMR (100 MHz,  $\text{CDCl}_3$ )  $\delta$  103.4, 84.0, 26.6, 24.7, 18.7 (The carbon signal attached to B was not observed due to low intensity); HRMS (APCI): calcd for  $\text{C}_{22}\text{H}_{28}\text{B}_2\text{O}_4$   $[\text{M}+\text{H}]$ : 345.2403, found: 345.2402.

#### Analytical data of products 2 and 3

##### 2,2'-(2-Phenylethene-1,1-diyl)bis(4,4,5,5-tetramethyl-1,3,2-dioxaborolane) (2a)<sup>5</sup>

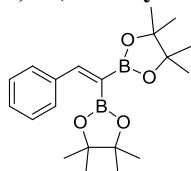

Colorless oil (134 mg, 94%).  $^1\text{H}$  NMR (400 MHz,  $\text{CDCl}_3$ )  $\delta$  7.70 (s, 1H), 7.48-7.46 (m, 2H), 7.30-7.23 (m, 3H), 1.30 (s, 12H), 1.26 (s, 12H);  $^{13}\text{C}$  NMR (100 MHz,  $\text{CDCl}_3$ )  $\delta$  155.0, 139.4, 128.3, 128.0, 127.9, 83.5, 83.1, 24.9, 24.6 (The carbon signal attached to B was not observed due to low intensity);  $^{11}\text{B}$  NMR ( $\text{CDCl}_3$ , 225 MHz, rt)  $\delta$  32.17, 30.62; HRMS (ESI): calcd for  $\text{C}_{20}\text{H}_{30}\text{B}_2\text{O}_4$   $[\text{M}+\text{Na}]$ : 379.2222, found: 379.2221.

##### 2,2'-(2-*p*-Tolylene-1,1-diyl)bis(4,4,5,5-tetramethyl-1,3,2-dioxaborolane) (2b)

<sup>5</sup> Takaya, J.; Kirai, N.; Iwasawa, N. *J. Am. Chem. Soc.* **2011**, *133*, 12980.

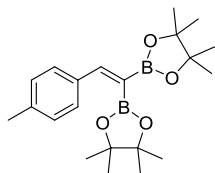

Colorless oil (130.3 mg, 88%).  $^1\text{H}$  NMR (400 MHz,  $\text{CDCl}_3$ )  $\delta$  7.67 (s, 1H), 7.38 (d,  $J$  = 8.0 Hz, 2H), 7.09 (d,  $J$  = 8.0 Hz, 2H), 2.33 (s, 3H), 1.32 (s, 12H), 1.27 (s, 12H).  $^{13}\text{C}$  NMR (100 MHz,  $\text{CDCl}_3$ )  $\delta$  155.0, 138.3, 136.7, 128.7, 128.1, 83.5, 83.0, 24.9, 24.7, 21.3 (The carbon signal attached to B was not observed due to low intensity);  $^{11}\text{B}$  NMR ( $\text{CDCl}_3$ , 225 MHz, rt)  $\delta$  32.35, 30.79; HRMS (ESI) calcd for  $\text{C}_{21}\text{H}_{32}\text{B}_2\text{O}_4$  [ $\text{M}+\text{Na}$ ]: 393.2378, found: 393.2378.

**2,2'-(2-*m*-Tolylethene-1,1-diyl)bis(4,4,5,5-tetramethyl-1,3,2-dioxaborolane) (2c)**

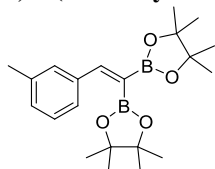

Colorless oil (124.4 mg, 84%).  $^1\text{H}$  NMR (400 MHz,  $\text{CDCl}_3$ )  $\delta$  7.69 (s, 1H), 7.33 (s, 1H), 7.27 (d,  $J$  = 7.6 Hz, 1H), 7.18 (t,  $J$  = 7.6 Hz, 1H), 7.07 (d,  $J$  = 7.6 Hz, 1H), 2.32 (s, 3H), 1.32 (s, 12H), 1.28 (s, 12H);  $^{13}\text{C}$  NMR (100 MHz,  $\text{CDCl}_3$ )  $\delta$  155.1, 139.4, 137.4, 129.1, 128.3, 127.9, 125.4, 83.4, 83.0, 24.8, 24.6, 21.3 (The carbon signal attached to B was not observed due to low intensity);  $^{11}\text{B}$  NMR ( $\text{CDCl}_3$ , 225 MHz, rt)  $\delta$  32.67, 30.64; HRMS (ESI): calcd for  $\text{C}_{21}\text{H}_{32}\text{B}_2\text{O}_4$  [ $\text{M}+\text{Na}$ ]: 393.2378, found: 393.2378.

**2,2'-(2-*o*-Tolylethene-1,1-diyl)bis(4,4,5,5-tetramethyl-1,3,2-dioxaborolane) (2d)**

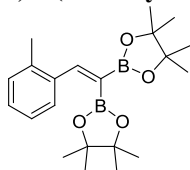

Colorless oil (125.9 mg, 85%).  $^1\text{H}$  NMR (400 MHz,  $\text{CDCl}_3$ )  $\delta$  7.89 (s, 1H), 7.45 (d,  $J$  = 7.2 Hz, 1H), 7.18-7.08 (m 3H), 2.35 (s, 3H), 1.28 (s, 12H), 1.24 (s, 12H);  $^{13}\text{C}$  NMR (100 MHz,  $\text{CDCl}_3$ )  $\delta$  153.9, 139.0, 136.1, 129.6, 128.1, 127.5, 125.3, 83.3, 83.0, 24.8, 24.5, 19.7 (The carbon signal attached to B was not observed due to low intensity);  $^{11}\text{B}$  NMR ( $\text{CDCl}_3$ , 225 MHz, rt)  $\delta$  32.09, 30.53; HRMS (ESI): calcd for  $\text{C}_{21}\text{H}_{32}\text{B}_2\text{O}_5$  [ $\text{M}+\text{Na}$ ]: 393.2378, found: 393.2378.

**2,2'-(2-(4-Methoxyphenyl)ethene-1,1-diyl)bis(4,4,5,5-tetramethyl-1,3,2-dioxaborolane) (2e)<sup>6</sup>**

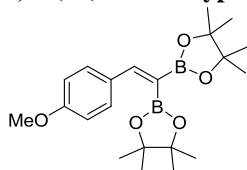

Pale yellow oil (128.2 mg, 83%).  $^1\text{H}$  NMR (400 MHz,  $\text{CDCl}_3$ )  $\delta$  7.65 (s, 1H), 7.44 (d,  $J$  = 8.4 Hz, 2H), 6.81 (d,  $J$  = 8.4 Hz, 2H), 3.79 (s, 3H), 1.32 (s, 12H), 1.27 (s, 12H);  $^{13}\text{C}$  NMR (100 MHz,  $\text{CDCl}_3$ )  $\delta$  159.8, 154.6, 132.3, 129.6, 113.4, 83.4, 82.9, 55.2, 24.8, 24.7 (The carbon signal attached to B was not observed due to low intensity);  $^{11}\text{B}$  NMR ( $\text{CDCl}_3$ , 225 MHz, rt)  $\delta$  32.48, 30.89; HRMS (ESI): calcd for  $\text{C}_{21}\text{H}_{32}\text{B}_2\text{O}_5$  [ $\text{M}+\text{Na}$ ]: 409.2328, found: 409.2327.

**2,2'-(2-(4-Butylphenyl)ethene-1,1-diyl)bis(4,4,5,5-tetramethyl-1,3,2-dioxaborolane) (2f)**

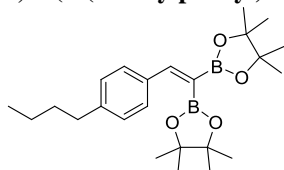

Pale yellow oil (135.2 mg, 82%).  $^1\text{H}$  NMR (400 MHz,  $\text{CDCl}_3$ )  $\delta$  7.68 (s, 1H), 7.40 (d,  $J$  = 8.0 Hz, 2H), 7.10 (d,  $J$  = 8.0 Hz, 2H), 2.58 (t,  $J$  = 7.6 Hz, 2H), 1.62-1.54 (m, 2H), 1.33-1.31 (s, 14H), 1.27 (s, 12H), 0.91 (t,  $J$  = 7.6

<sup>6</sup> Coapes, R. B.; Souza, F. E. S.; Thomas, R. L.; Hall, J. J.; Marder, T. B. *Chem. Commun.* **2003**, 614.



Hz, 3H);  $^{13}\text{C}$  NMR (100 MHz,  $\text{CDCl}_3$ )  $\delta$  155.0, 143.3, 136.8, 128.0, 127.8, 83.4, 83.0, 35.4, 33.4, 24.8, 24.6, 22.3, 13.9 (The carbon signal attached to B was not observed due to low intensity);  $^{11}\text{B}$  NMR ( $\text{CDCl}_3$ , 225 MHz, rt)  $\delta$  32.59, 31.11; HRMS (ESI): calcd for  $\text{C}_{24}\text{H}_{38}\text{B}_2\text{O}_4$   $[\text{M}+\text{Na}]$ : 435.2848, found: 435.2847.

**2,2'-(2-(4-Fluorophenyl)ethene-1,1-diyl)bis(4,4,5,5-tetramethyl-1,3,2-dioxaborolane) (2g)**

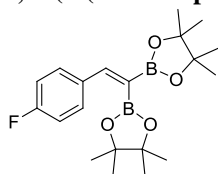

Pale yellow oil (136.2 mg, 91%).  $^1\text{H}$  NMR (400 MHz,  $\text{CDCl}_3$ )  $\delta$  7.65 (s, 1H), 7.49-7.44 (m, 2H), 6.99-6.95 (m, 2H), 1.30 (s, 12H), 1.27 (s, 12H);  $^{13}\text{C}$  NMR (100 MHz,  $\text{CDCl}_3$ )  $\delta$  162.6 (d,  $J^1 = 246.7$  Hz), 153.6, 135.7 (d,  $J^4 = 3.3$  Hz), 129.7 (d,  $J^3 = 8.3$  Hz), 114.9 (d,  $J^2 = 21.5$  Hz), 83.6, 83.2, 24.8, 24.6 (The carbon signal attached to B was not observed due to low intensity);  $^{11}\text{B}$  NMR ( $\text{CDCl}_3$ , 225 MHz, rt)  $\delta$  30.84; HRMS (ESI): calcd for  $\text{C}_{20}\text{H}_{29}\text{B}_2\text{FO}_4$   $[\text{M}+\text{Na}]$ : 397.2128, found: 397.2128.

**2,2'-(2-(4-(Trifluoromethyl)phenyl)ethene-1,1-diyl)bis(4,4,5,5-tetramethyl-1,3,2-dioxaborolane) (2h)**

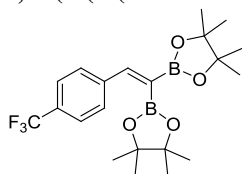

Pale yellow oil (140.8 mg, 83%).  $^1\text{H}$  NMR (400 MHz,  $\text{CDCl}_3$ )  $\delta$  7.70 (s, 1H), 7.59-7.53 (m, 4H), 1.31 (s, 12H), 1.28 (s, 12H);  $^{13}\text{C}$  NMR (100 MHz,  $\text{CDCl}_3$ )  $\delta$  152.9, 142.8, 129.9 (q,  $J^2 = 32.2$  Hz), 128.5, 125.0 (q,  $J^3 = 4.0$  Hz), 124.0 (q,  $J^1 = 276$  Hz), 83.8, 83.4, 24.9, 24.6 (The carbon signal attached to B was not observed due to low intensity);  $^{11}\text{B}$  NMR ( $\text{CDCl}_3$ , 225 MHz, rt)  $\delta$  31.54; HRMS (ESI): calcd for  $\text{C}_{20}\text{H}_{29}\text{B}_2\text{FO}_4$   $[\text{M}+\text{Na}]$ : 447.2096, found: 447.2096.

**2,2'-(2-(Biphenyl-4-yl)ethene-1,1-diyl)bis(4,4,5,5-tetramethyl-1,3,2-dioxaborolane) (2i)**

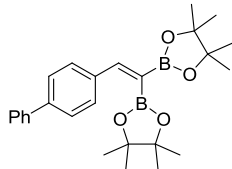

Yellow oil (155.6 mg, 90%).  $^1\text{H}$  NMR (400 MHz,  $\text{CDCl}_3$ )  $\delta$  7.76 (s, 1H), 7.62-7.54 (m, 6H), 7.43 (t,  $J = 7.2$  Hz, 2H), 7.36-7.32 (m, 1H), 1.35 (s, 12H), 1.30 (s, 12H);  $^{13}\text{C}$  NMR (100 MHz,  $\text{CDCl}_3$ )  $\delta$  154.4, 141.0, 138.4, 132.4, 128.6, 128.5, 127.2, 126.9, 126.7, 83.6, 83.1, 24.9, 24.7. The carbon signal attached to B was not observed due to low intensity;  $^{11}\text{B}$  NMR ( $\text{CDCl}_3$ , 225 MHz, rt)  $\delta$  30.71; HRMS (ESI): calcd for  $\text{C}_{26}\text{H}_{34}\text{B}_2\text{O}_4$   $[\text{M}+\text{Na}]$ : 307.1863, found: 307.1863.

**2,2'-(2-(Naphthalen-1-yl)ethene-1,1-diyl)bis(4,4,5,5-tetramethyl-1,3,2-dioxaborolane) (2j)**

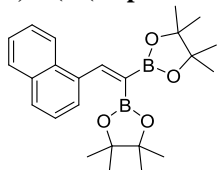

White solid. (123.5 mg, 76%).  $^1\text{H}$  NMR (400 MHz,  $\text{CDCl}_3$ )  $\delta$  8.40 (s, 1H), 8.12 (d,  $J = 7.2$  Hz, 1H), 7.83-7.76 (m, 2H), 7.62 (d,  $J = 7.2$  Hz, 1H), 7.50-7.40 (m, 2H), 7.37 (t,  $J = 7.6$  Hz, 1H), 1.32 (s, 12H), 1.17 (s, 12H);  $^{13}\text{C}$  NMR (100 MHz,  $\text{CDCl}_3$ )  $\delta$  153.4, 137.7, 133.2, 131.2, 128.5, 128.0, 125.8, 125.7, 125.4, 125.0, 124.8, 83.4, 83.2, 25.0, 24.5 (The carbon signal attached to B was not observed due to low intensity);  $^{11}\text{B}$  NMR ( $\text{CDCl}_3$ , 225 MHz, rt)  $\delta$  32.09; HRMS (ESI): calcd for  $\text{C}_{24}\text{H}_{32}\text{B}_2\text{O}_4$   $[\text{M}+\text{Na}]$ : 429.2378, found: 429.2378.

**2,2'-(2-(Thiophen-2-yl)ethene-1,1-diyl)bis(4,4,5,5-tetramethyl-1,3,2-dioxaborolane) (2k)**

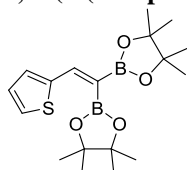

Pale yellow oil (76.8 mg, 53%).  $^1\text{H}$  NMR (400 MHz,  $\text{CDCl}_3$ )  $\delta$  7.71 (s, 1H), 7.27-7.26 (m, 1H), 7.19-7.18 (m, 1H), 6.96 (dd,  $J$  = 5.2, 3.6 Hz, 1H), 1.37 (s, 12H), 1.26 (s, 12H);  $^{13}\text{C}$  NMR (100 MHz,  $\text{CDCl}_3$ )  $\delta$  145.8, 144.2, 129.2, 127.1, 127.0, 83.6, 83.1, 24.8, 24.5. The carbon signal attached to B was not observed due to low intensity;  $^{11}\text{B}$  NMR ( $\text{CDCl}_3$ , 225 MHz, rt)  $\delta$  31.22; HRMS (ESI): calcd for  $\text{C}_{18}\text{H}_{28}\text{B}_2\text{O}_4\text{S}$  [ $\text{M}+\text{Na}$ ]: 385.1786, found: 385.1786.

**2,2'-(2-Cyclohexenylethene-1,1-diyl)bis(4,4,5,5-tetramethyl-1,3,2-dioxaborolane) (2l)**

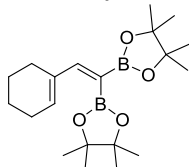

Colorless oil (89.3 mg, 62%).  $^1\text{H}$  NMR (400 MHz,  $\text{CDCl}_3$ )  $\delta$  7.17 (s, 1H), 6.00-5.98 (m, 1H), 2.20-2.12 (m, 4H), 1.66-1.53 (m, 4H), 1.30 (s, 12H), 1.22 (s, 12H);  $^{13}\text{C}$  NMR (100 MHz,  $\text{CDCl}_3$ )  $\delta$  157.8, 138.6, 134.9, 83.3, 82.7, 26.2, 25.8, 24.8, 24.7, 22.3, 22.0 (The carbon signal attached to B was not observed due to low intensity);  $^{11}\text{B}$  NMR ( $\text{CDCl}_3$ , 225 MHz, rt)  $\delta$  32.49; HRMS (ESI): calcd for  $\text{C}_{20}\text{H}_{34}\text{B}_2\text{O}_4$  [ $\text{M}+\text{Na}$ ]: 383.2535, found: 383.2535.

**2,2'-(Hept-1-ene-1,1-diyl)bis(4,4,5,5-tetramethyl-1,3,2-dioxaborolane) (2m)**

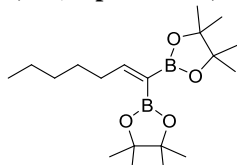

Yellow oil. (99.5 mg, 71%).  $^1\text{H}$  NMR (400 MHz,  $\text{CDCl}_3$ )  $\delta$  6.92 (t,  $J$  = 7.2 Hz, 1H), 2.24 (dt,  $J$  = 7.2, 7.2 Hz, 2H), 1.44-1.36 (m, 2H), 1.28-1.22 (m, 28H), 0.86 (t,  $J$  = 7.2 Hz, 3H);  $^{13}\text{C}$  NMR (100 MHz,  $\text{CDCl}_3$ )  $\delta$  162.4, 83.0, 82.7, 35.4, 31.5, 28.7, 24.8, 24.7, 22.5, 14.0 (The carbon signal attached to B was not observed due to low intensity);  $^{11}\text{B}$  NMR 34.08, 31.47; ( $\text{CDCl}_3$ , 225 MHz, rt)  $\delta$  HRMS (ESI): calcd for  $\text{C}_{19}\text{H}_{36}\text{B}_2\text{O}_4$  [ $\text{M}+\text{Na}$ ]: 373.2691, found: 373.2691.

**2,2'-(2-Cyclohexylethene-1,1-diyl)bis(4,4,5,5-tetramethyl-1,3,2-dioxaborolane) (2n)**

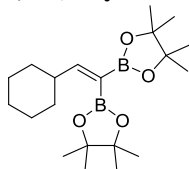

Colorless oil (128.9 mg, 89%).  $^1\text{H}$  NMR (400 MHz,  $\text{CDCl}_3$ )  $\delta$  6.74 (d,  $J$  = 8.8 Hz, 1H), 2.30-2.21 (m, 1H), 1.73-1.70 (m, 4H), 1.29 (s, 12H), 1.22-1.08 (m, 16H).  $^{13}\text{C}$  NMR (100 MHz,  $\text{CDCl}_3$ )  $\delta$  166.8, 83.0, 82.7, 44.1, 32.6, 25.9, 25.8, 24.8, 24.6 (The carbon signal attached to B was not observed due to low intensity);  $^{11}\text{B}$  NMR ( $\text{CDCl}_3$ , 225 MHz, rt)  $\delta$  31.56; HRMS (ESI): calcd for  $\text{C}_{20}\text{H}_{36}\text{B}_2\text{O}_4$  [ $\text{M}+\text{Na}$ ]: 385.2691, found: 385.2691.

**2,2'-(3-(Tetrahydro-2H-pyran-2-yloxy)prop-1-ene-1,1-diyl)bis(4,4,5,5-tetramethyl-1,3,2-dioxaborolane) (2o)**

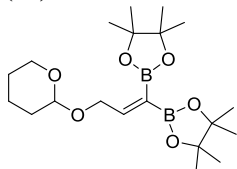

Colorless oil (118.3 mg, 75%).  $^1\text{H}$  NMR (400 MHz,  $\text{CDCl}_3$ )  $\delta$  7.00 (dd,  $J$  = 6.0, 5.2 Hz, 1H), 4.63 (t,  $J$  = 3.6 Hz, 1H), 4.38 (dd,  $J$  = 14.0, 5.2 Hz, 1H), 4.21, (dd,  $J$  = 14.0, 6.0 Hz, 1H), 3.87-3.82 (m 1H), 3.51-3.45 (m, 1H), 1.88-1.77 (m, 1H), 1.74-1.65 (m, 1H), 1.63-1.48 (m, 4H), 1.28 (s, 12H), 1.24 (s, 12H);  $^{13}\text{C}$  NMR (100 MHz,  $\text{CDCl}_3$ )  $\delta$  157.5, 97.7, 83.2, 83.0, 68.2, 61.9, 30.5, 25.5, 24.8, 24.7, 19.3;  $^{11}\text{B}$  NMR ( $\text{CDCl}_3$ , 225 MHz, rt)  $\delta$  30.87; HRMS (ESI): calcd for  $\text{C}_{20}\text{H}_{36}\text{B}_2\text{O}_6$  [ $\text{M}+\text{Na}$ ]: 417.2590, found: 417.2589.

**1,1,7,7-Tetrakis(4,4,5,5-tetramethyl-1,3,2-dioxaborolan-2-yl)hepta-1,6-diene (2p)**

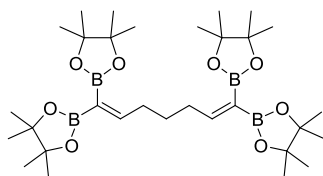

Colorless oil (156.1 mg, 65%).  $^1\text{H}$  NMR (400 MHz,  $\text{CDCl}_3$ )  $\delta$  6.90 (t,  $J = 7.2$  Hz, 2H), 2.28-2.23 (m, 4H), 1.56-1.49 (m, 2H), 1.25 (s, 24H), 1.20 (s, 24H);  $^{13}\text{C}$  NMR (100 MHz,  $\text{CDCl}_3$ )  $\delta$  161.9, 82.9, 82.6, 35.0, 31.5, 28.5, 24.8, 24.7;  $^{11}\text{B}$  NMR ( $\text{CDCl}_3$ , 225 MHz, rt)  $\delta$  31.16; HRMS (ESI): calcd for  $\text{C}_{31}\text{H}_{56}\text{B}_4\text{O}_8$   $[\text{M}+\text{Na}]$ : 623.4239, found: 623.4239.

**(E)-2-(4-Methoxystyryl)-4,4,5,5-tetramethyl-1,3,2-dioxaborolane (3a)<sup>7</sup>**

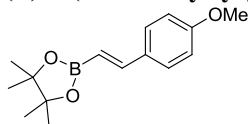

White solid (93.6 mg, 85%).  $^1\text{H}$  NMR (400 MHz,  $\text{CDCl}_3$ )  $\delta$  7.43 (d,  $J = 8.8$  Hz, 1H), 7.35 (d,  $J = 18.4$  Hz, 1H), 6.85 (d,  $J = 8.4$  Hz, 1H), 6.01 (d,  $J = 18.4$  Hz, 1H), 3.79 (s, 3H), 1.30 (s, 12H);  $^{13}\text{C}$  NMR (100 MHz,  $\text{CDCl}_3$ )  $\delta$  160.1, 148.9, 130.2, 128.3, 113.8, 83.1, 55.2, 24.8. The carbon signal attached to B was not observed due to low intensity.

**(E)-2-(4-Fluorostyryl)-4,4,5,5-tetramethyl-1,3,2-dioxaborolane (3b)<sup>8</sup>**

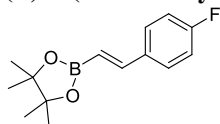

Colorless oil (69.5 mg, 70%).  $^1\text{H}$  NMR (400 MHz,  $\text{CDCl}_3$ )  $\delta$  7.47-7.42 (m, 2H), 7.35 (d,  $J = 18.4$  Hz, 1H), 7.04-6.98 (m, 2H), 6.07 (d,  $J = 18.4$  Hz, 1H), 1.30 (s, 12H);  $^{13}\text{C}$  NMR (100 MHz,  $\text{CDCl}_3$ )  $\delta$  162.9 (d,  $J = 247.0$  Hz), 148.2, 133.5 (d,  $J = 2.5$  Hz), 128.5 (d,  $J = 8.2$  Hz), 115.4 (d,  $J = 21.4$  Hz), 83.1, 24.8. The carbon signal attached to B was not observed due to low intensity.

**(E)-Methyl 4-(2-(4,4,5,5-tetramethyl-1,3,2-dioxaborolan-2-yl)vinyl)benzoate (3c)<sup>9</sup>**

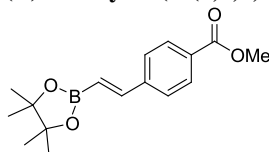

White solid (86.4 mg, 75%).  $^1\text{H}$  NMR (400 MHz,  $\text{CDCl}_3$ )  $\delta$  8.01-7.98 (m, 2H), 7.52 (d,  $J = 8.4$  Hz, 2H), 7.40 (d,  $J = 18.4$  Hz, 1H), 6.27 (s,  $J = 18.4$  Hz, 1H), 3.90 (s, 3H), 1.31 (s, 12H);  $^{13}\text{C}$  NMR (100 MHz,  $\text{CDCl}_3$ )  $\delta$  166.2, 147.9, 141.5, 130.0, 129.8, 126.8, 83.5, 52.1, 24.8. The carbon signal attached to B was not observed due to low intensity; HRMS (APCI): calcd for  $\text{C}_{16}\text{H}_{21}\text{BO}_4$   $[\text{M}+\text{H}]$ : 289.1605, found: 289.1605.

**(E)-2-(2-(Biphenyl-4-yl)vinyl)-4,4,5,5-tetramethyl-1,3,2-dioxaborolane (3d)**

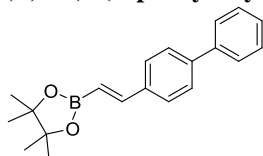

Yellow solid (96.8 mg, 79%).  $^1\text{H}$  NMR (400 MHz,  $\text{CDCl}_3$ )  $\delta$  7.61-7.56 (m, 6H), 7.46-7.41 (m, 3H), 7.36-7.34 (m, 1H), 6.21 (d,  $J = 18.4$  Hz, 1H), 1.33 (s, 12H);  $^{13}\text{C}$  NMR (100 MHz,  $\text{CDCl}_3$ )  $\delta$  148.8, 141.5, 140.4, 136.4, 128.7, 127.4, 127.3, 127.1, 126.9, 83.6, 24.8. The carbon signal attached to B was not observed due to low intensity; HRMS (APCI): calcd for  $\text{C}_{20}\text{H}_{23}\text{BO}_2$   $[\text{M}+\text{H}]$ : 307.1863, found: 307.1863.

**(E)-2-(2-Cyclohexenylvinyl)-4,4,5,5-tetramethyl-1,3,2-dioxaborolane (3e)<sup>10</sup>**

<sup>7</sup> Stewart, S. K.; Whiting, A. *J. Organomet. Chem.* **1994**, 482, 293.

<sup>8</sup> Wen, K.; Chen, J.; Gao, F.; Bhadury, P. S.; Fan, E.; Sun, Z. *Org. Biomol. Chem.* **2013**, 11, 6350.

<sup>9</sup> Haberberger, M. and Enthaler, S. *Chem. Asian J.* **2013**, 8, 50

<sup>10</sup> Shade, R. E.; Hyde, A. M.; Olsen, J.-C.; Merlic, C. *J. Am. Chem. Soc.* **2010**, 132, 1202.

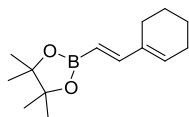

Colorless oil (46.8 mg, 50%).  $^1\text{H}$  NMR (400 MHz,  $\text{CDCl}_3$ )  $\delta$  7.01 (d,  $J$  = 18.4 Hz, 1H), 5.97-5.95 (m, 1H), 5.42 (d,  $J$  = 18.4 Hz, 1H), 2.14 (br, 4H), 1.69-1.55 (m, 4H), 1.27 (s, 12H);  $^{13}\text{C}$  NMR (100 MHz,  $\text{CDCl}_3$ )  $\delta$  153.1, 137.0, 134.1, 82.9, 26.2, 24.8, 23.7, 22.4, 22.3. The carbon signal attached to B was not observed due to low intensity.

**(E)-2-(Dodec-1-en-1-yl)-4,4,5,5-tetramethyl-1,3,2-dioxaborolane (3f)<sup>11</sup>**

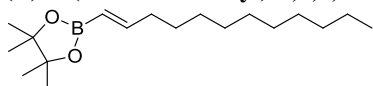

Colorless oil (100 mg, 85%).  $^1\text{H}$  NMR (400 MHz,  $\text{CDCl}_3$ )  $\delta$  6.65 (dt,  $J$  = 18.0, 6.4 Hz, 1H), 5.41 (d,  $J$  = 18.0, 1.6 Hz, 1H), 2.16-2.11 (m, 2H), 1.42-1.26 (m, 28H), 0.87 (t,  $J$  = 6.8 Hz, 3H);  $^{13}\text{C}$  NMR (100 MHz,  $\text{CDCl}_3$ )  $\delta$  154.7, 82.9, 35.8, 31.9, 29.6(6), 29.6(2), 29.5, 29.3, 29.2(7), 29.2(6), 24.8, 22.7, 14.1. The carbon signal attached to B was not observed due to low intensity.

**(E)-2-(2-Cyclohexylvinyl)-4,4,5,5-tetramethyl-1,3,2-dioxaborolane (3g)<sup>12</sup>**

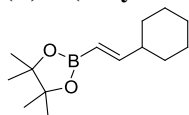

Colorless oil (51.0 mg, 54%).  $^1\text{H}$  NMR (400 MHz,  $\text{CDCl}_3$ )  $\delta$  6.55 (dd,  $J$  = 18.4, 6.0 Hz, 1H), 5.37 (d,  $J$  = 18.4 Hz, 1H), 2.06-1.99 (m, 1H), 1.75-1.62 (m, 6H), 1.27 (s, 12H), 1.19-1.05 (m, 4H);  $^{13}\text{C}$  NMR (100 MHz,  $\text{CDCl}_3$ )  $\delta$  159.7, 82.9, 43.2, 31.9, 26.1, 25.9, 24.8. The carbon signal attached to B was not observed due to low intensity. HRMS (ESI): calcd for  $[\text{M}+\text{H}]$ : 237.1913, found: 237.1913.

**1,4-Bis((E)-2-(4,4,5,5-tetramethyl-1,3,2-dioxaborolan-2-yl)vinyl)benzene (3h)<sup>13</sup>**

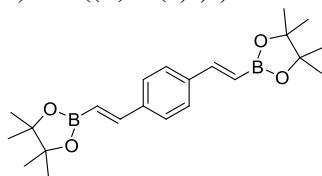

White solid (122.3 mg, 80%).  $^1\text{H}$  NMR (400 MHz,  $\text{CDCl}_3$ )  $\delta$  7.45 (s, 4H), 7.36 (d,  $J$  = 18.4 Hz, 2H), 6.16 (d,  $J$  = 18.4 Hz, 2H), 1.31 (s, 24H);  $^{13}\text{C}$  NMR (100 MHz,  $\text{CDCl}_3$ )  $\delta$  148.7, 137.8, 127.2, 119.6, 83.8, 24.8. The carbon signal attached to B was not observed due to low intensity.

**(Z)-2-(1,2-Diphenylvinyl)-4,4,5,5-tetramethyl-1,3,2-dioxaborolane (3i)<sup>14</sup>**

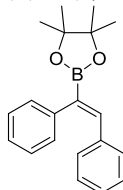

Pale yellow solid (118.8 mg, 97%).  $^1\text{H}$  NMR (400 MHz,  $\text{CDCl}_3$ )  $\delta$  7.36 (s, 1H), 7.28-7.03 (m, 10H), 1.31 (s, 12H);  $^{13}\text{C}$  NMR (100 MHz,  $\text{CDCl}_3$ )  $\delta$  143.0, 140.2, 136.8, 129.8, 128.7, 128.1, 127.7, 127.4, 126.1, 83.7, 24.8. The carbon signal attached to B was not observed due to low intensity.

**(Z)-2-(1,2-Bis(4-fluorophenyl)vinyl)-4,4,5,5-tetramethyl-1,3,2-dioxaborolane (3j)**

<sup>11</sup> Quigley, B. L.; Grubbs, R. H. *Chem. Sci.* **2014**, 5, 501.

<sup>12</sup> Haberberger, M. and Enthaler, S. *Chem. Asian J.* **2013**, 8, 50

<sup>13</sup> Lee, T.; Baik, C.; Jung, I.; Song, K. H.; Kim, S.; Kim, D.; Kang, S. O.; Ko, J. *Organometallics*. **2004**, 23, 4569.

<sup>14</sup> Grirrane, A.; Corma, A.; Garcia, H. *Chem. Eur. J.* **2011**, 17, 2467.

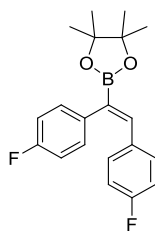

White solid (110.9 mg, 81%).  $^1\text{H}$  NMR (400 MHz,  $\text{CDCl}_3$ )  $\delta$  7.33 (s, 1H), 7.13-6.95 (m, 6H), 6.83 (t,  $J$  = 8.4 Hz, 2H), 1.32 (s, 12H);  $^{13}\text{C}$  NMR (100 MHz,  $\text{CDCl}_3$ )  $\delta$  161.8 (d,  $J$  = 246.7 Hz), 161.5 (d,  $J$  = 243.4 Hz), 142.1, 135.7 (d,  $J$  = 3.3 Hz), 132.7 (d,  $J$  = 3.3 Hz), 131.4 (d,  $J$  = 8.3 Hz), 130.2 (d,  $J$  = 8.2 Hz), 115.2 (d,  $J$  = 20.7 Hz), 114.8 (d,  $J$  = 20.7 Hz), 83.8, 24.8; HRMS (APCI): calcd for  $\text{C}_{20}\text{H}_{21}\text{BF}_2\text{O}_2$   $[\text{M}+\text{H}]$ : 343.1675, found: 343.1675.

**(Z)-2-(1,2-Di(thiophen-2-yl)vinyl)-4,4,5,5-tetramethyl-1,3,2-dioxaborolane (3k)<sup>15</sup>**

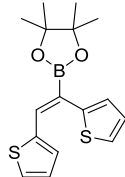

Yellow oil (99.2 mg, 78%).  $^1\text{H}$  NMR (400 MHz,  $\text{CDCl}_3$ )  $\delta$  7.63 (s, 1H), 7.38 (dd,  $J$  = 5.2, 1.2 Hz, 1H), 7.21-7.19 (m, 1H), 7.12-7.11 (m, 1H), 7.08 (dd,  $J$  = 5.2, 3.2 Hz, 1H), 6.93-6.90 (m, 2H), 1.31 (s, 12H);  $^{13}\text{C}$  NMR (100 MHz,  $\text{CDCl}_3$ )  $\delta$  140.7, 139.8, 139.1, 131.4, 128.7, 127.3, 126.0, 125.7, 83.8, 24.7; HRMS (APCI): calcd for  $\text{C}_{14}\text{H}_{16}\text{BO}_2\text{S}_2$   $[\text{M}+\text{H}]$ : 319.0992, found: 319.0991.

**(Z)-2-(1,4-Dimethoxybut-2-en-2-yl)-4,4,5,5-tetramethyl-1,3,2-dioxaborolane (3l)**

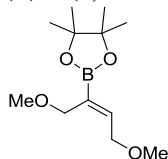

Colorless oil (58.1 mg, 60%).  $^1\text{H}$  NMR (400 MHz,  $\text{CDCl}_3$ )  $\delta$  6.58 (t,  $J$  = 5.6 Hz, 1H), 4.14 (d,  $J$  = 5.6 Hz, 2H), 4.02 (s, 2H), 3.34 (s, 3H), 3.28 (s, 3H), 1.24 (s, 12H);  $^{13}\text{C}$  NMR (100 MHz,  $\text{CDCl}_3$ )  $\delta$  146.5, 83.4, 69.6, 68.9, 58.3, 57.8, 24.7. The carbon signal attached to B was not observed due to low intensity; HRMS (ESI): calcd for  $\text{C}_{12}\text{H}_{23}\text{BO}_4$   $[\text{M}+\text{Na}]$ : 265.1581, found: 265.1580.

**Analytical data of compounds 4 and 5**

**9-Benzylidene-9H-fluorene (4)<sup>16</sup>**

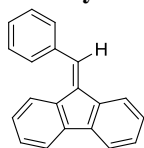

White solid (74 mg, 97%).  $^1\text{H}$  NMR (400 MHz,  $\text{CDCl}_3$ )  $\delta$  7.80 (d,  $J$  = 7.6 Hz, 1H), 7.73-7.70 (m, 3H), 7.60-7.54 (m, 3H), 7.48-7.44 (m, 2H), 7.48-7.45 (m, 2H), 7.41-7.29 (m, 4H), 7.07-7.03 (m, 1H);  $^{13}\text{C}$  NMR (100 MHz,  $\text{CDCl}_3$ )  $\delta$  141.1, 139.3, 139.0, 136.8, 136.4, 136.3, 129.1, 128.4, 128.1, 127.9, 127.1, 126.9, 126.5, 124.3, 120.1, 119.6, 119.5.

<sup>15</sup> Sundararaju, B. and Fürstner, A. *Angew. Chem. Int. Ed.* **2013**, 52, 14050

<sup>16</sup> Chernyak, N.; Gevorgyan, V. *J. Am. Chem. Soc.* **2008**, 130, 5636.

# NMR Spectra

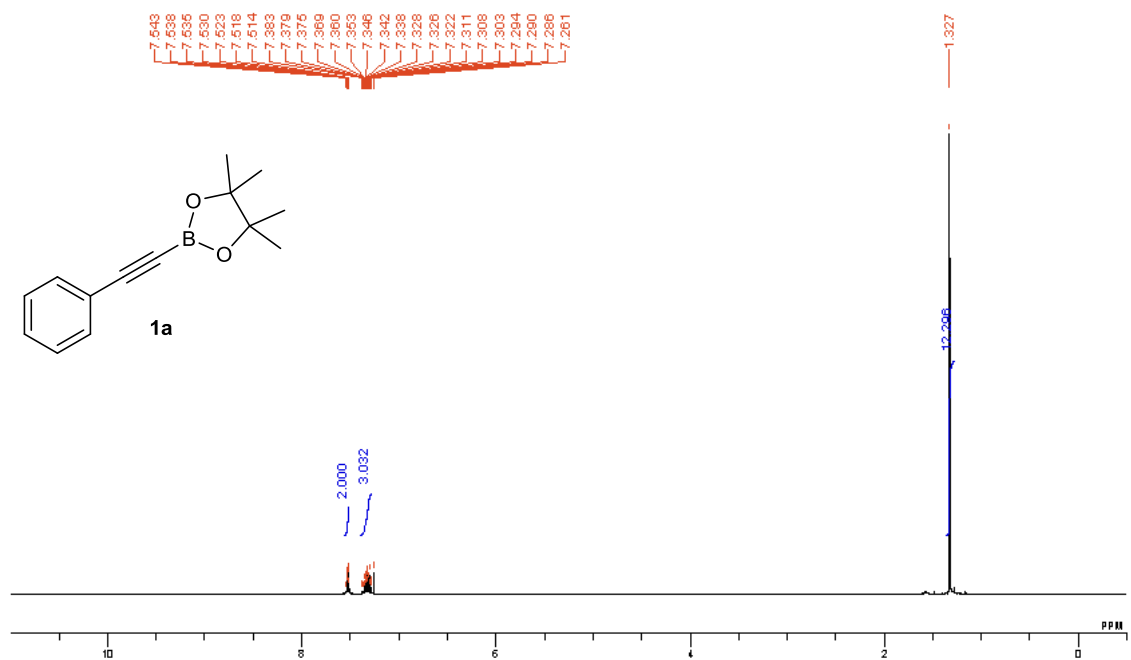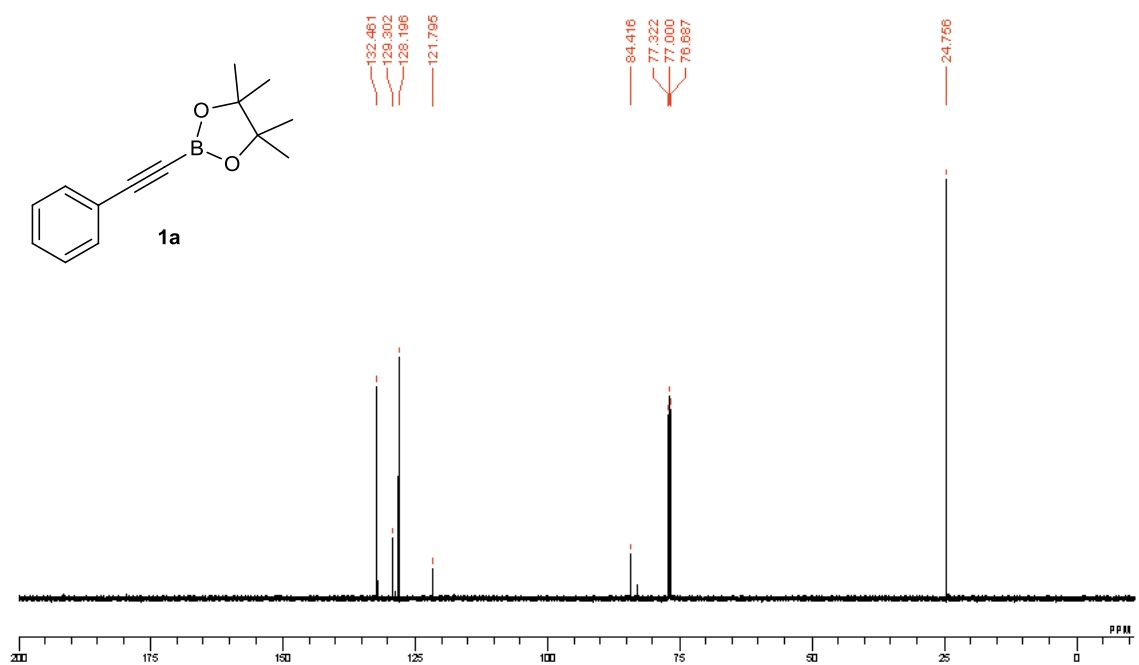

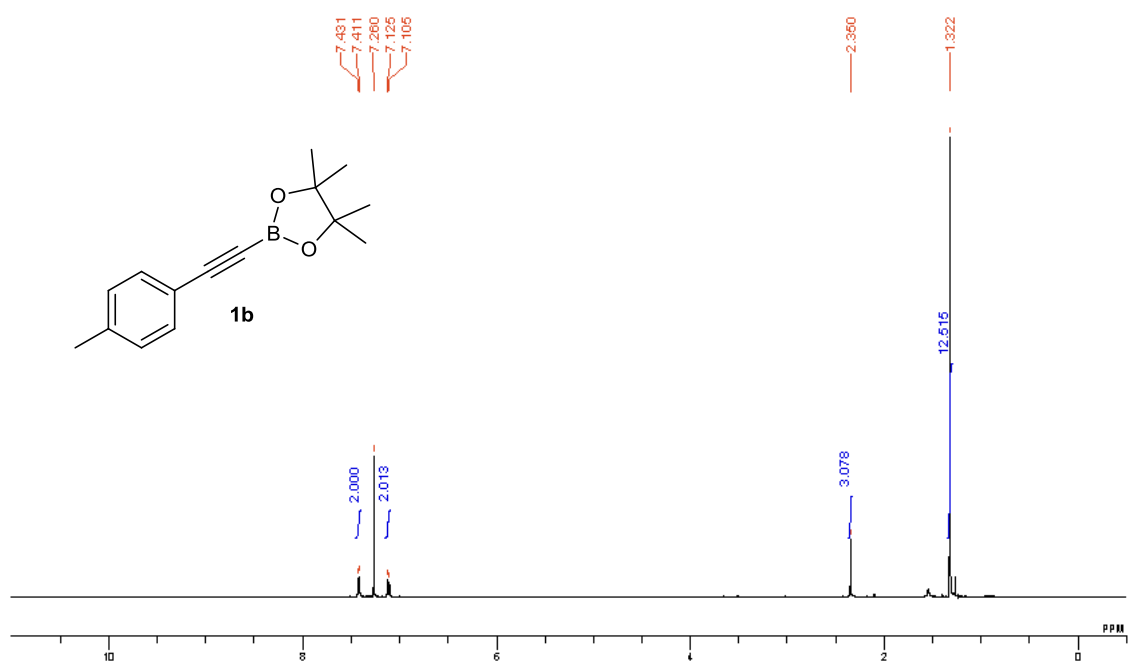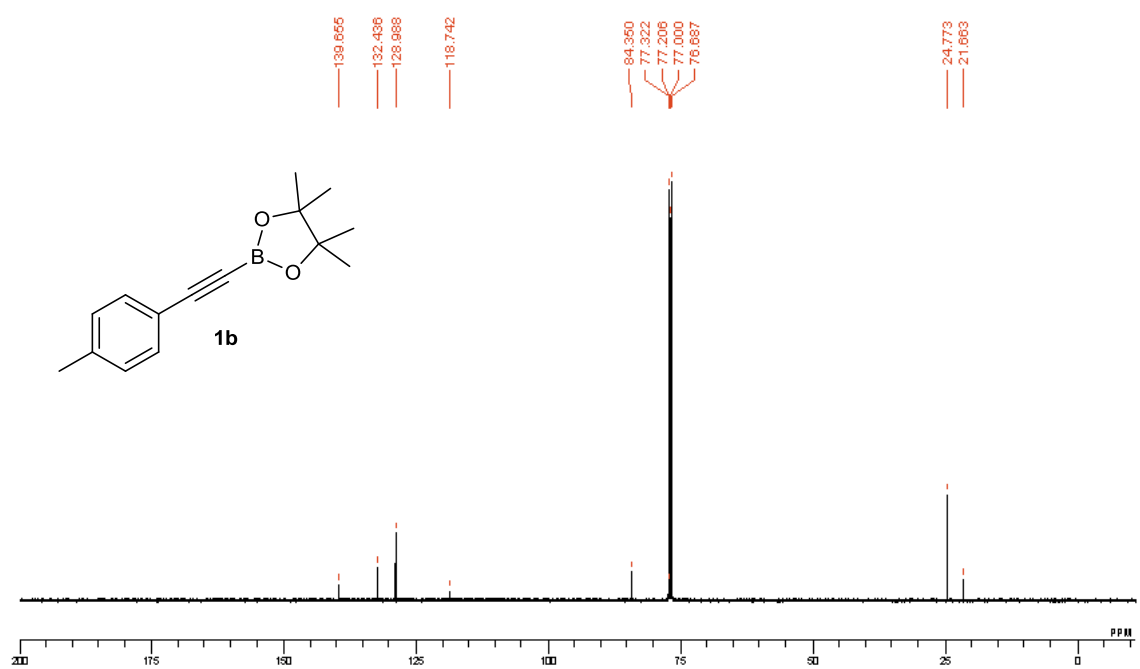

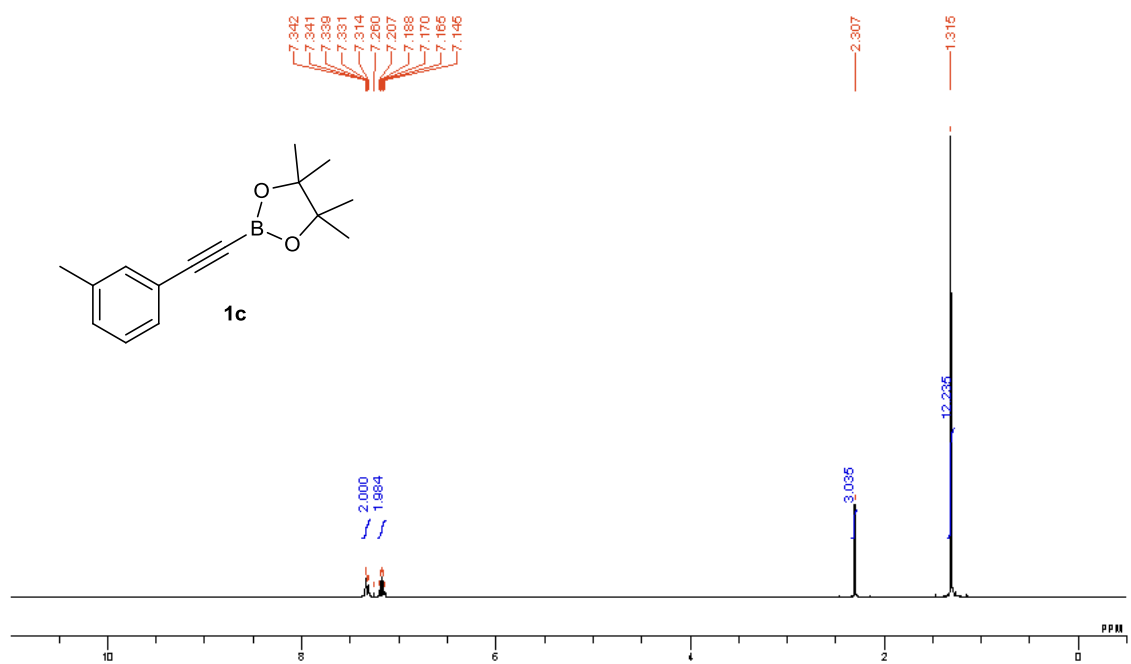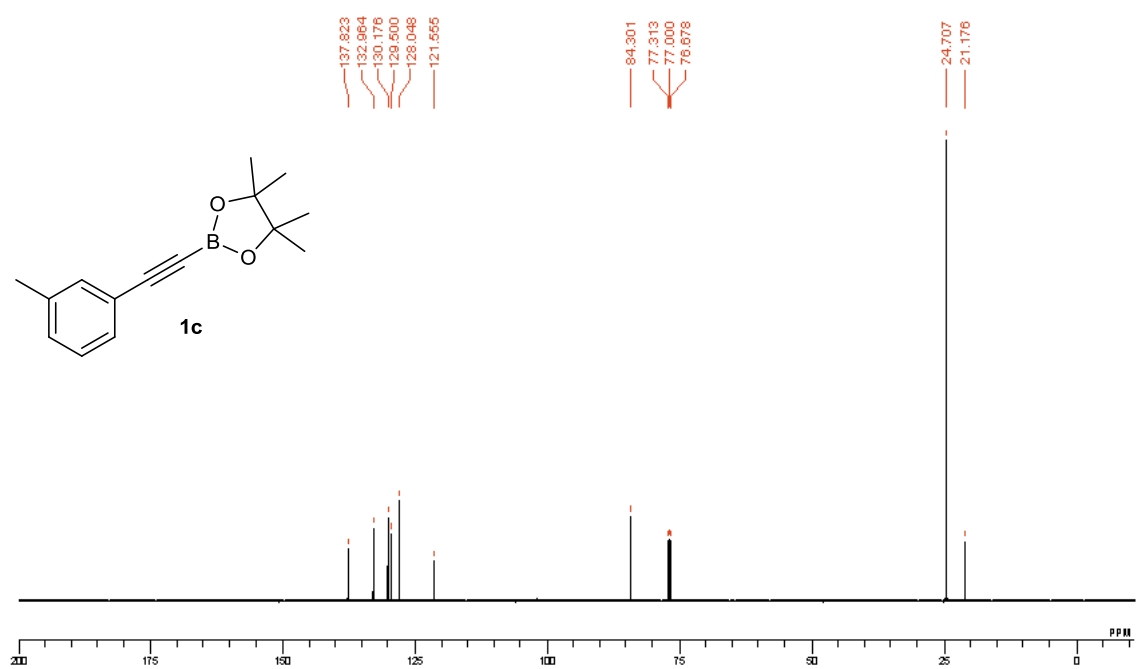



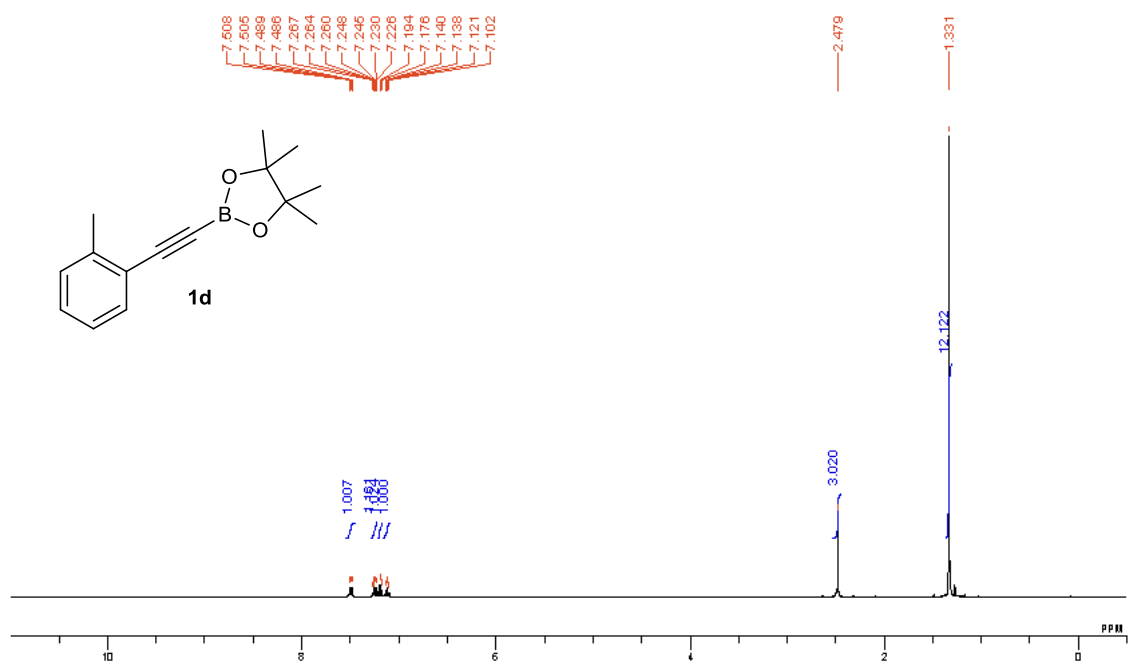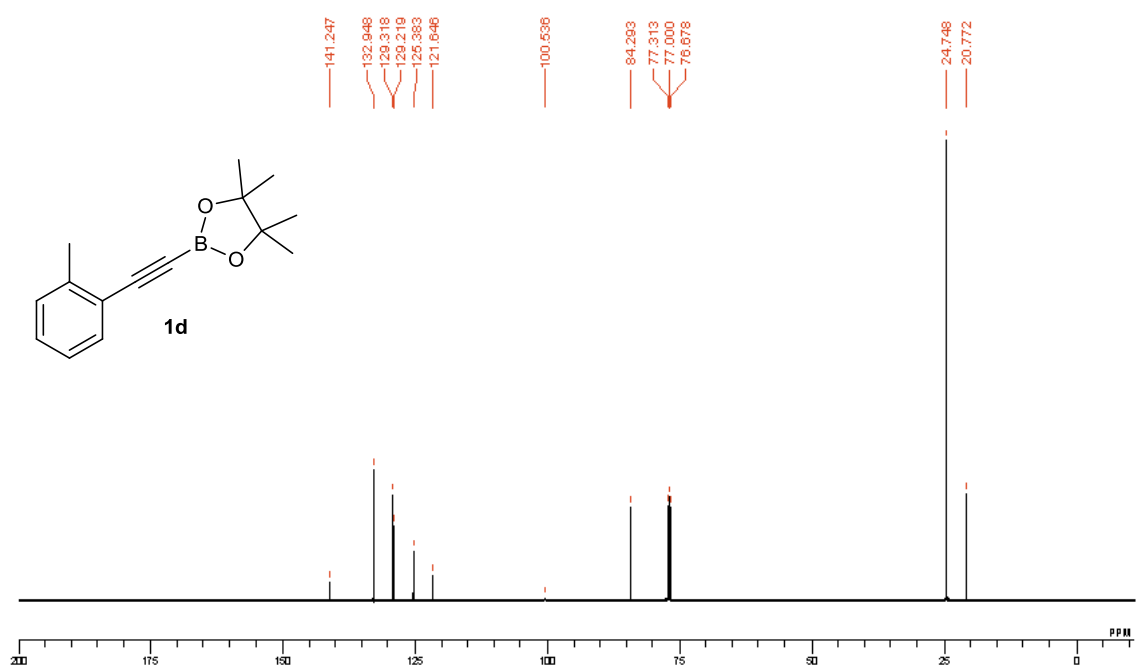

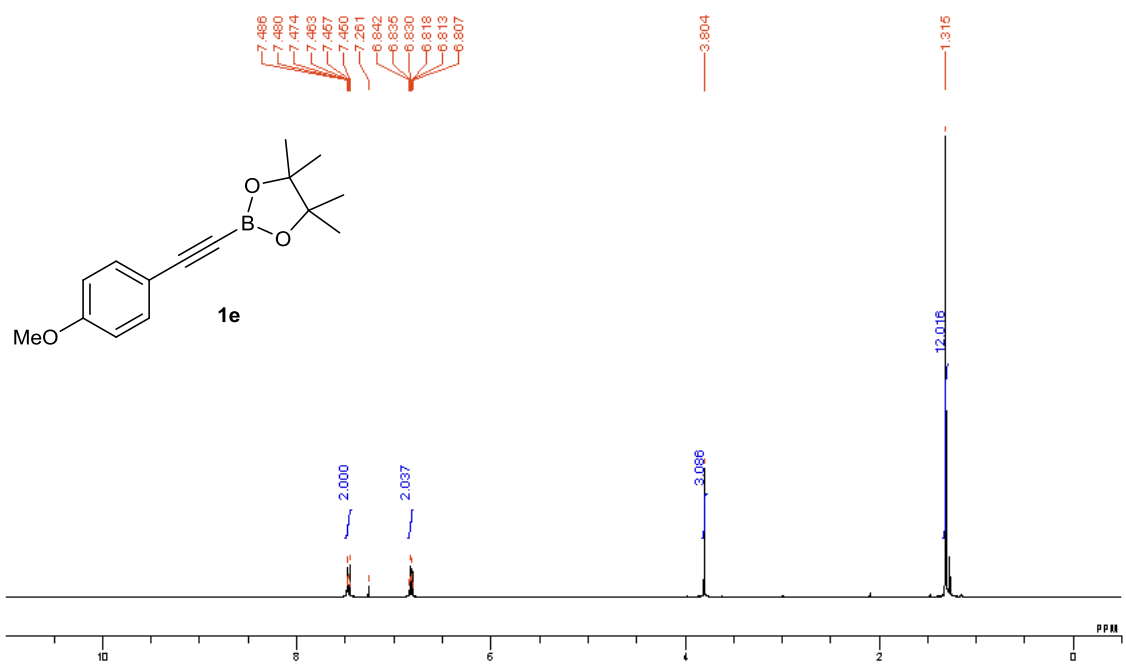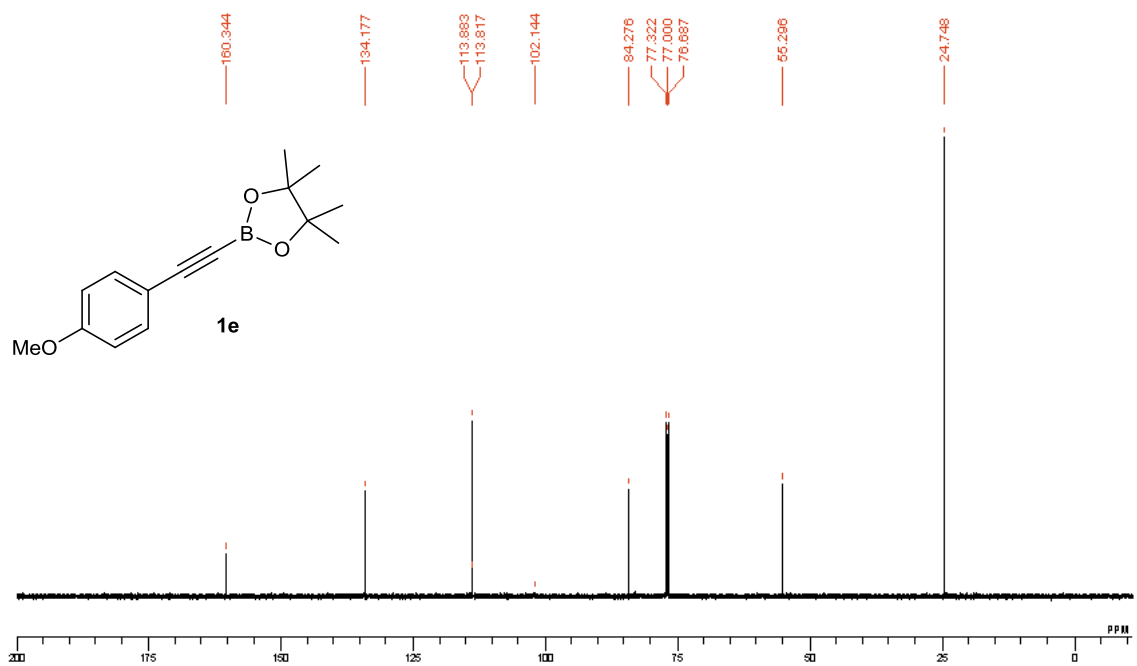

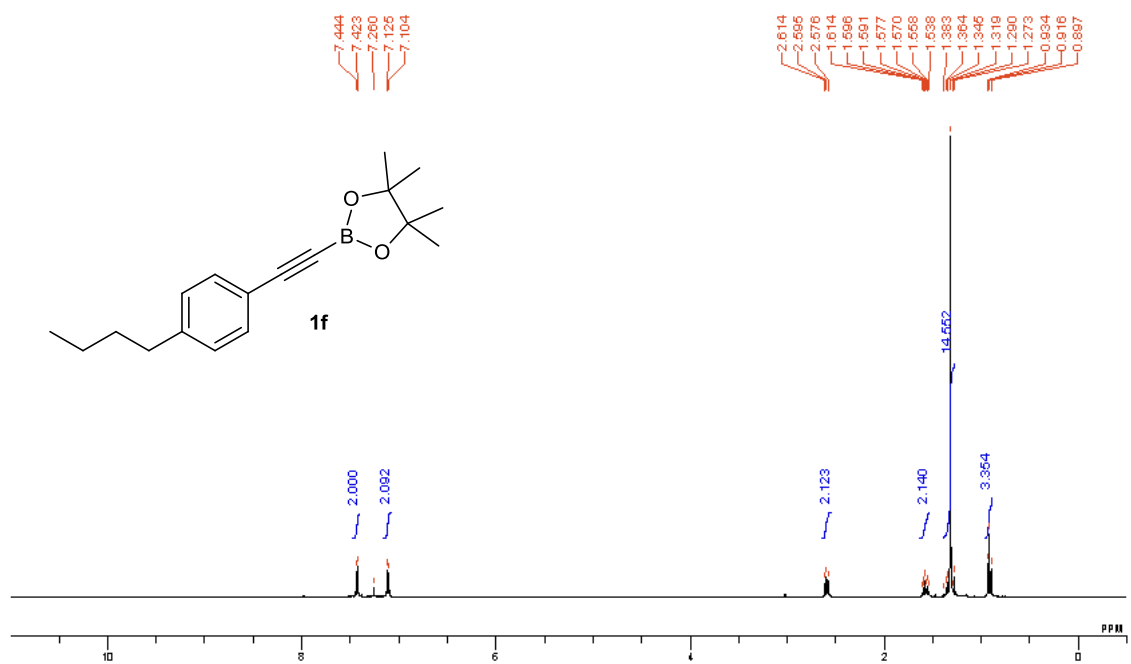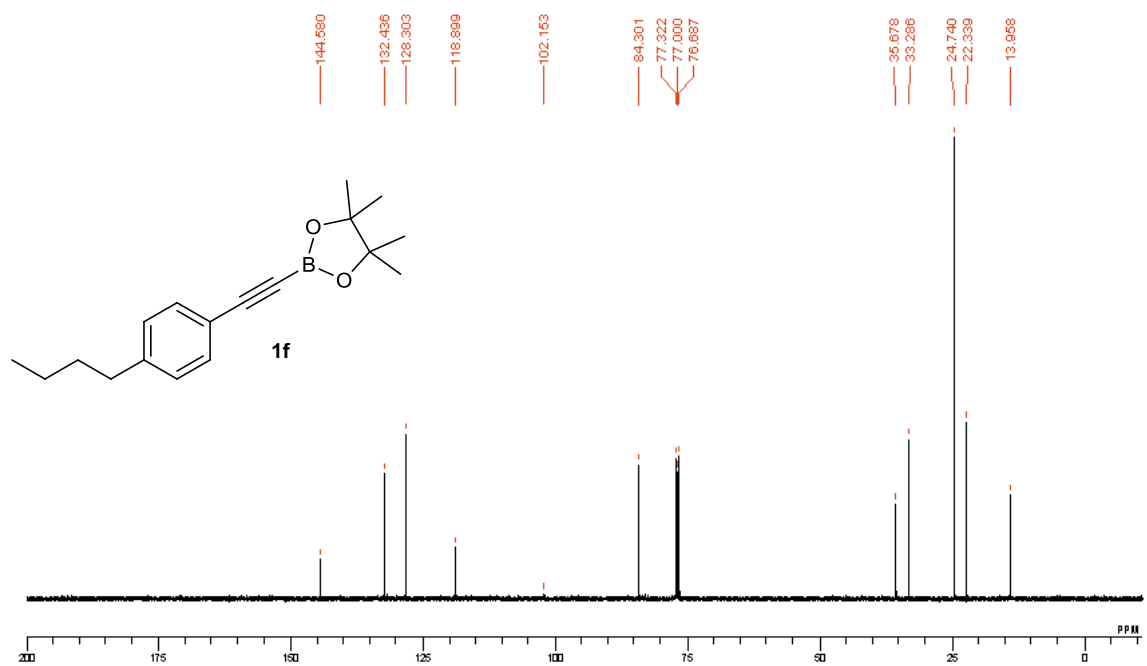

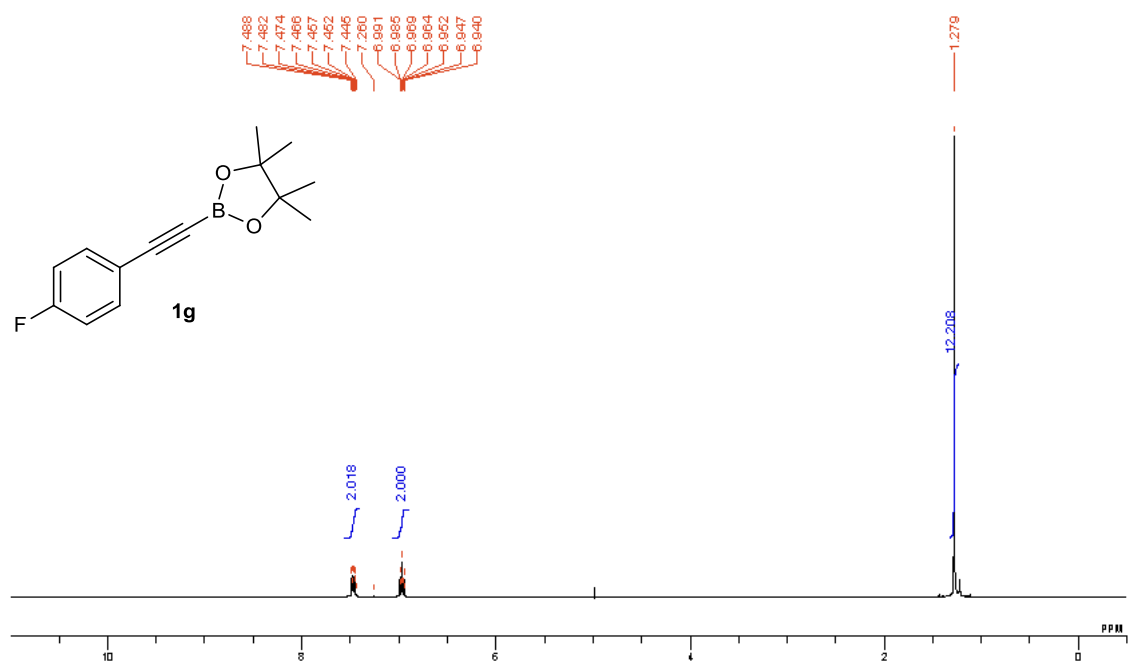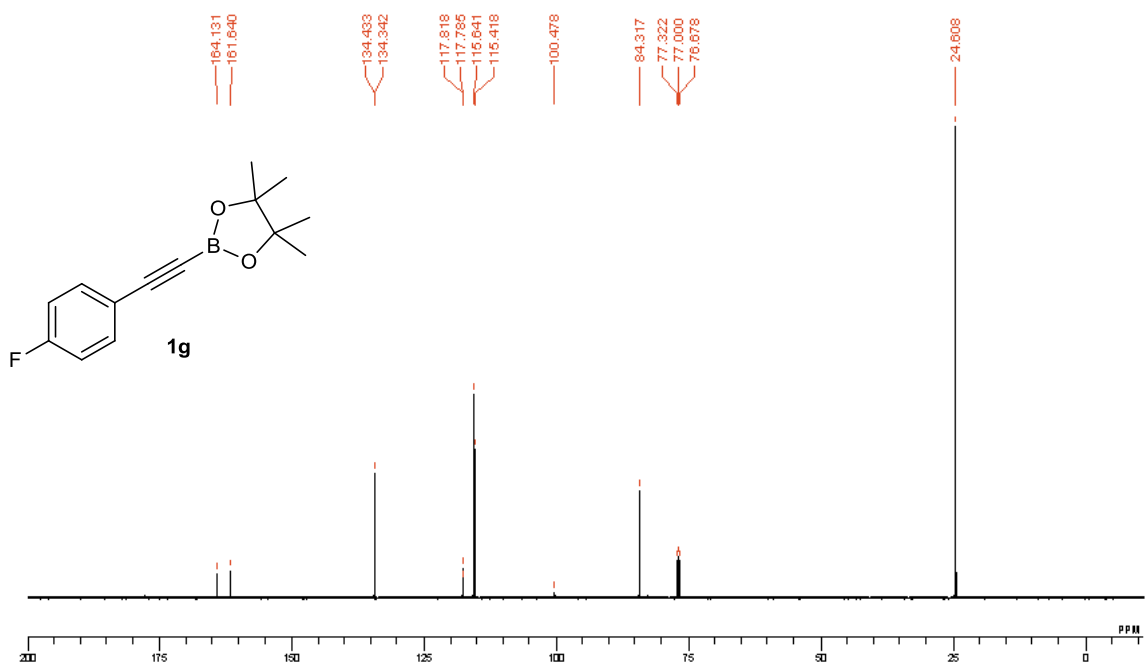

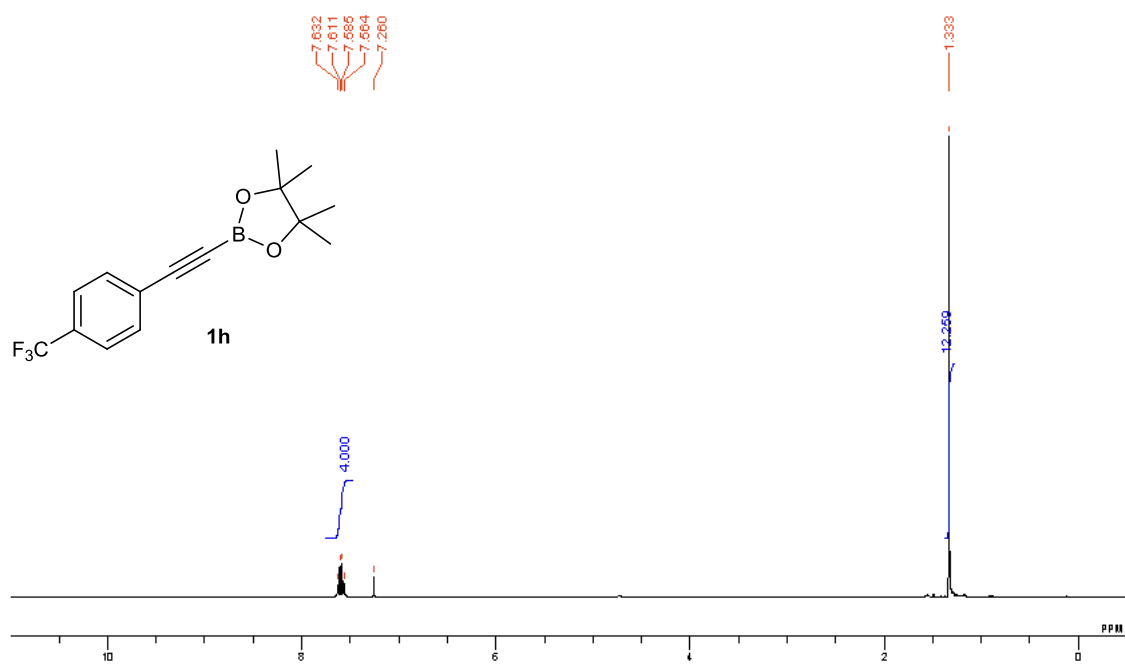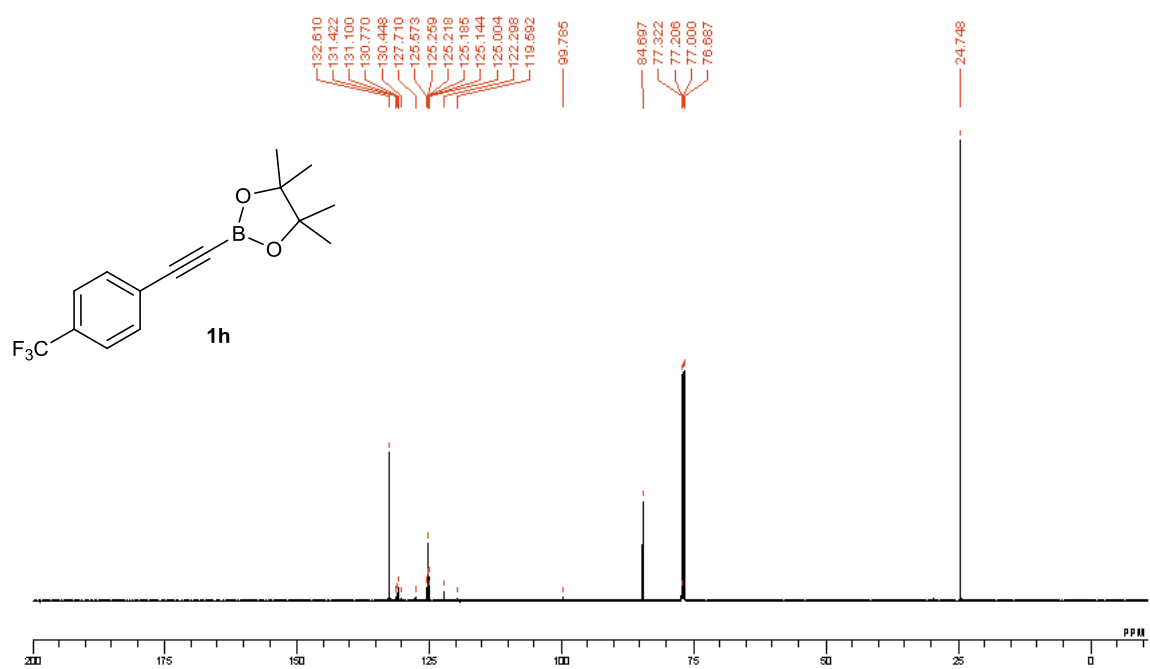

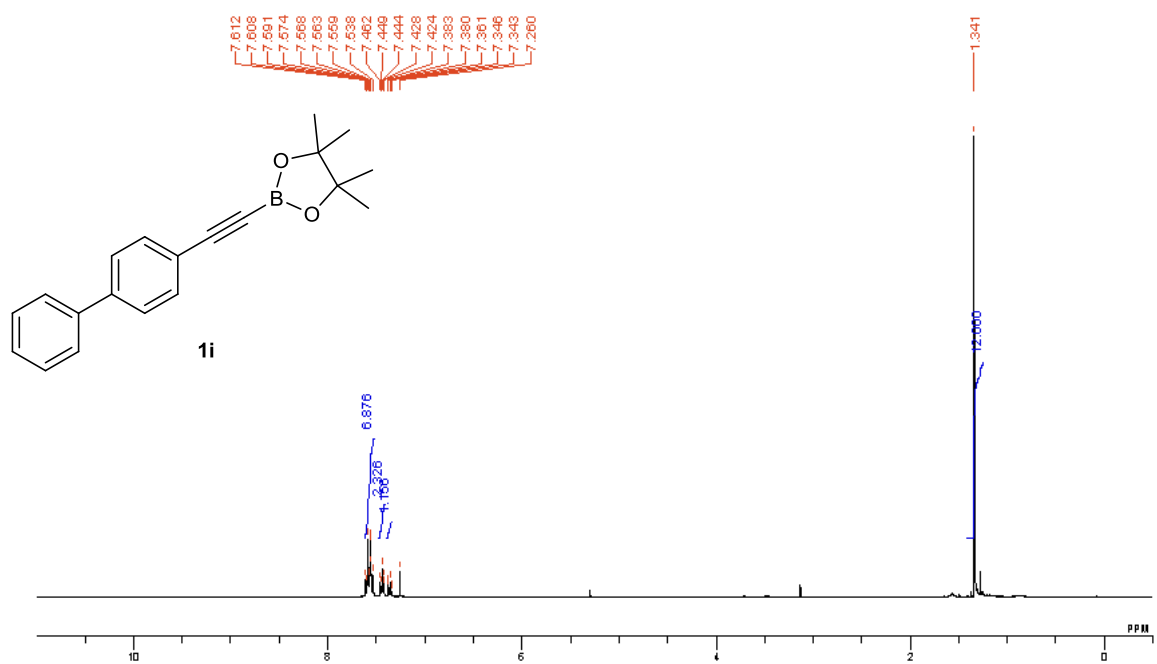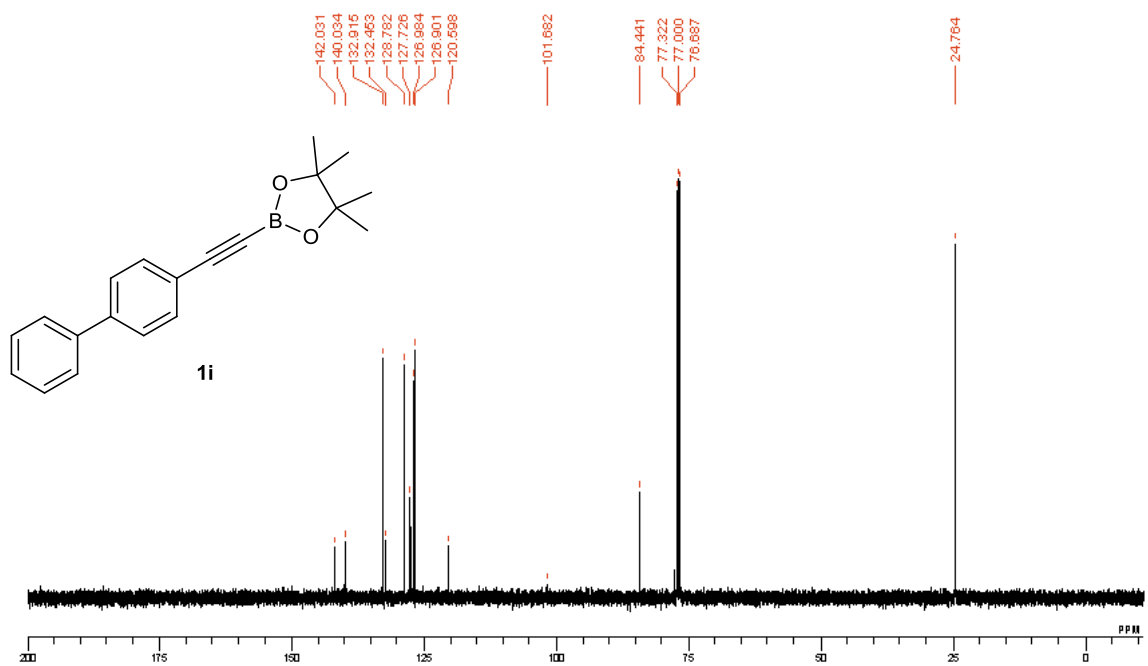

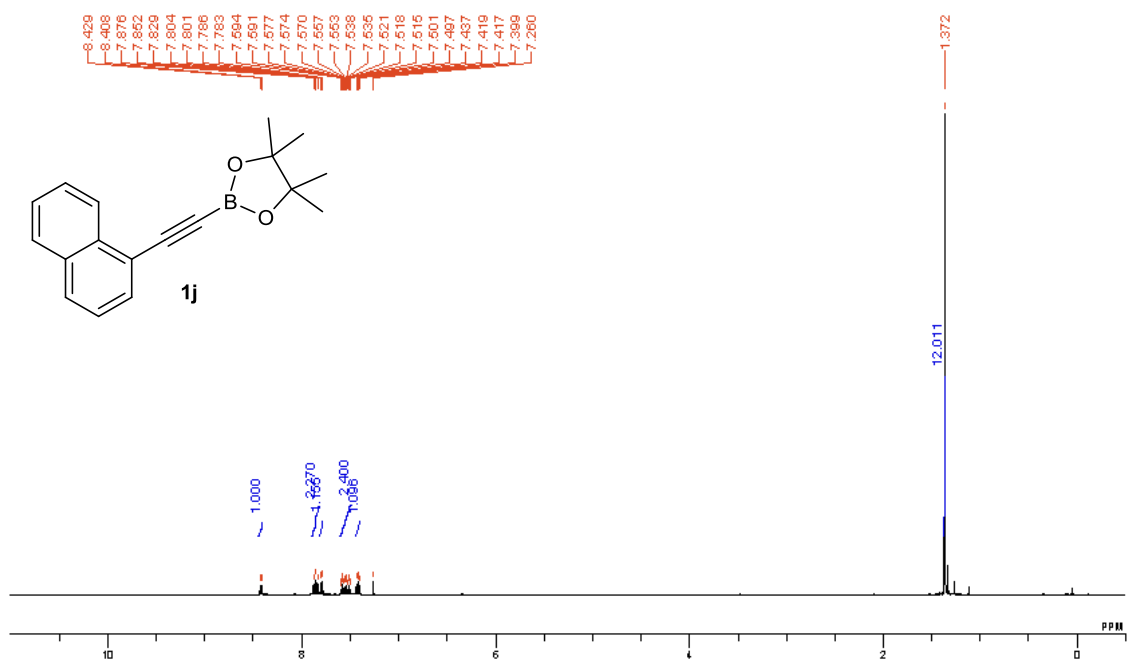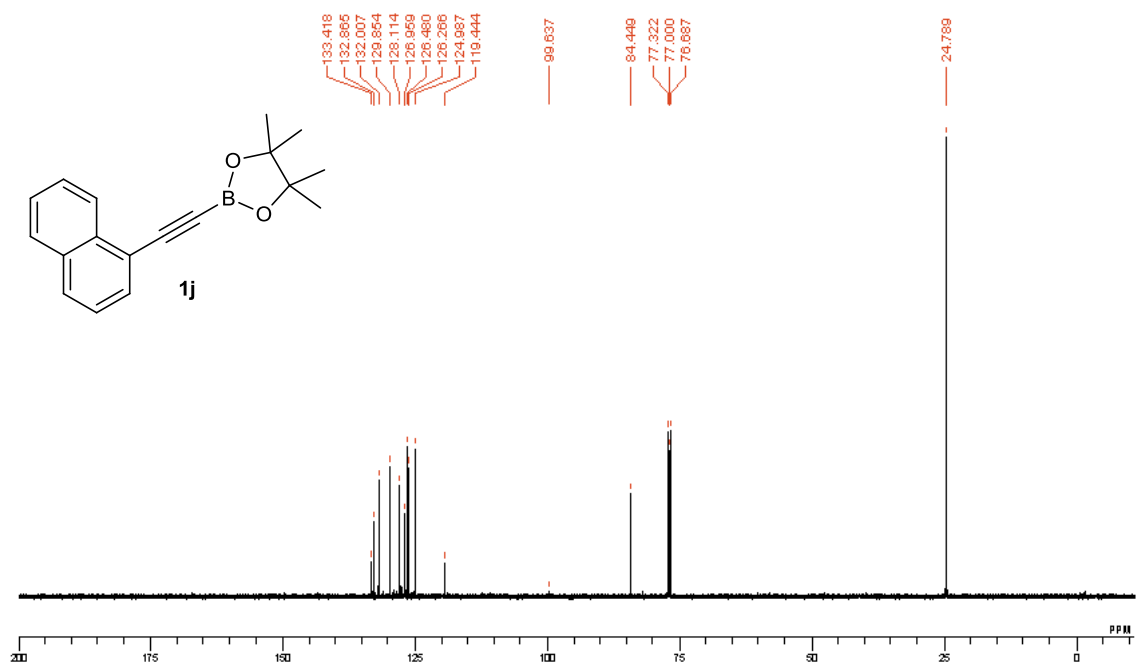

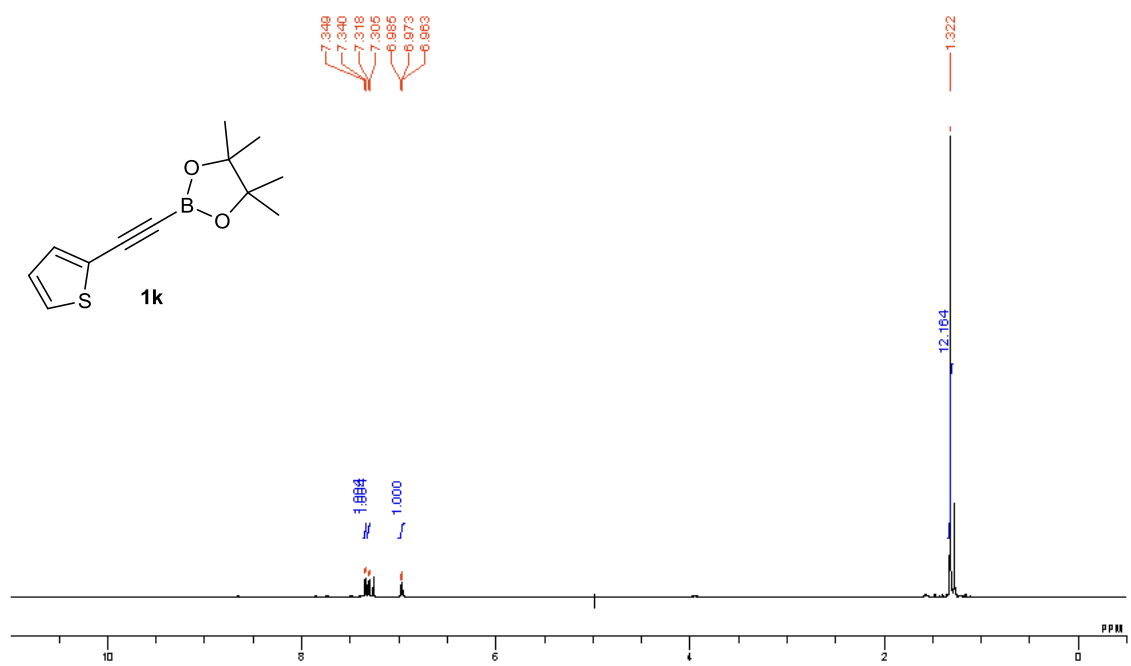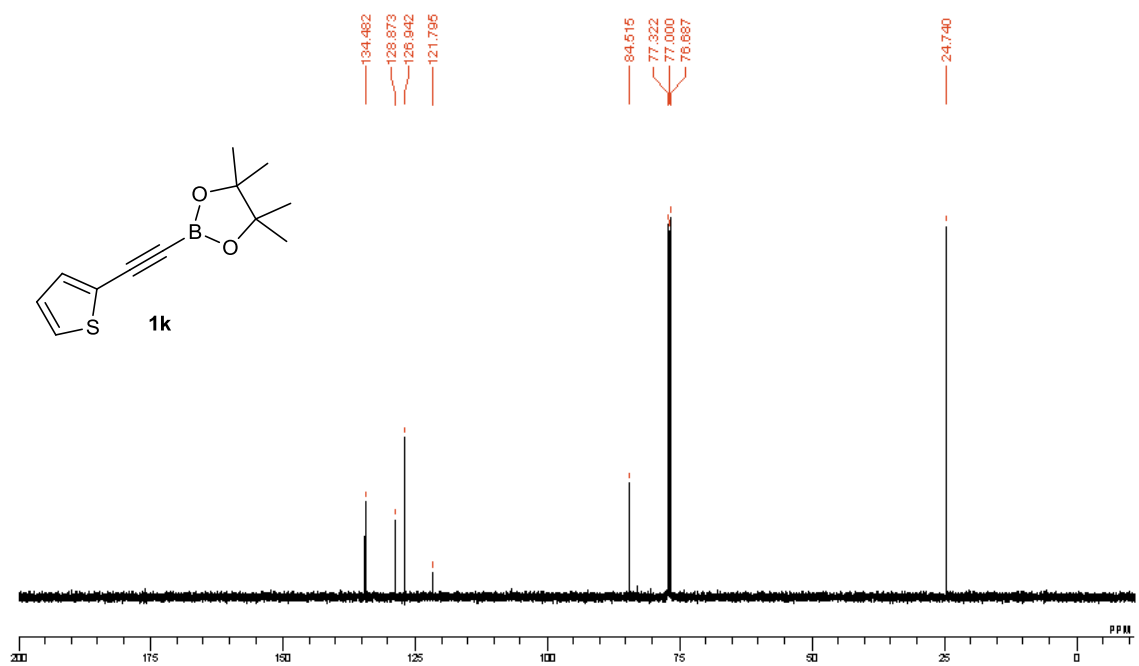



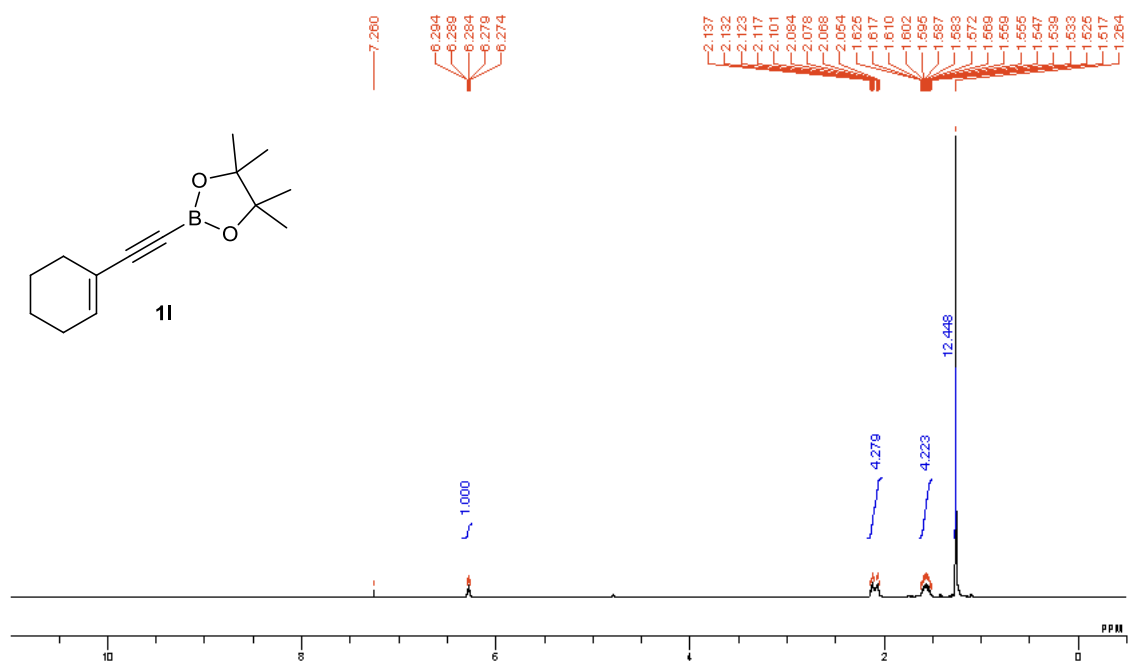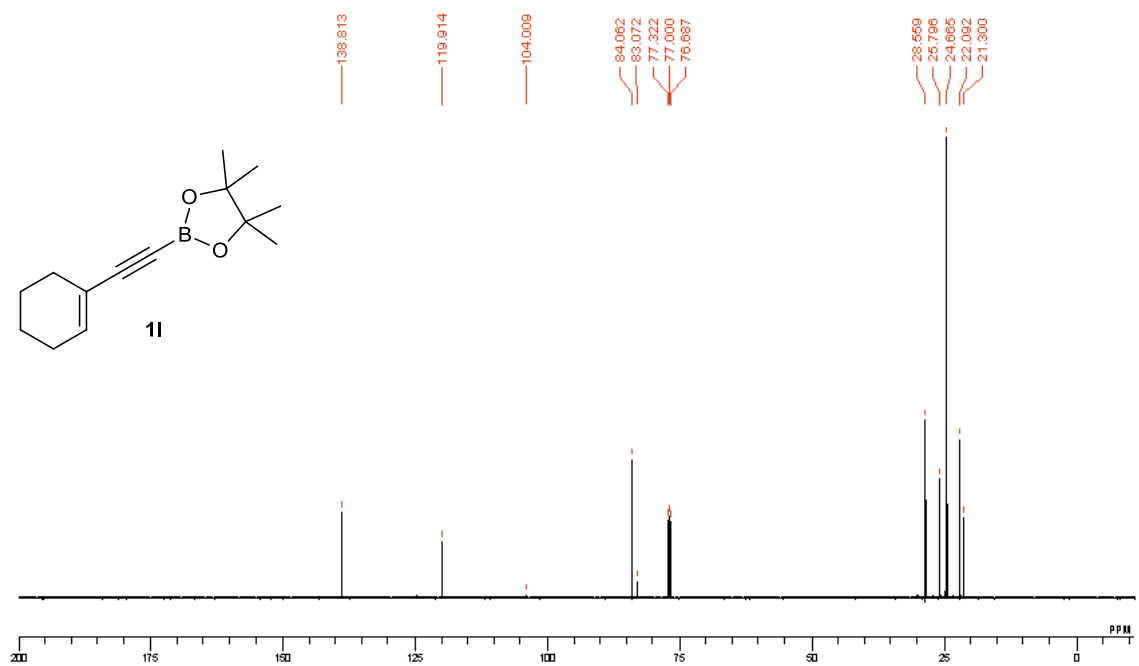

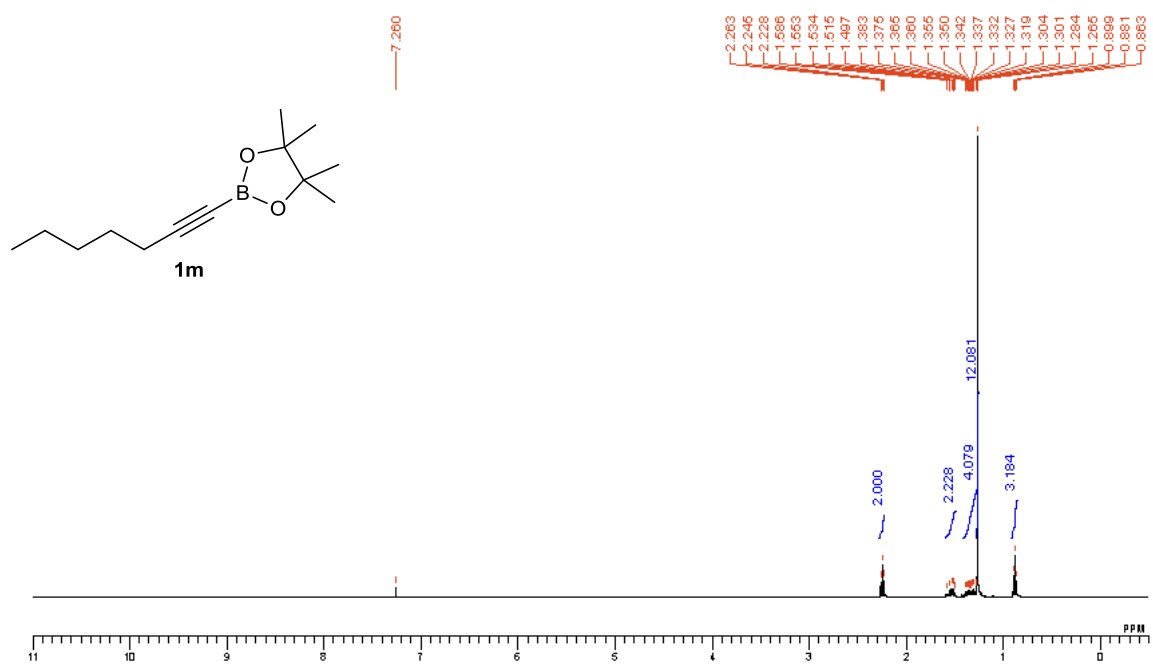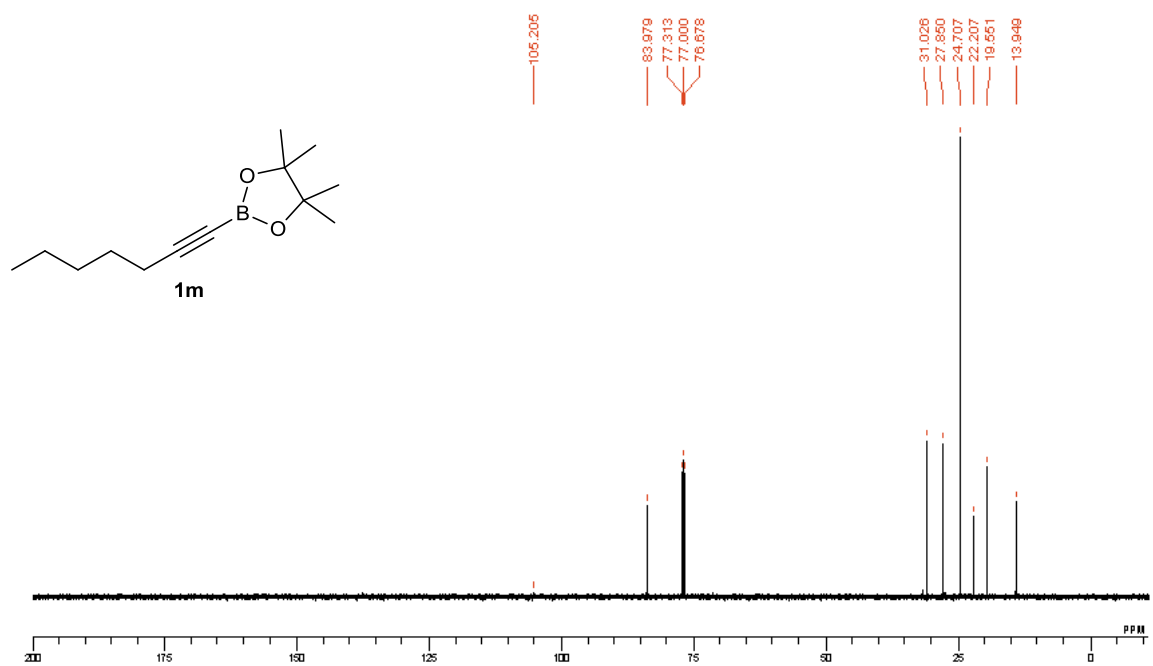

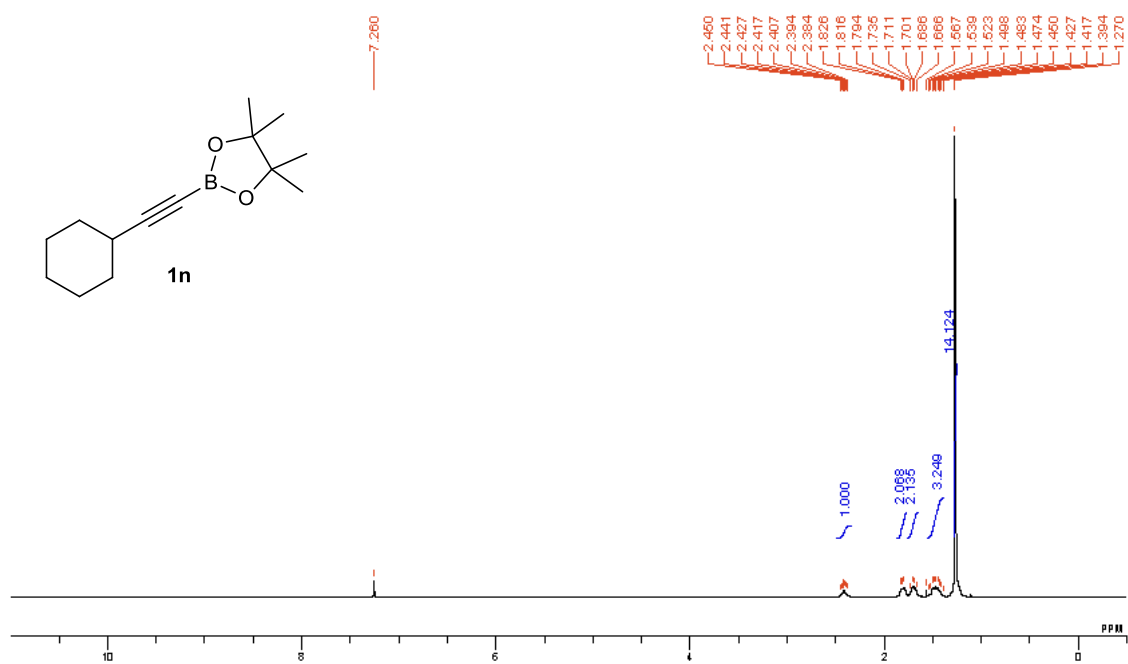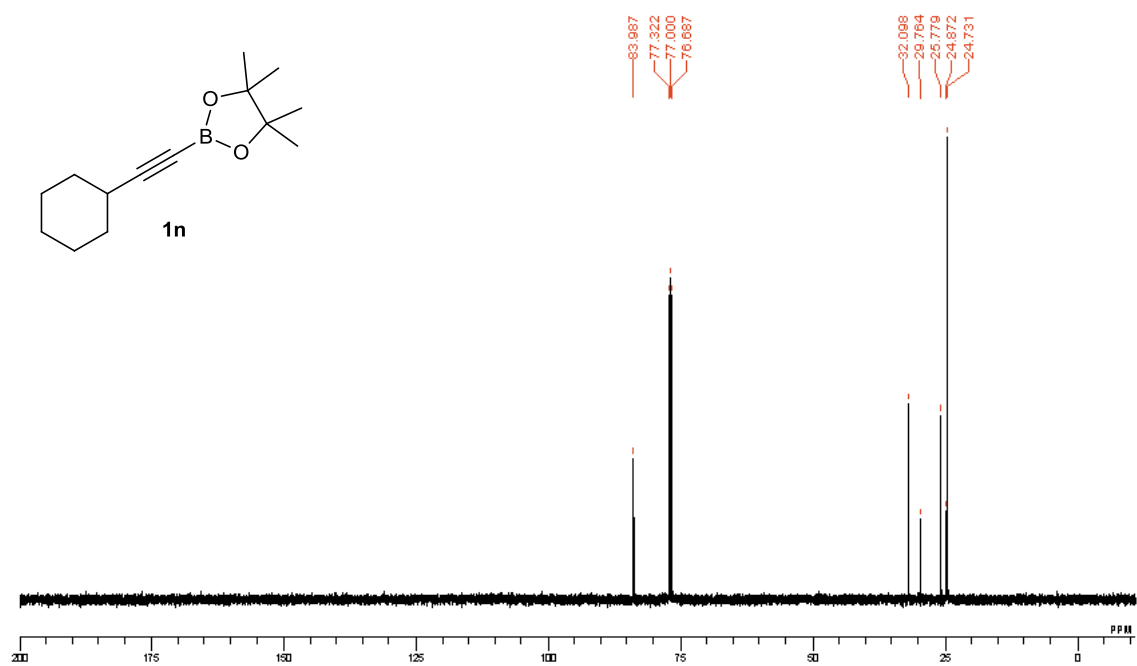

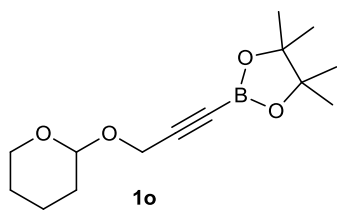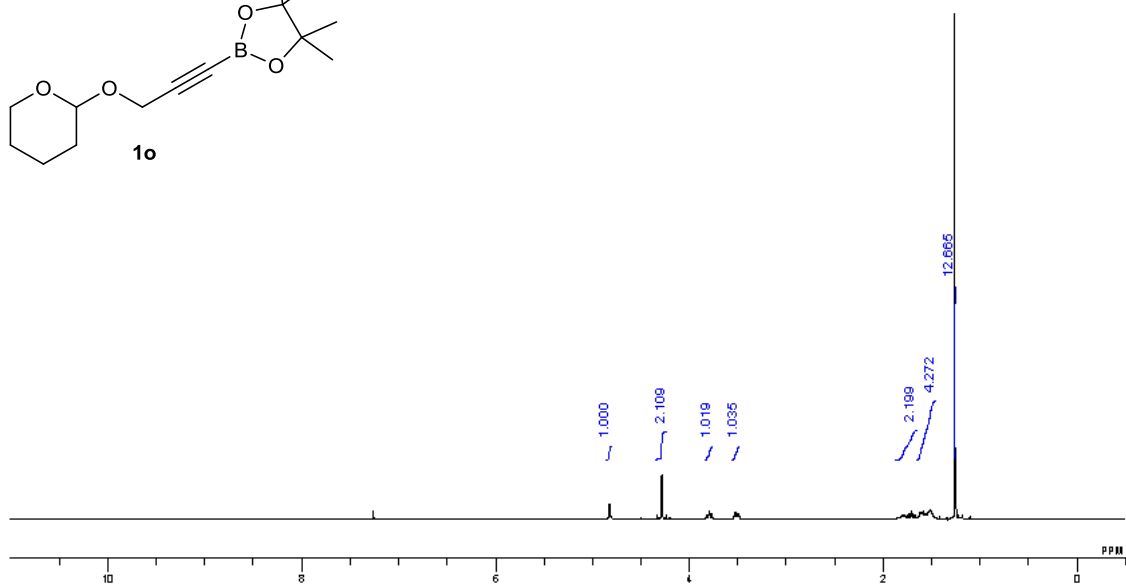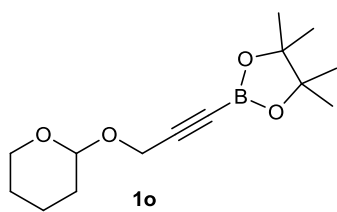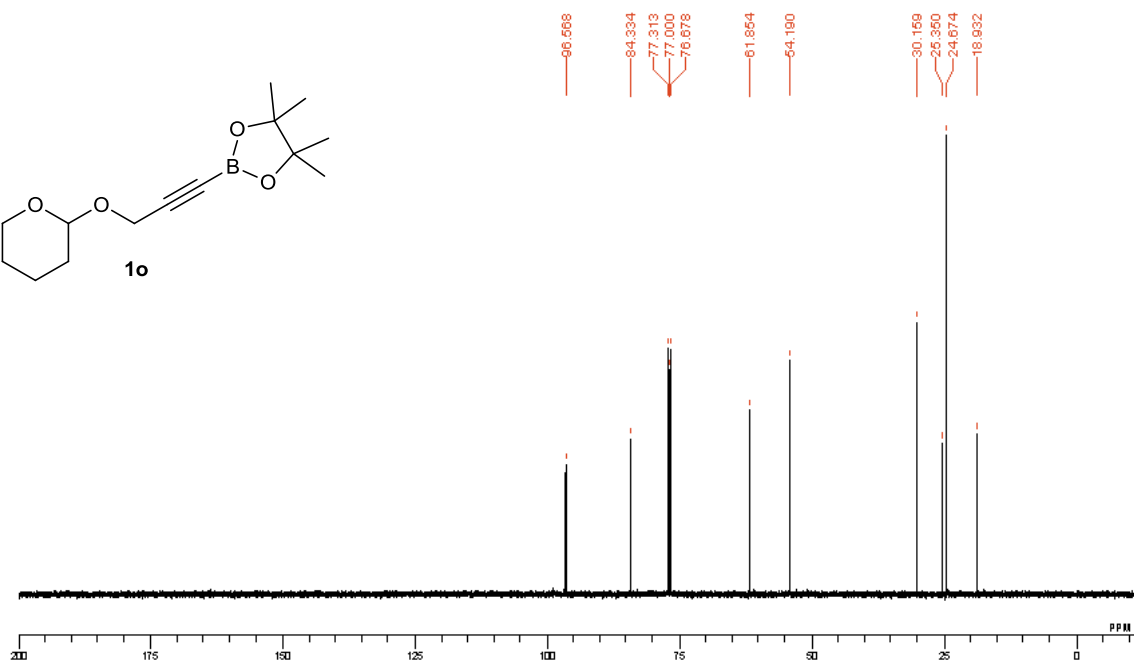

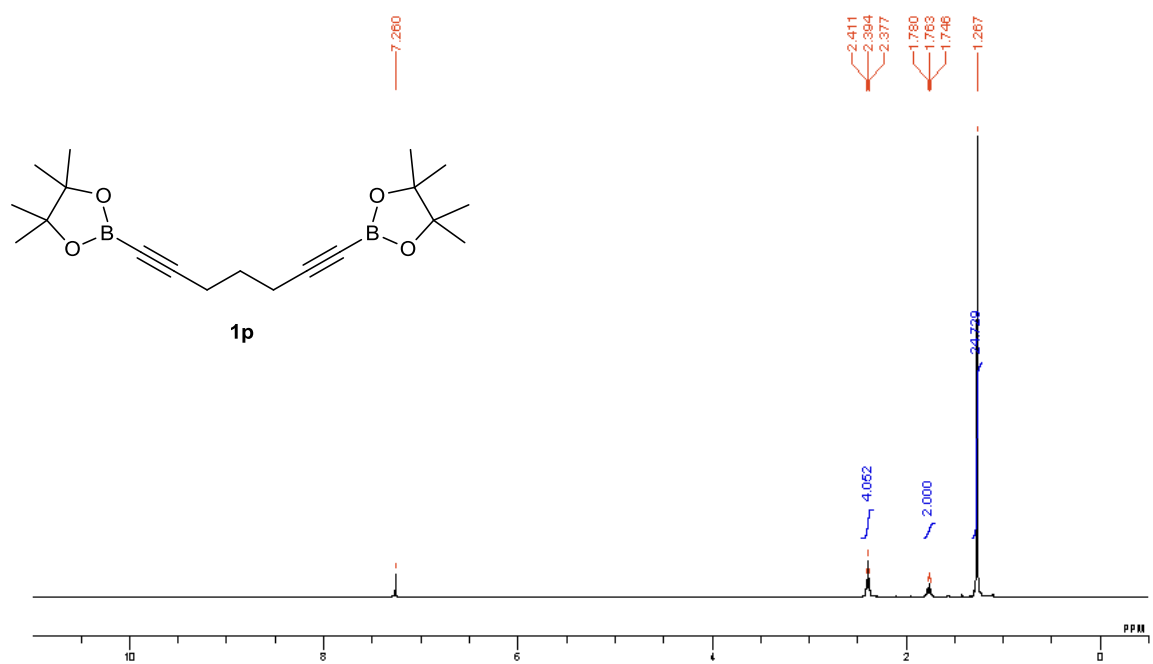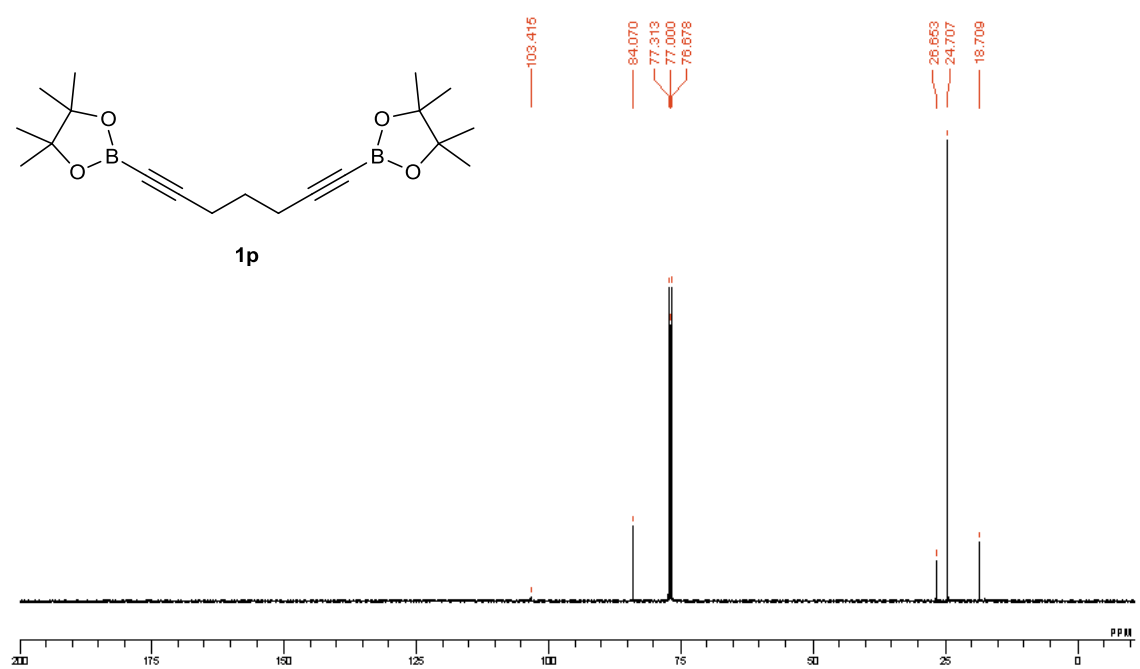

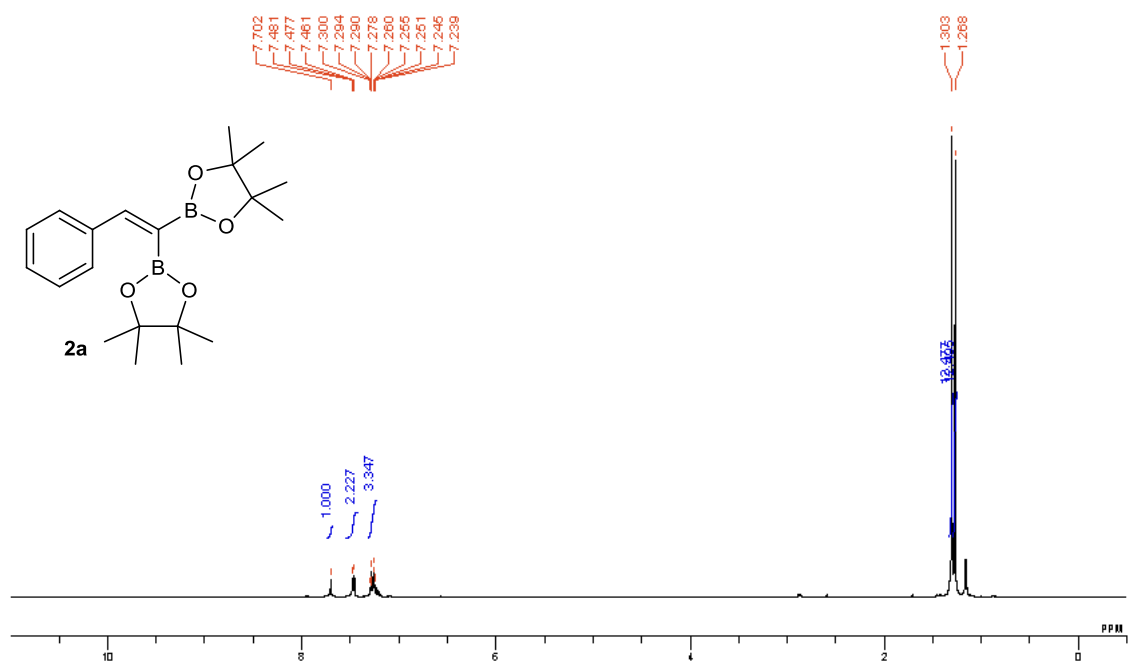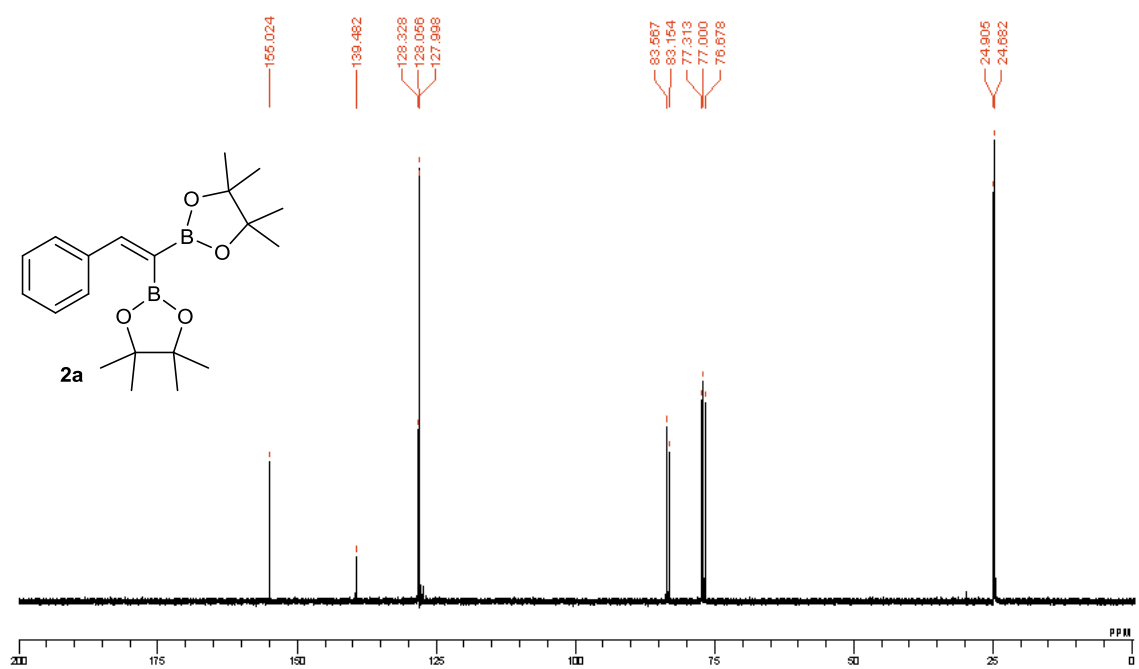

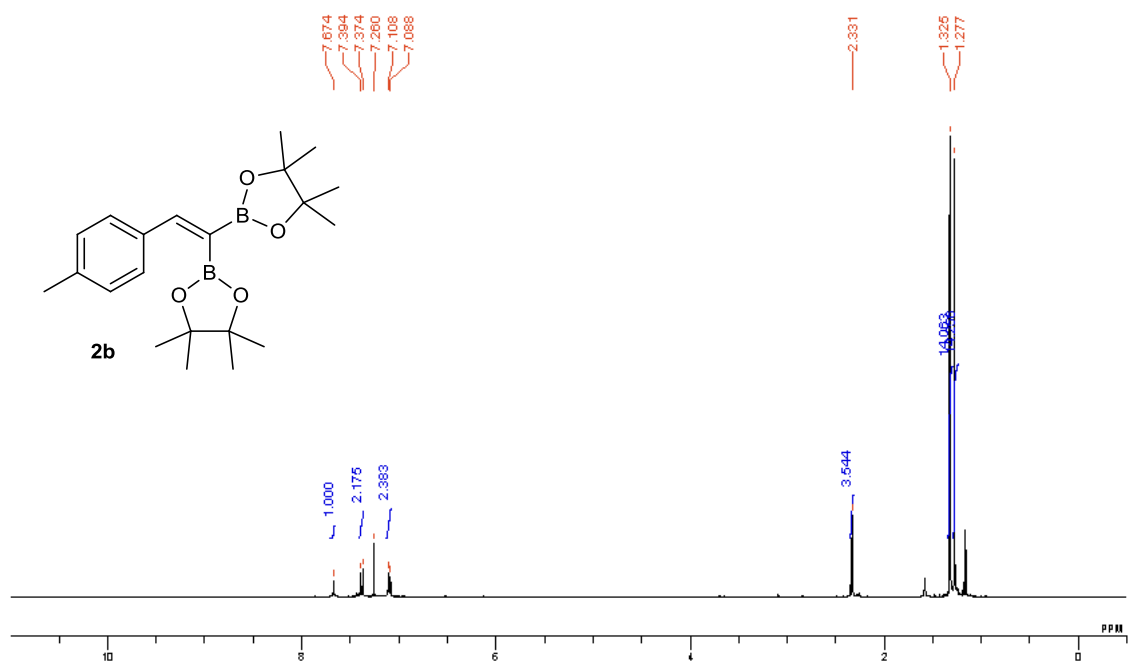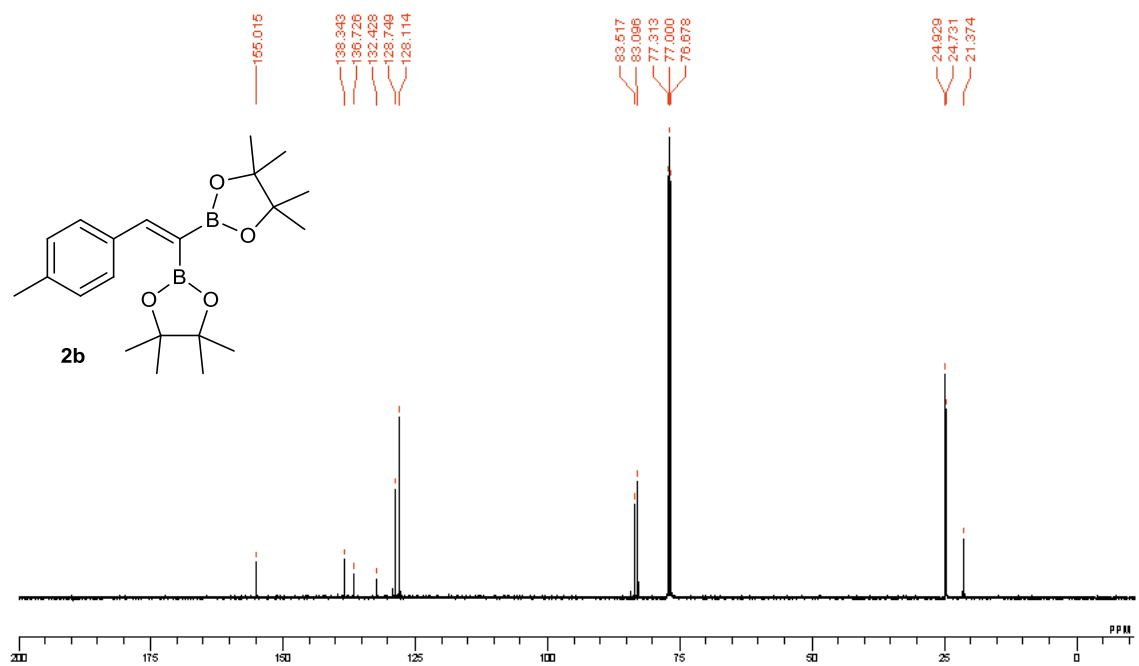

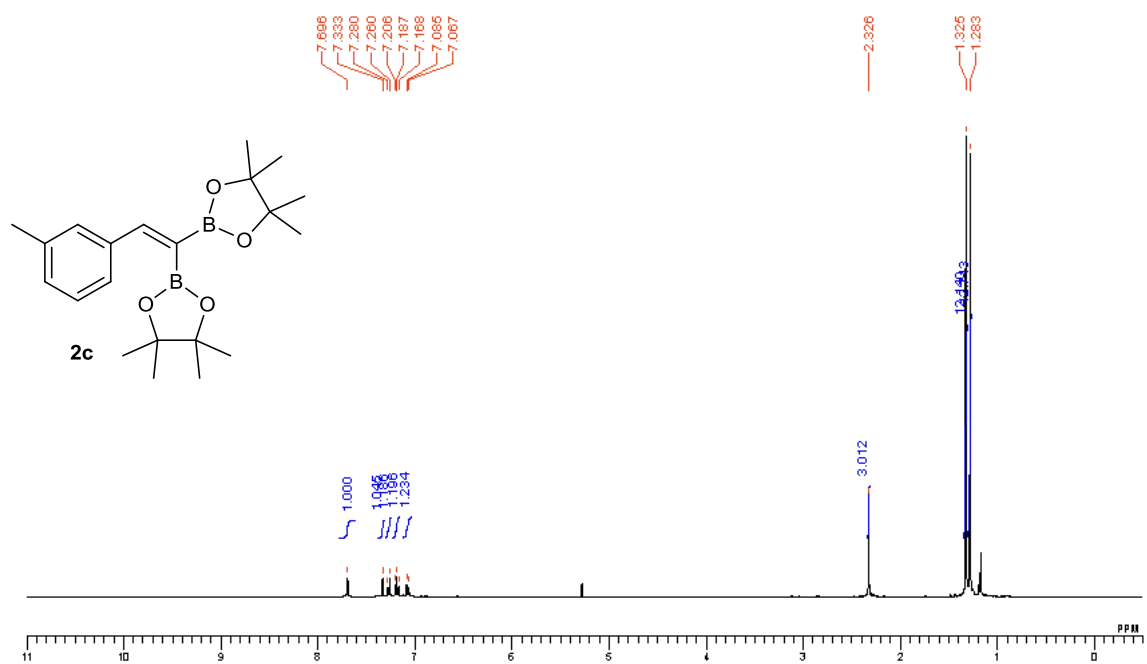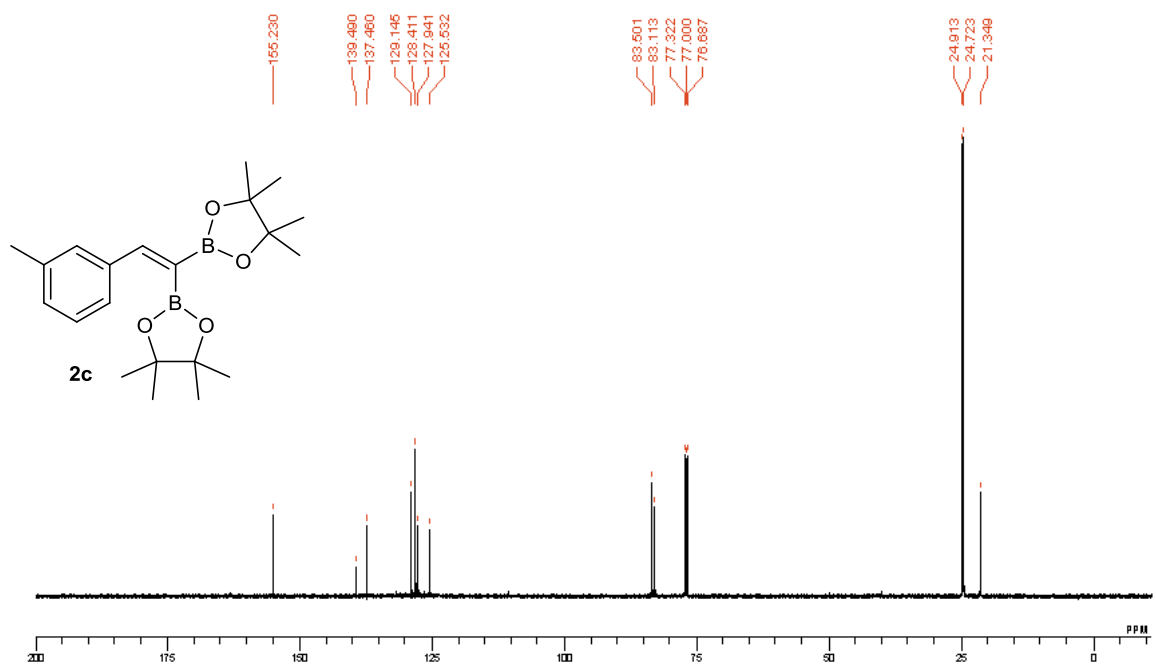



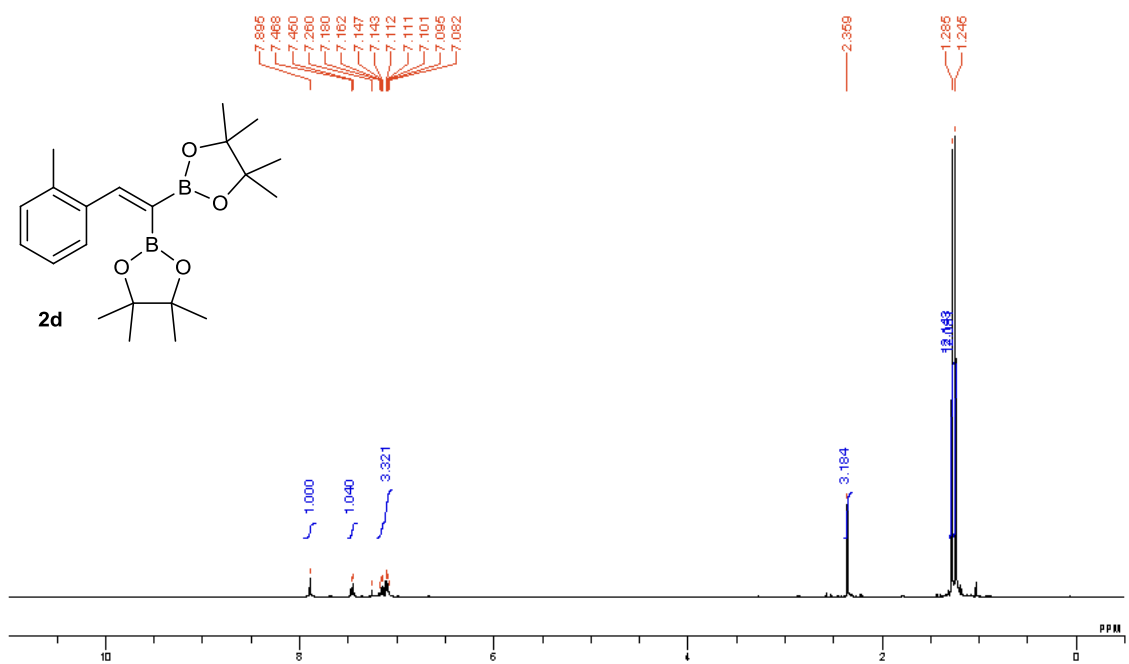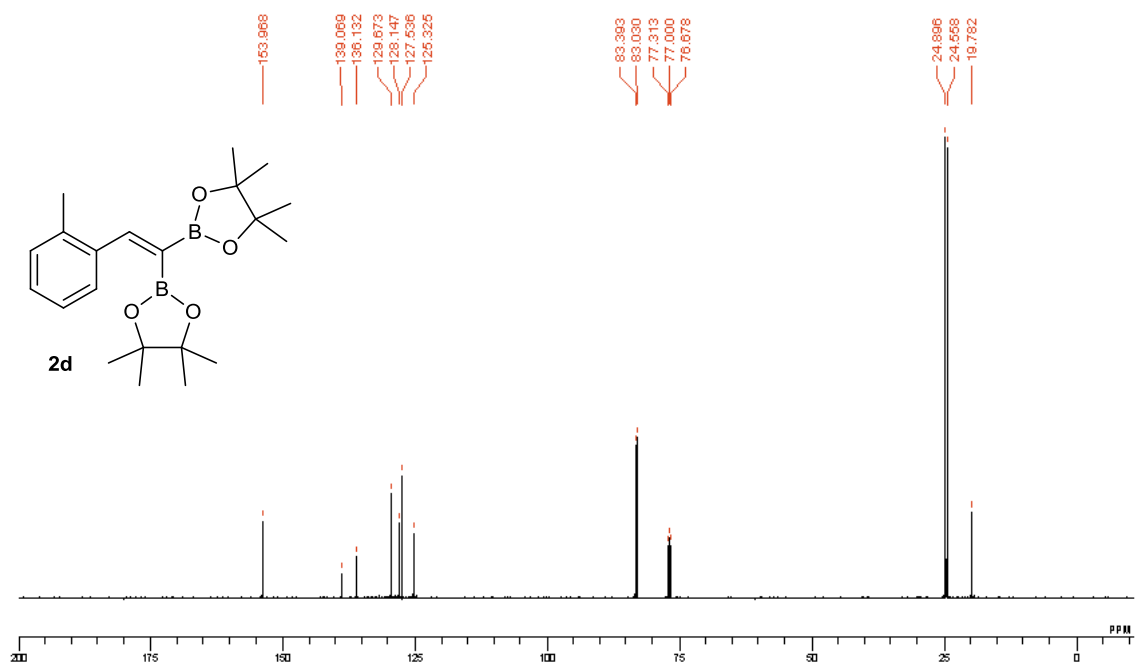

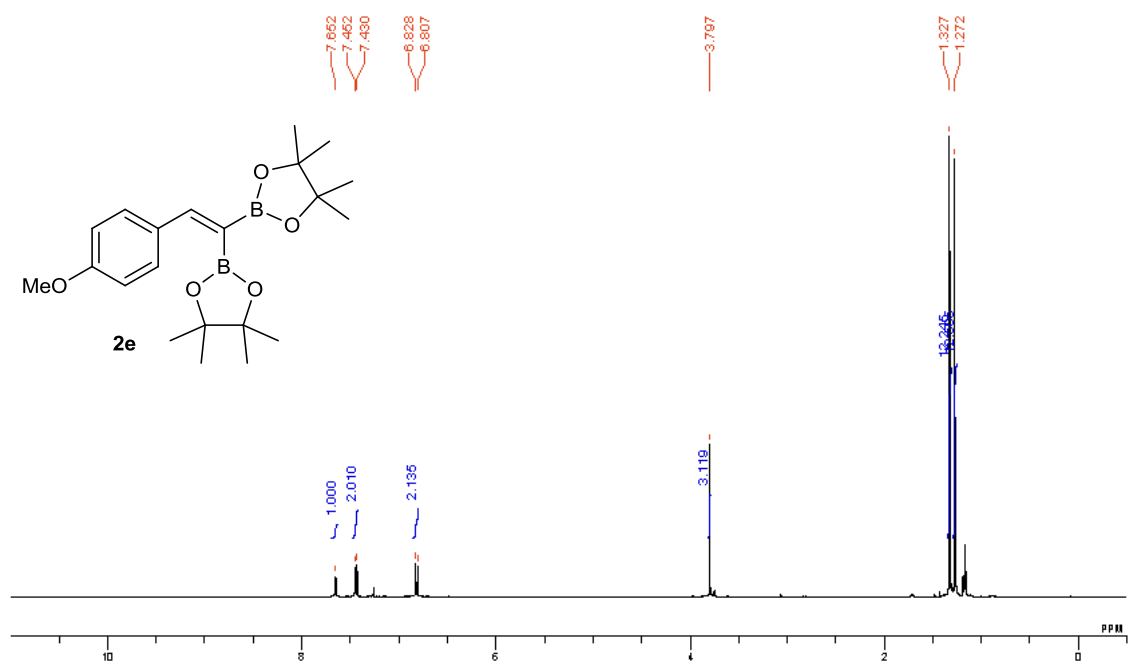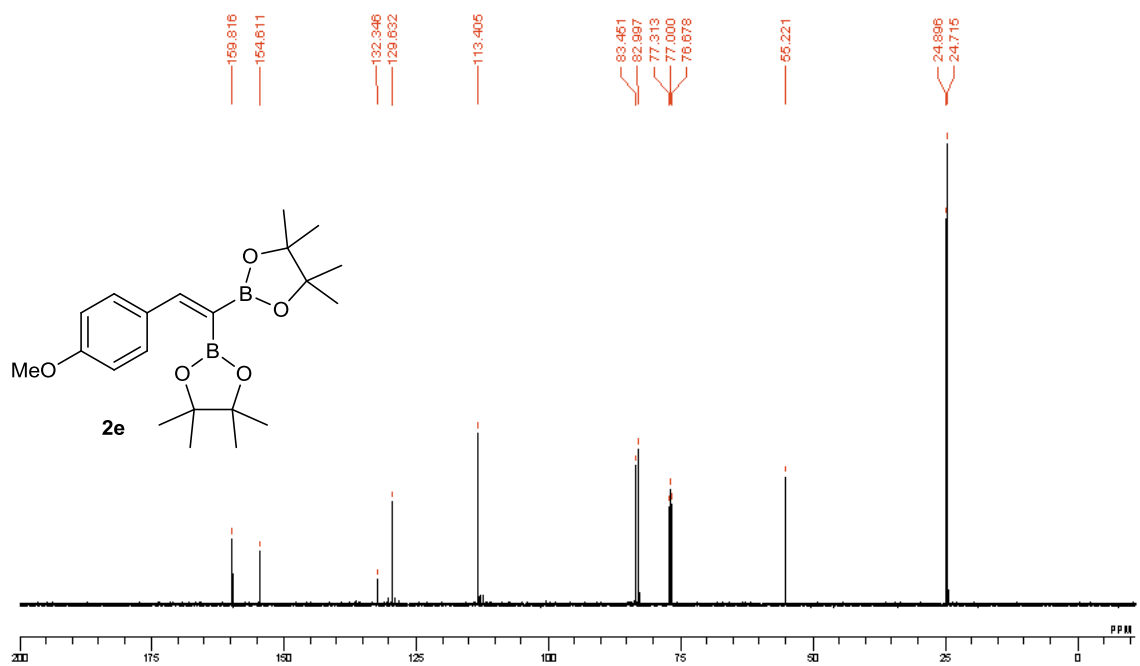

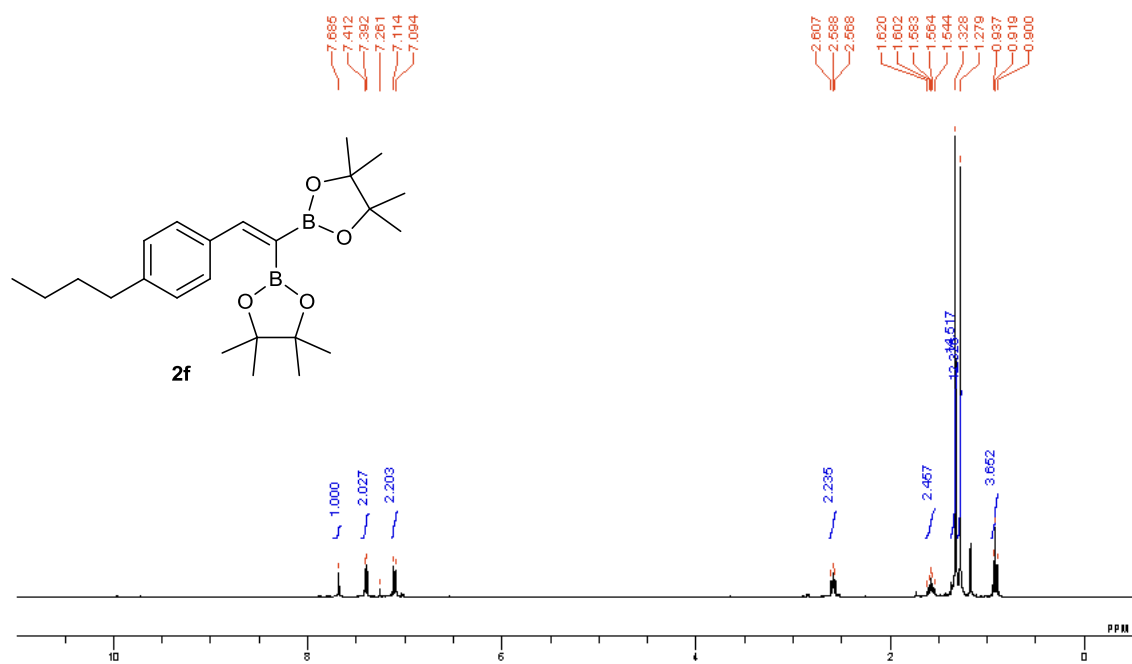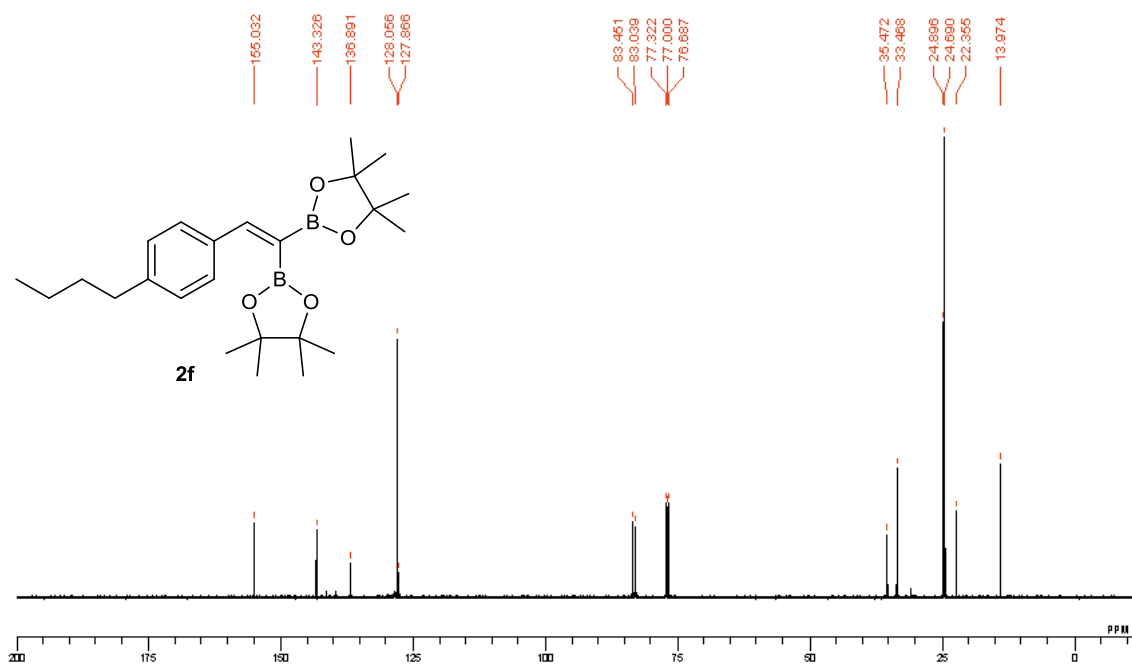

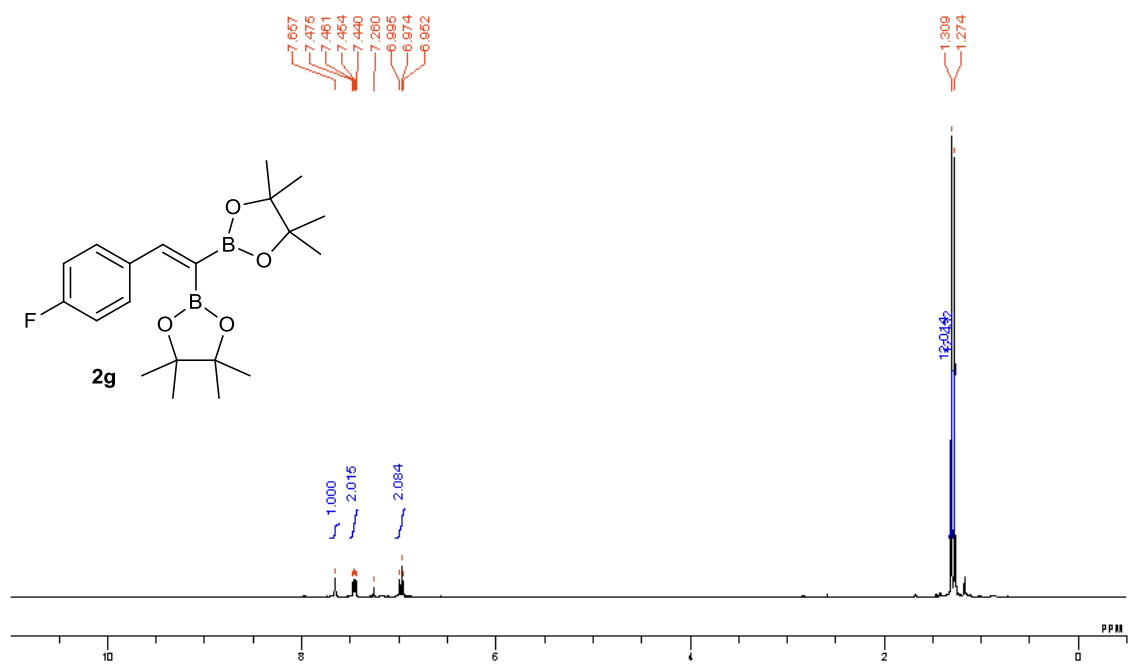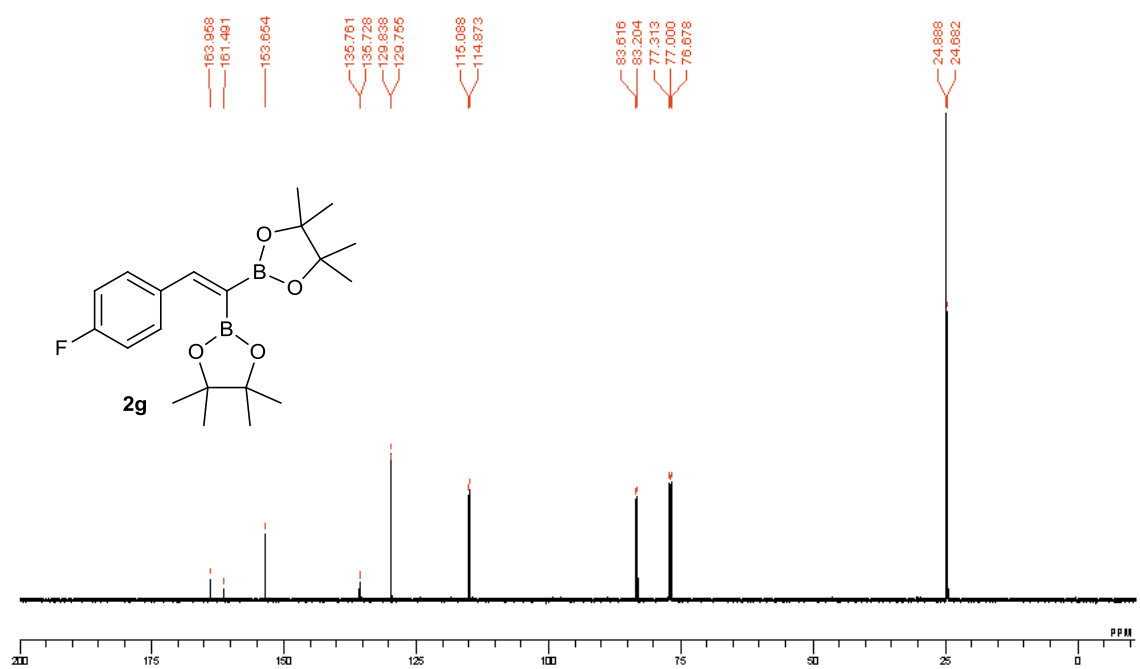

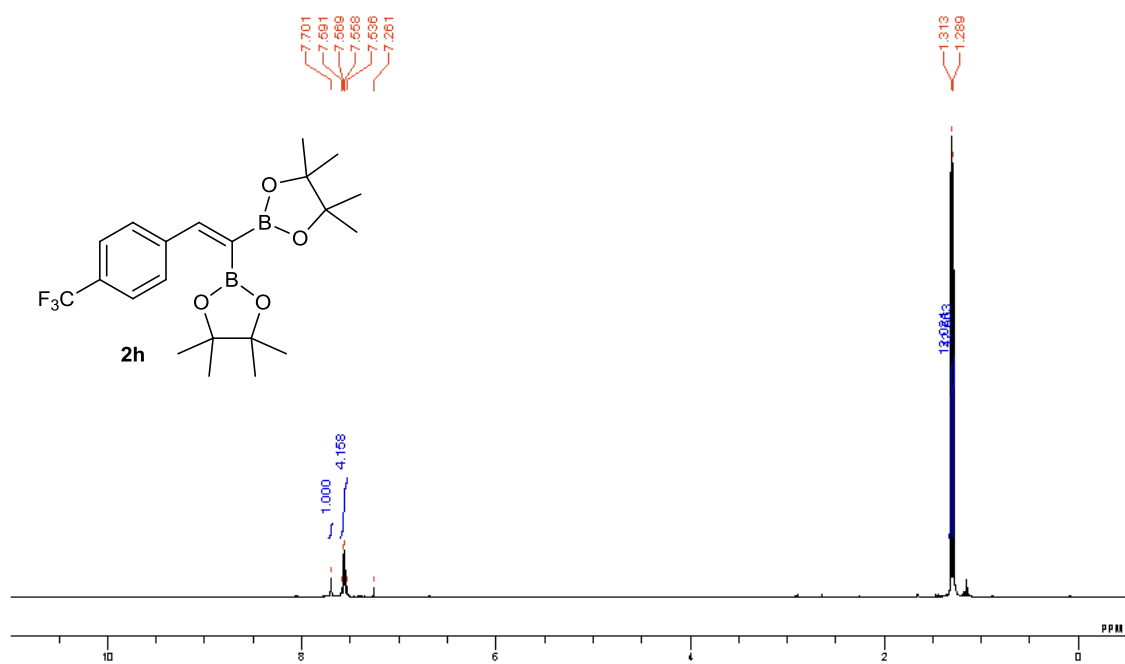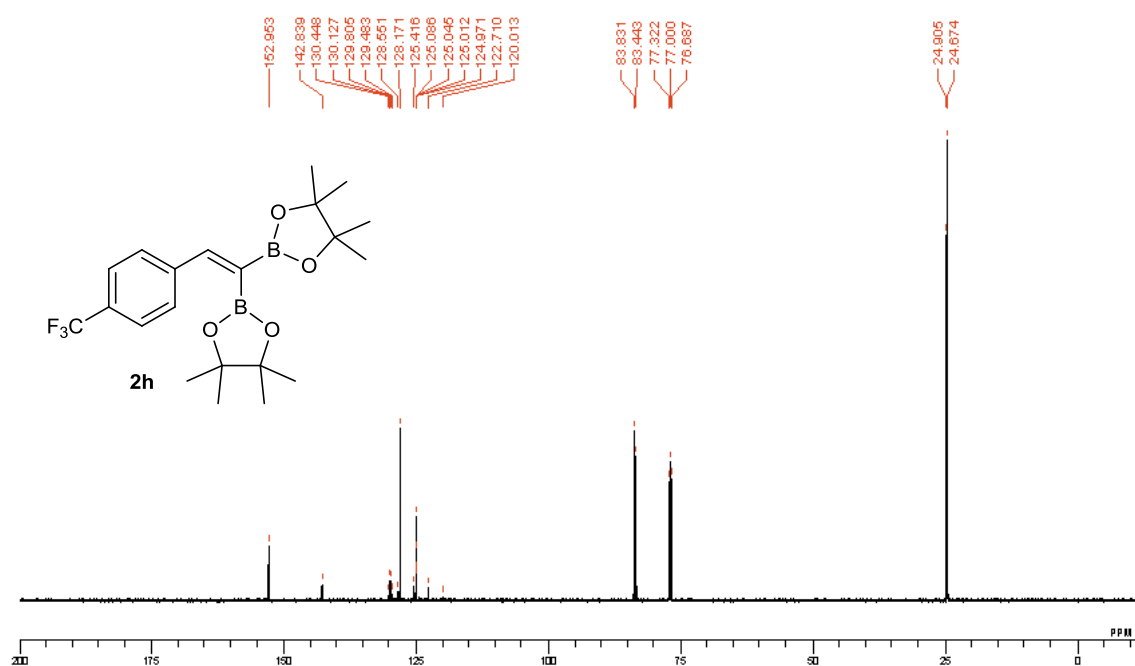

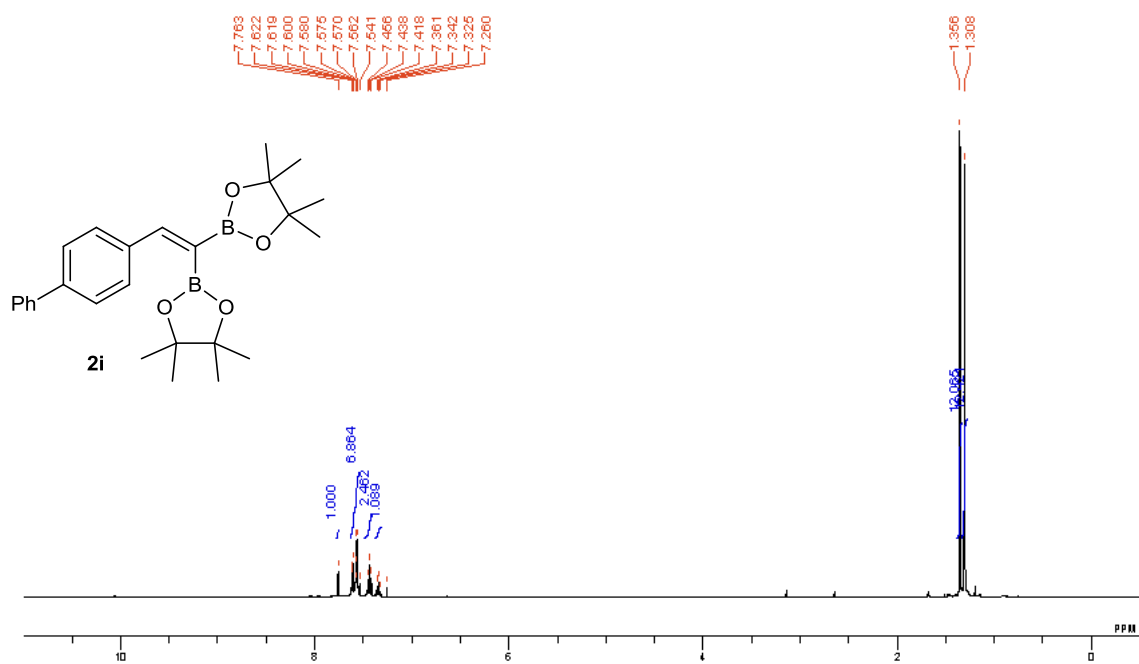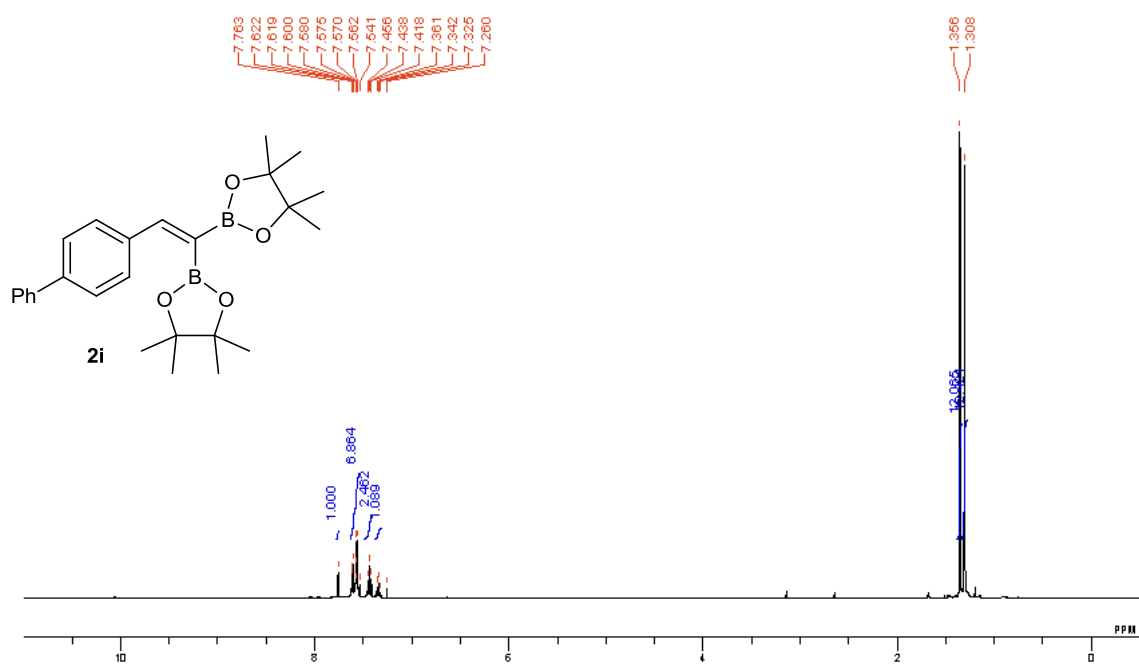

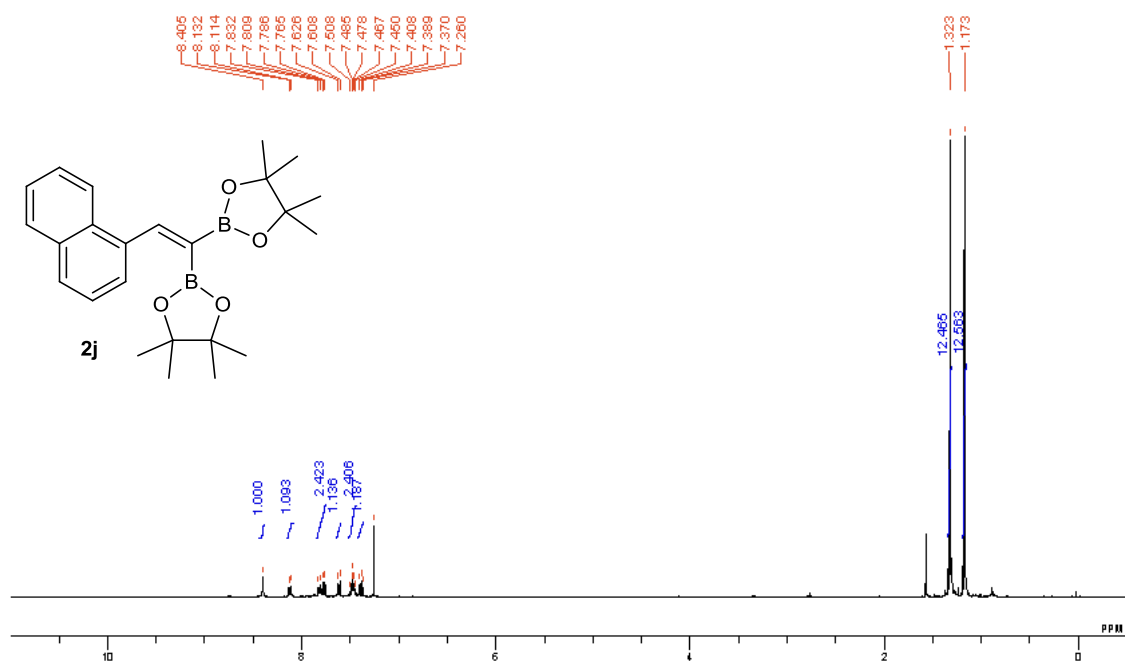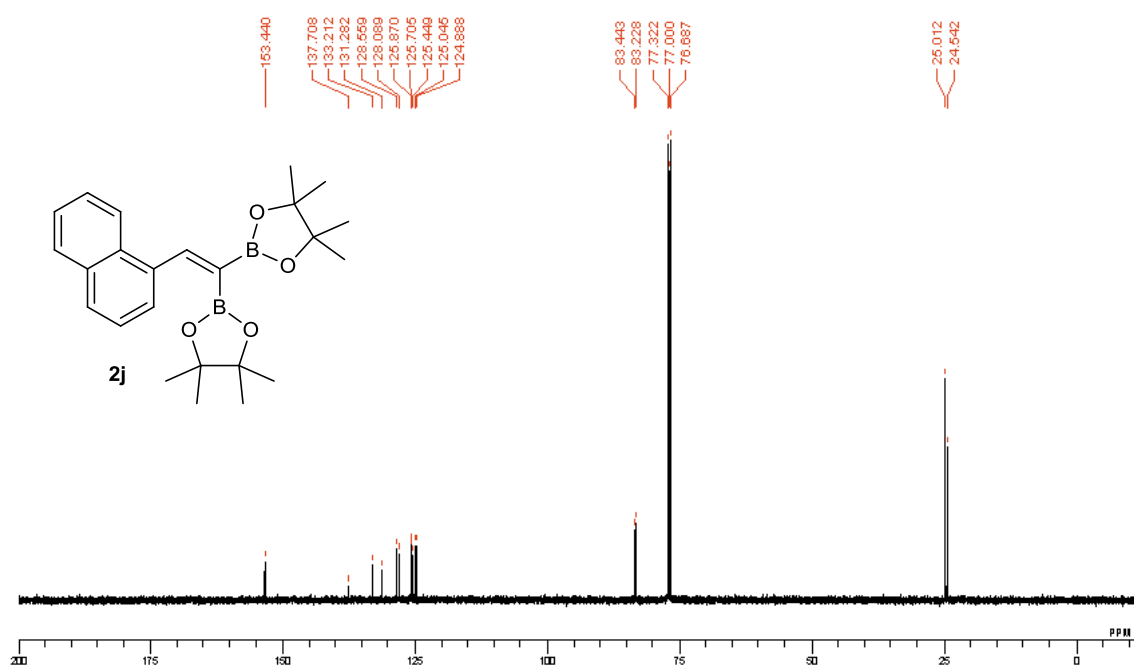

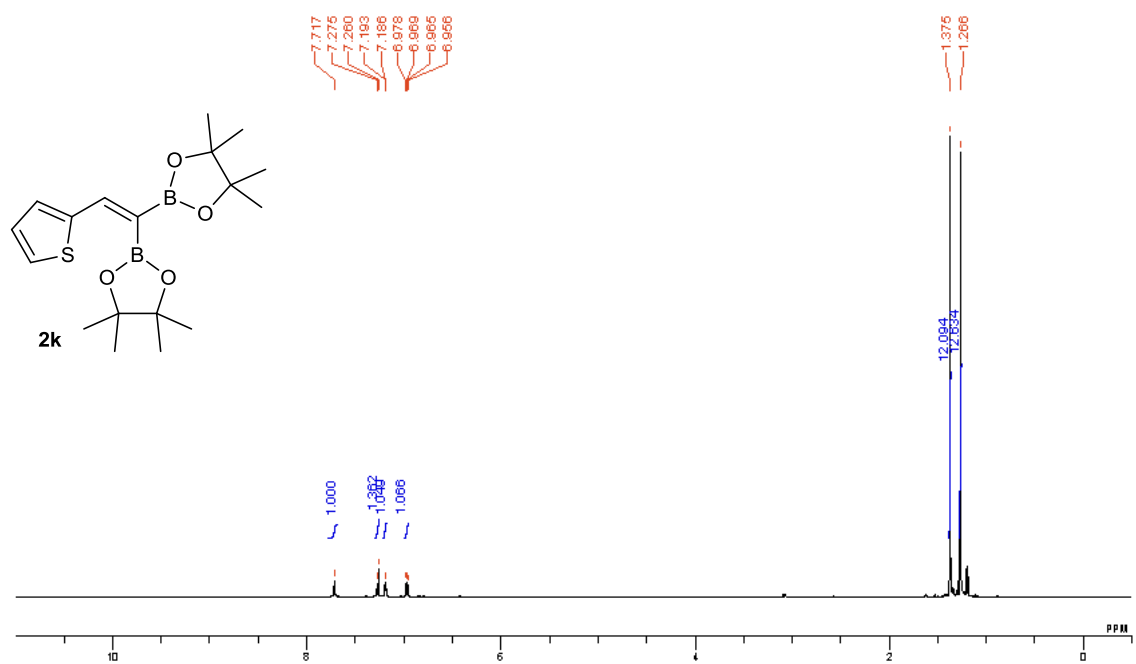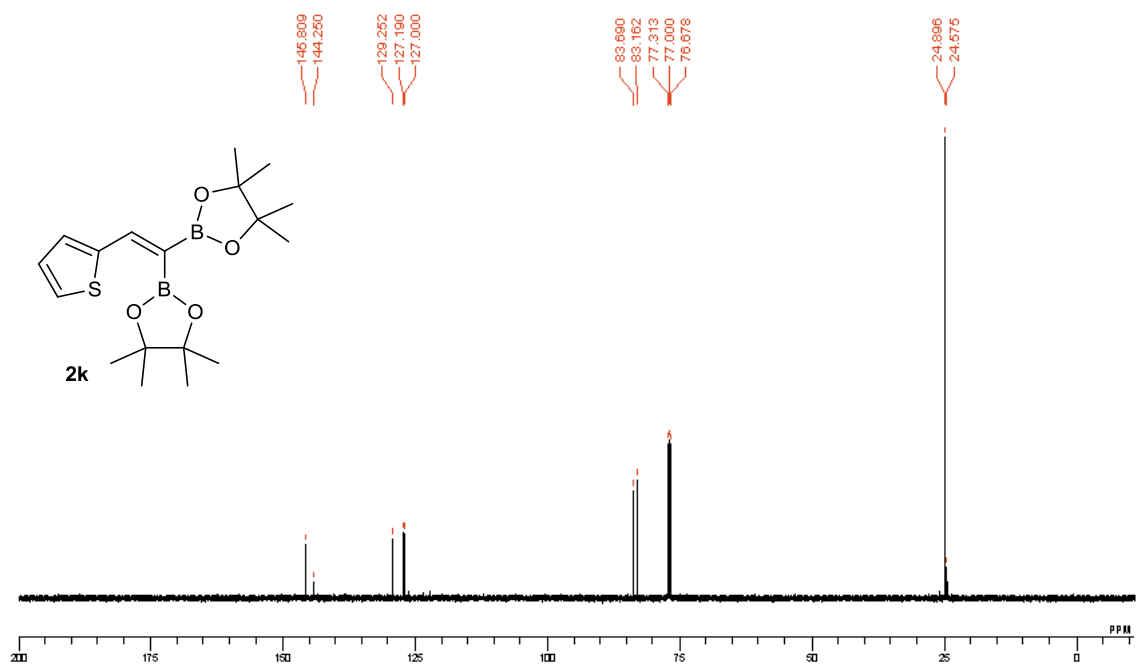



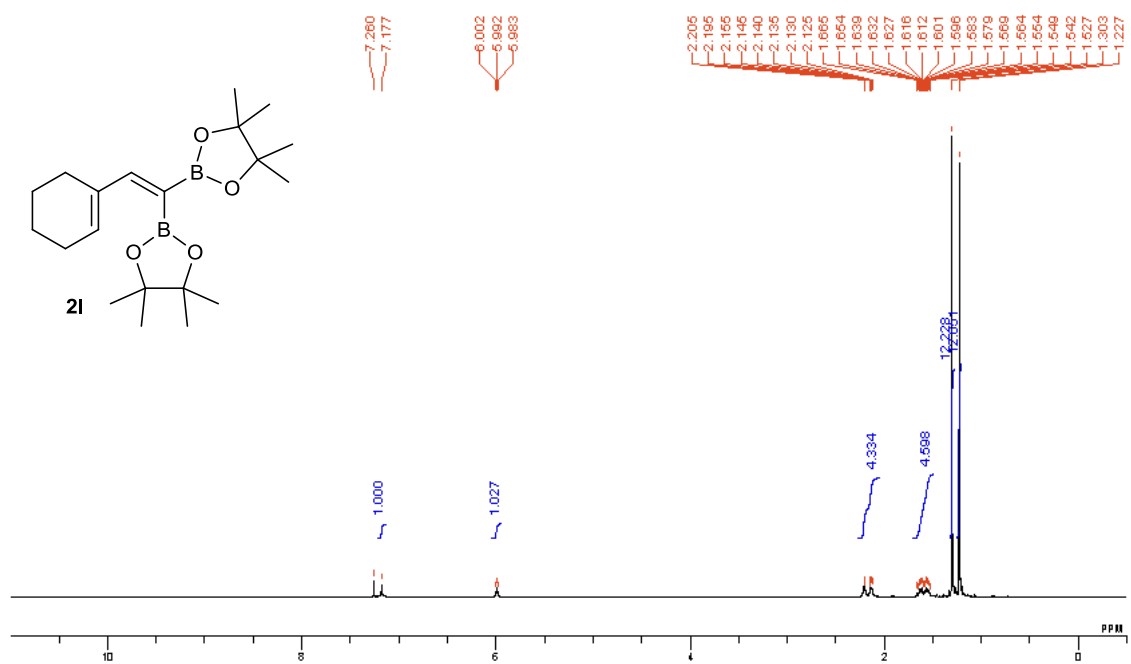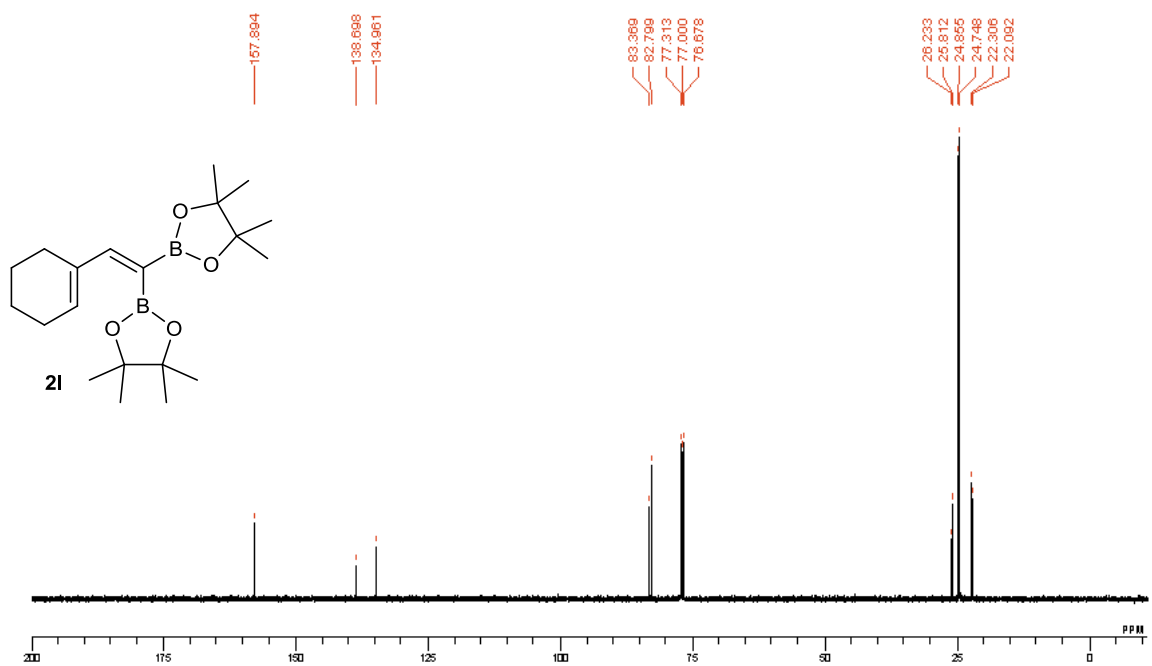

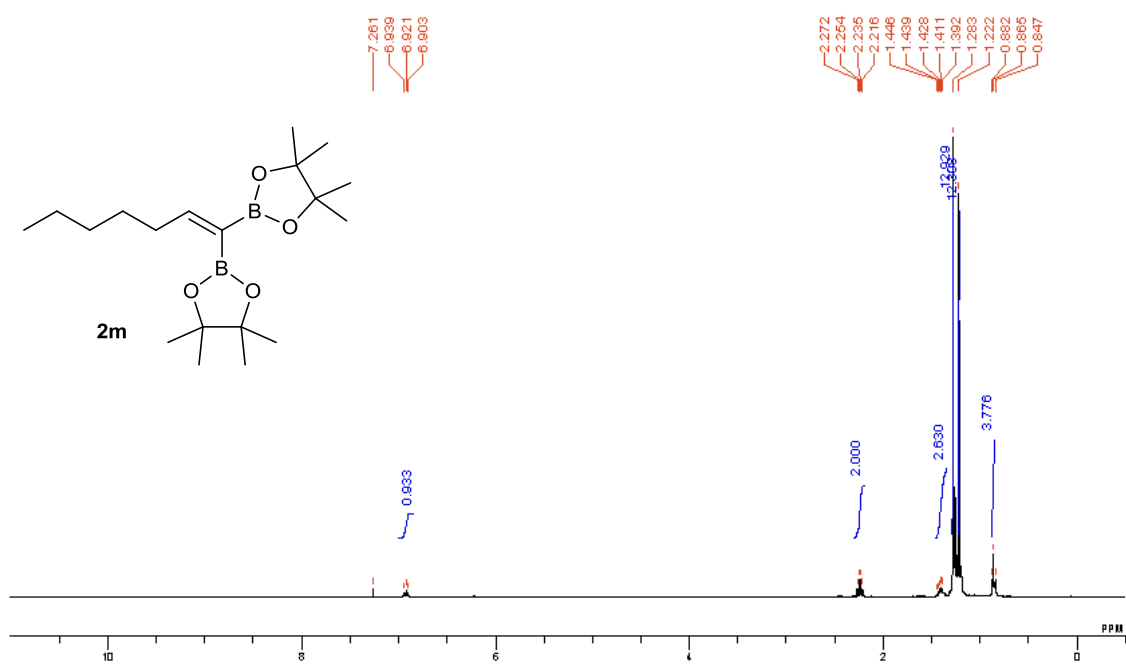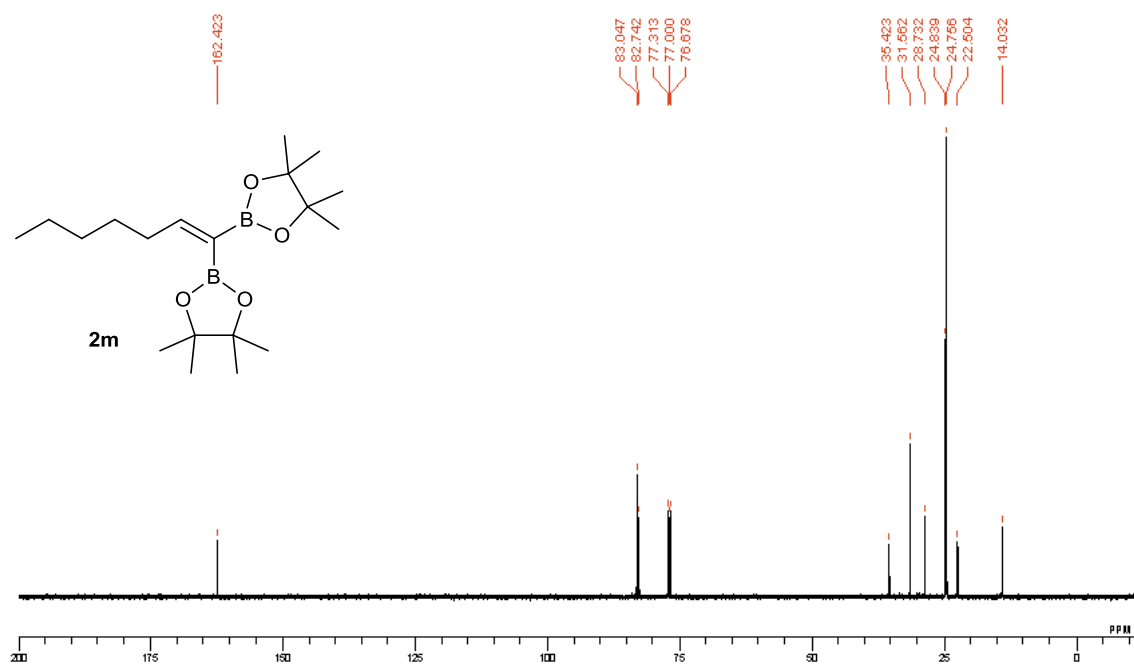

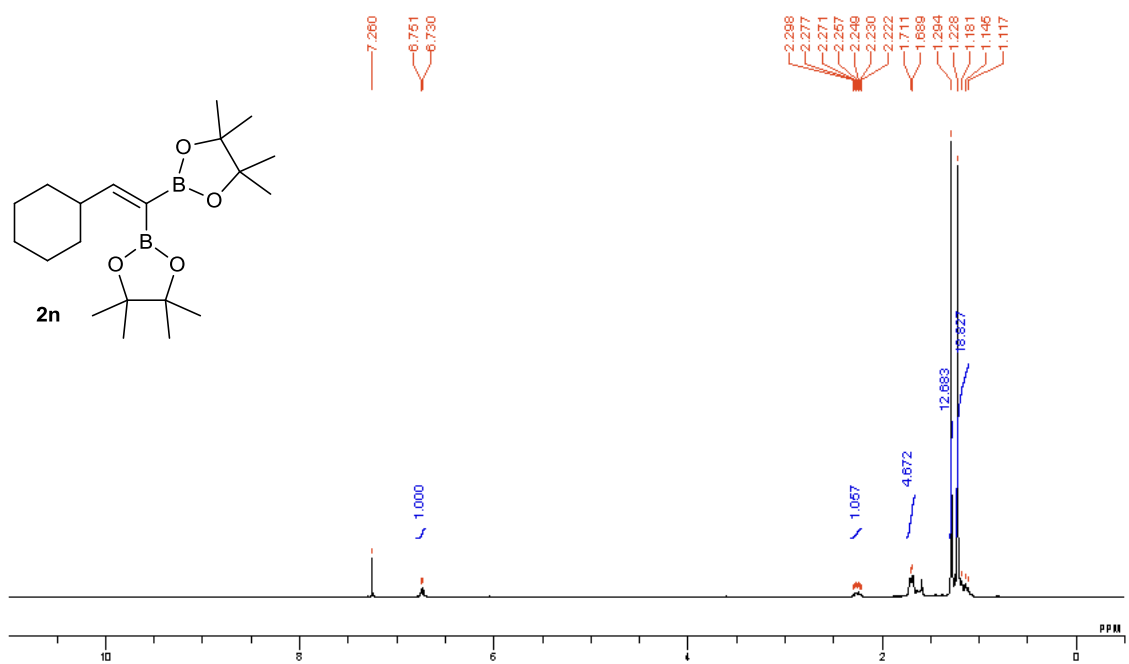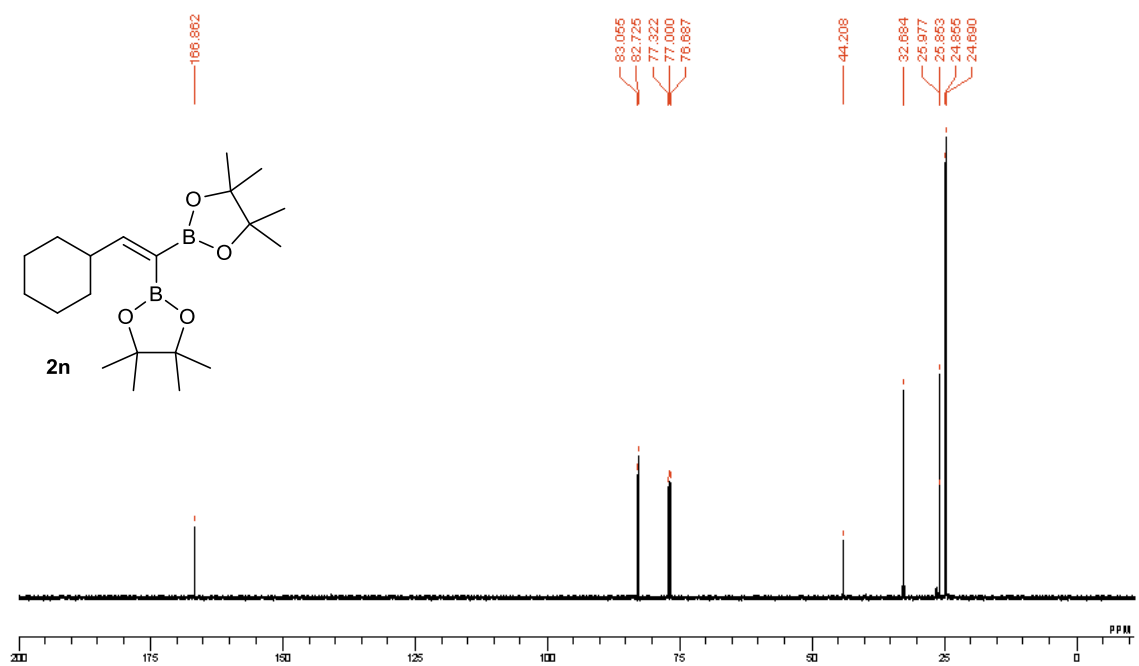

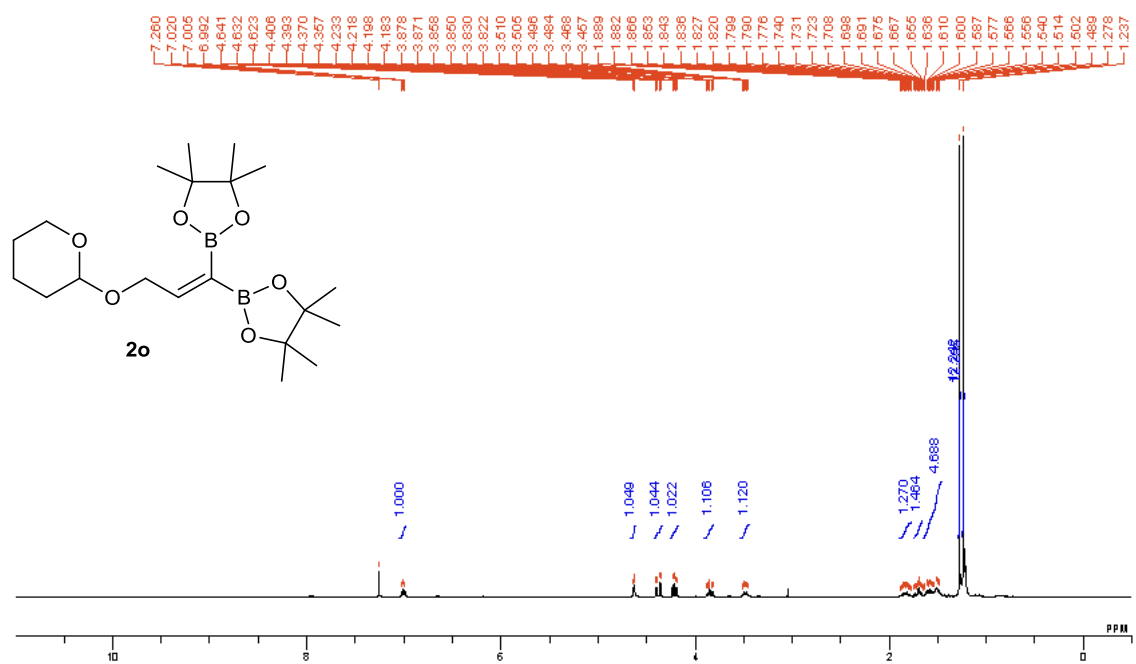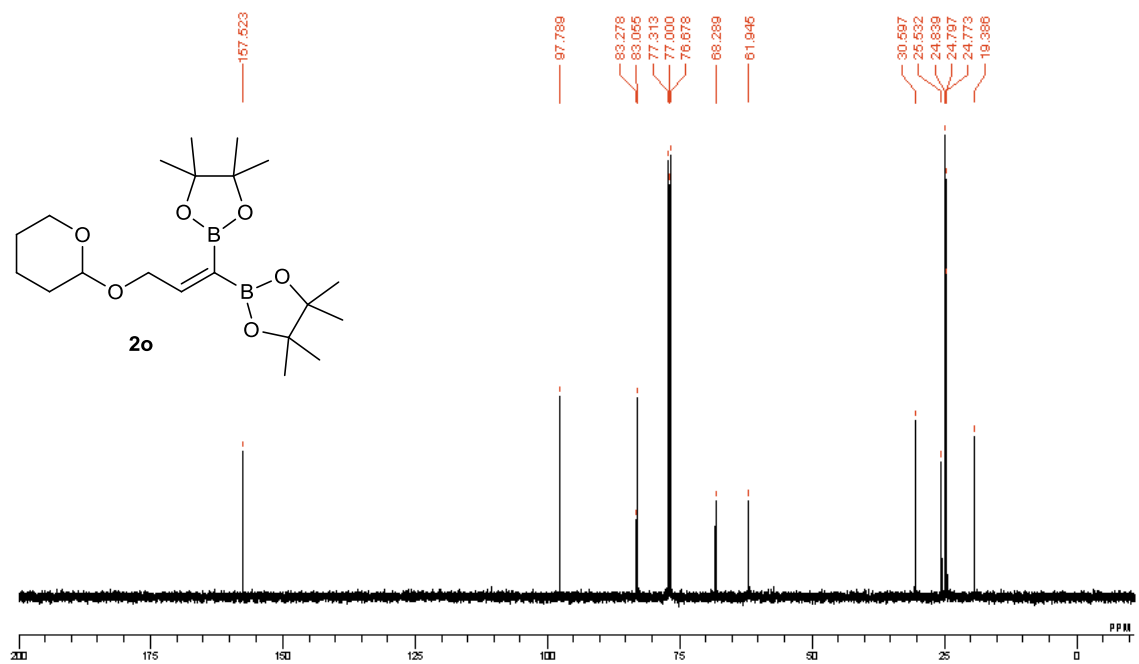

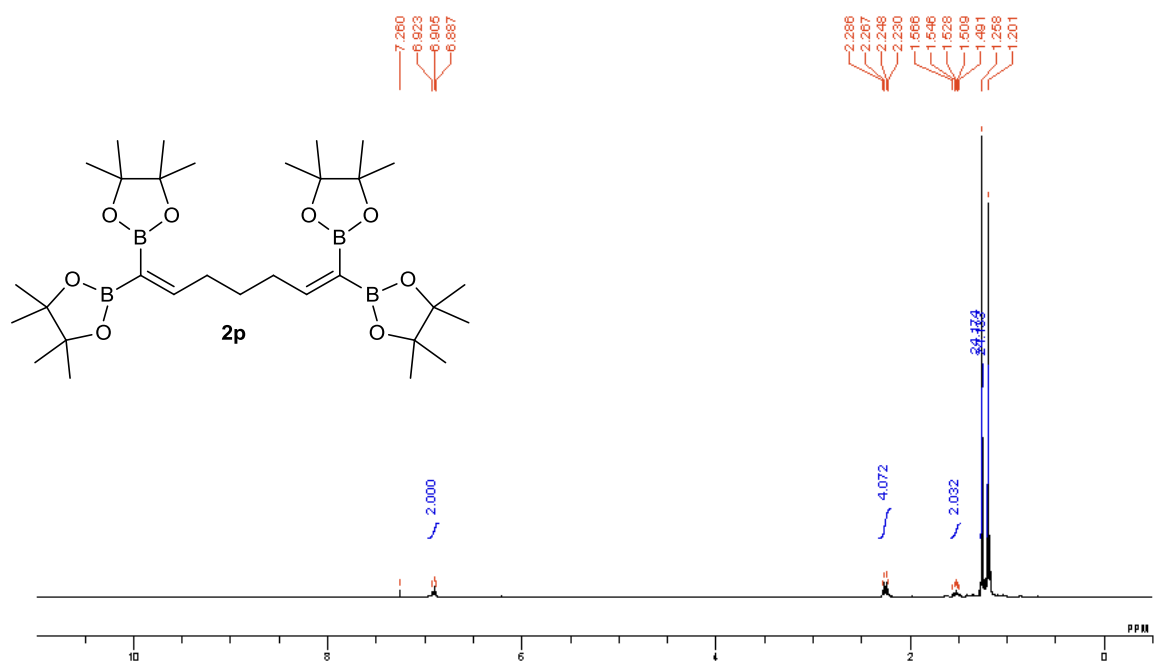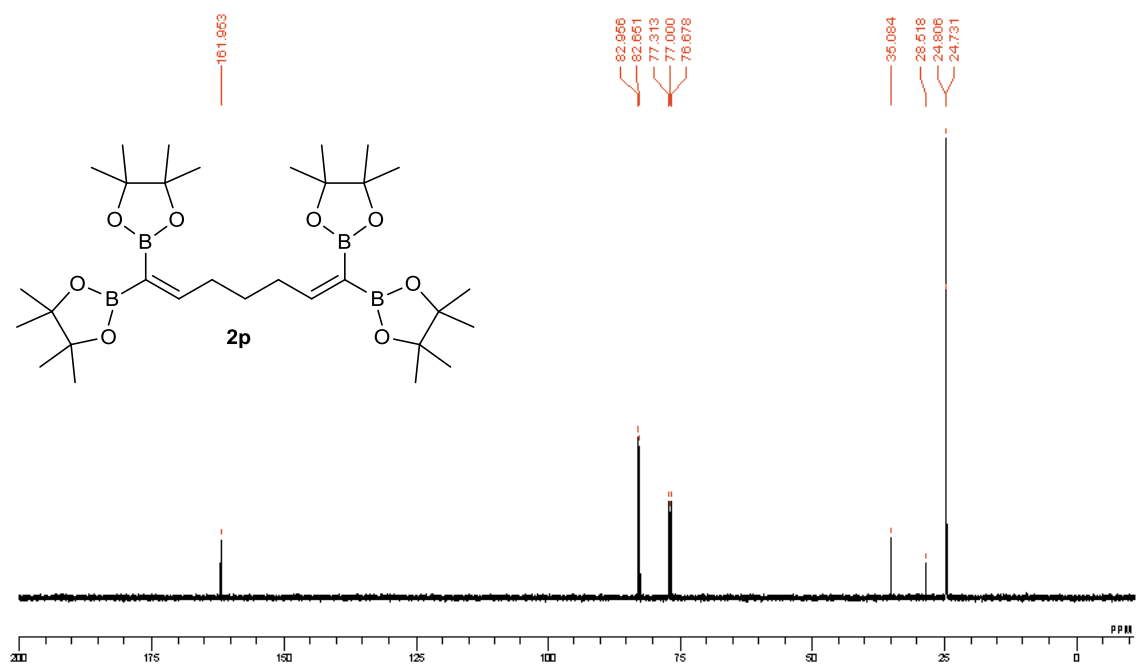

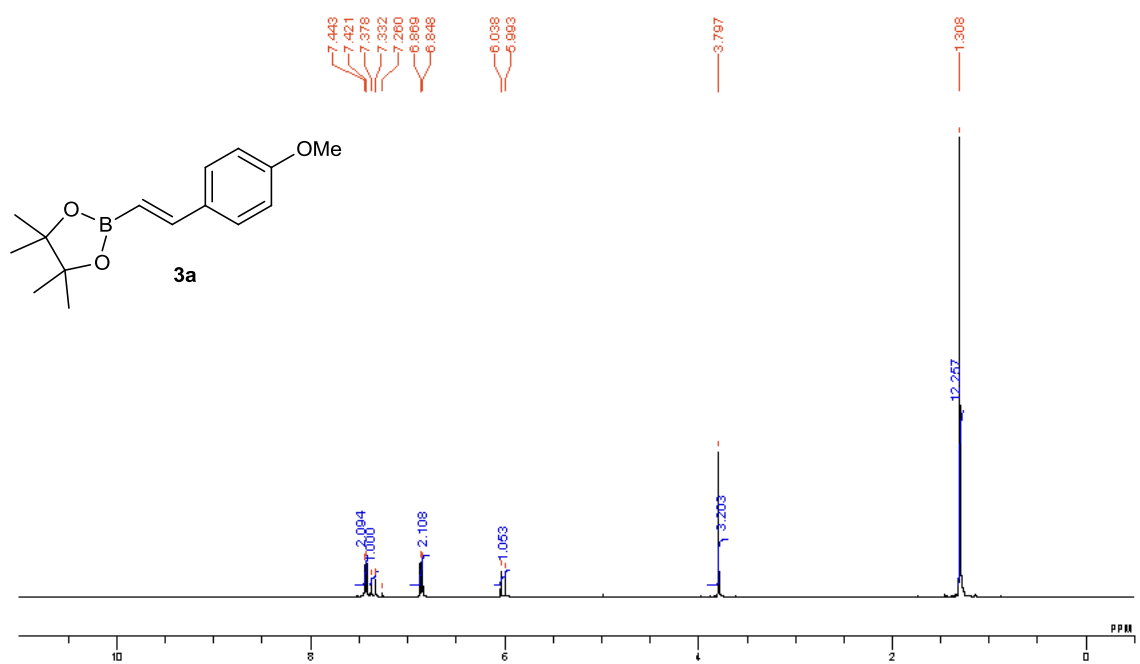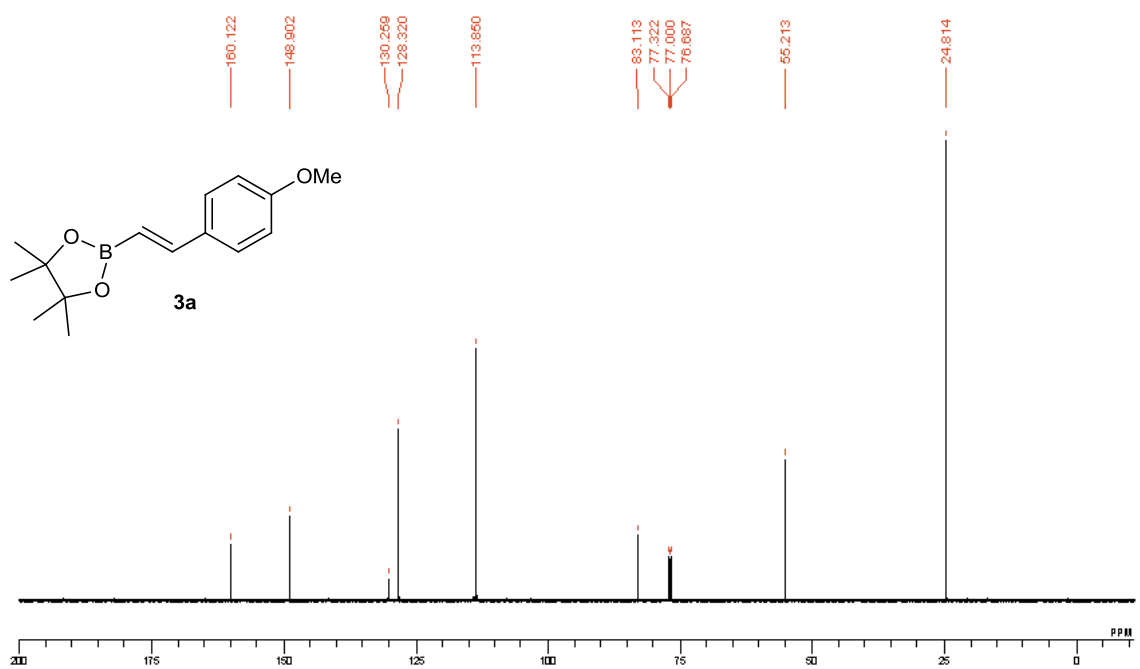

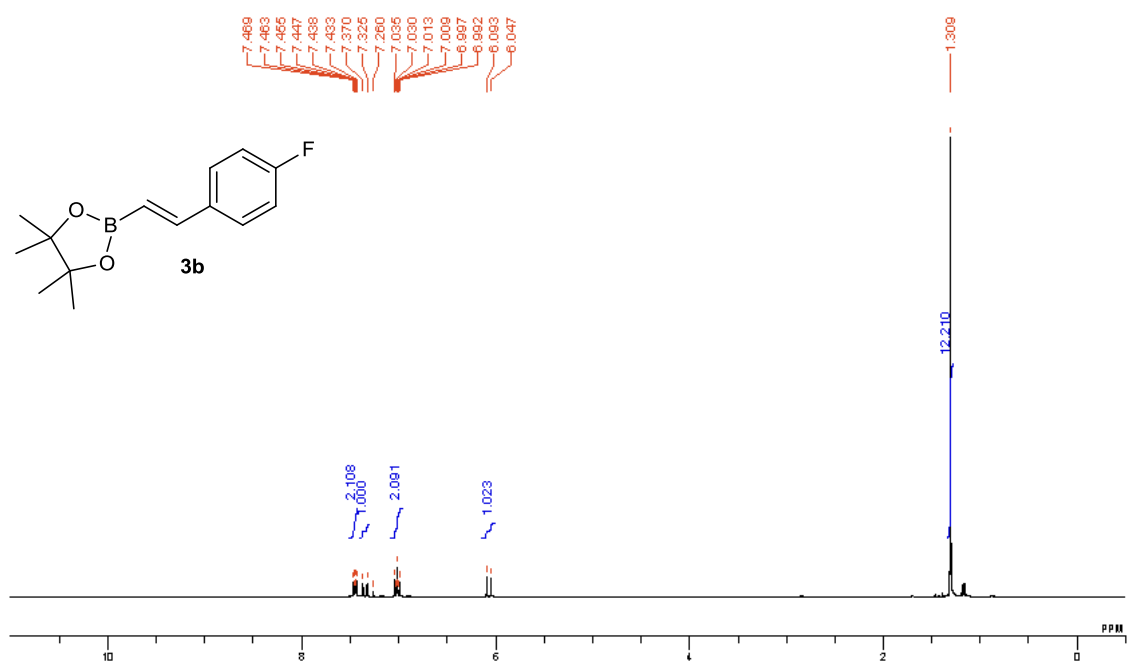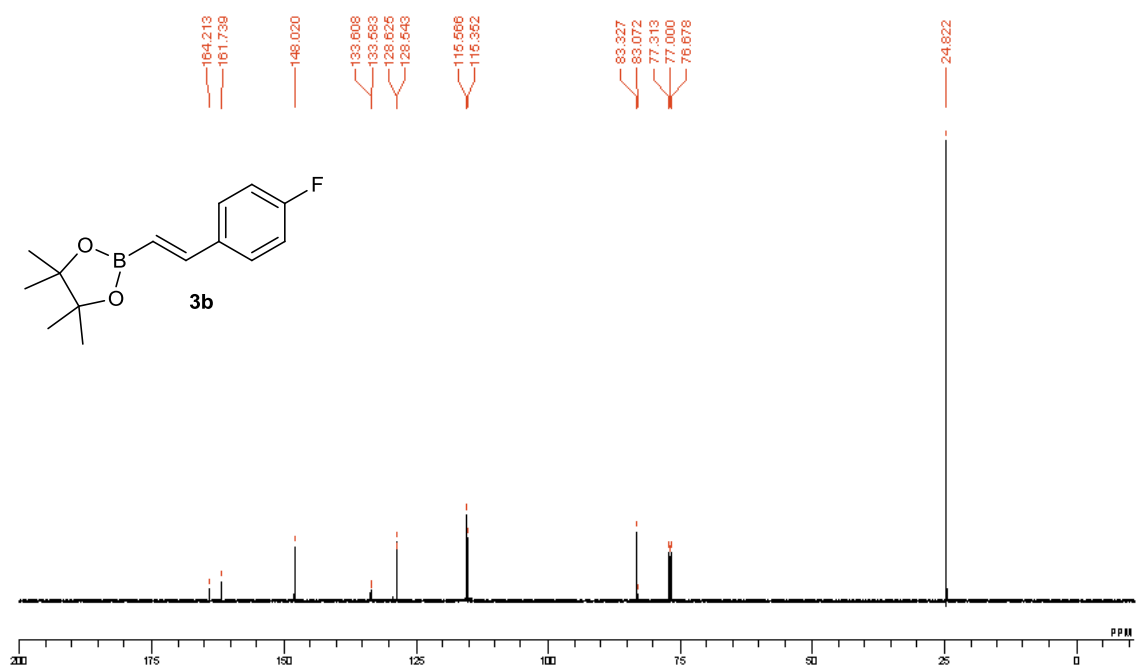

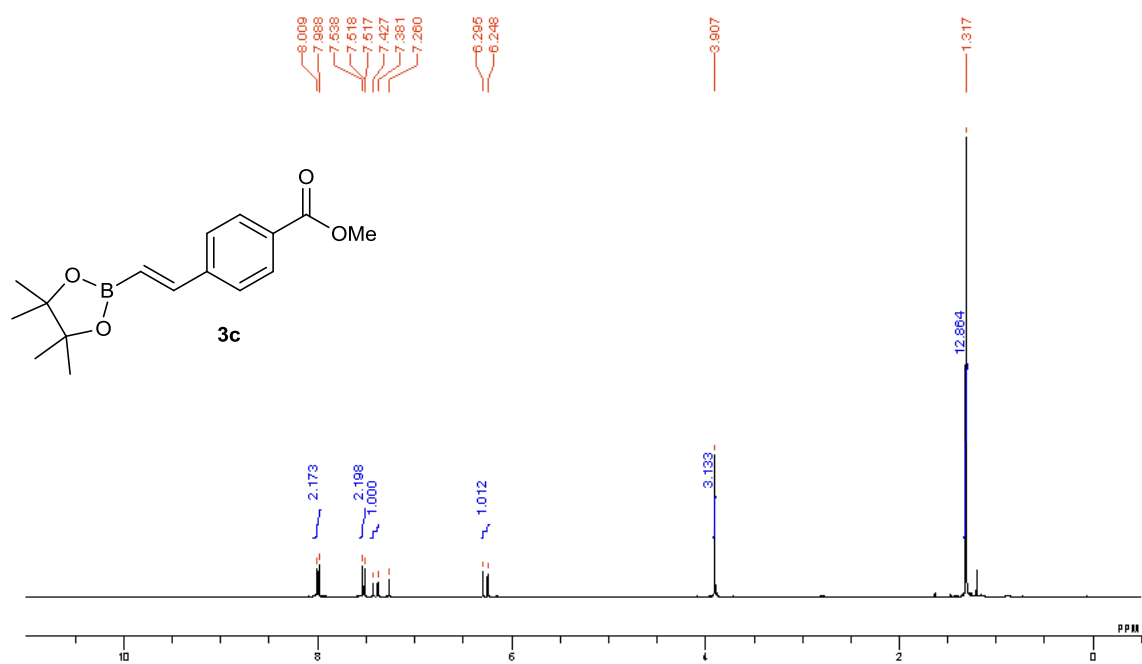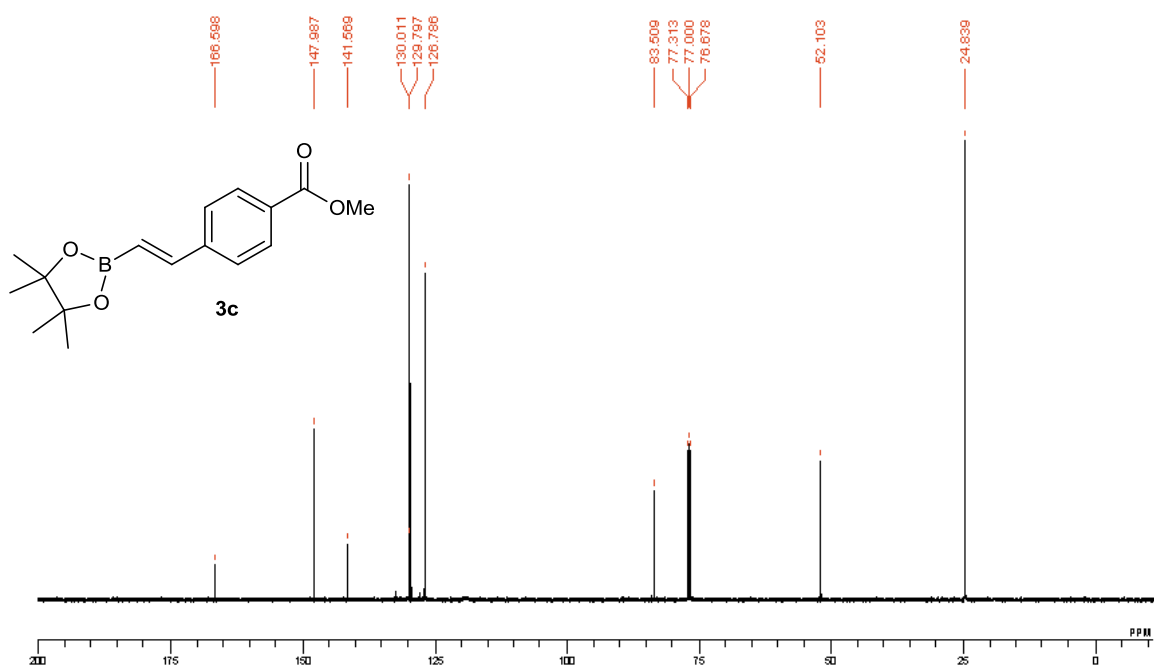



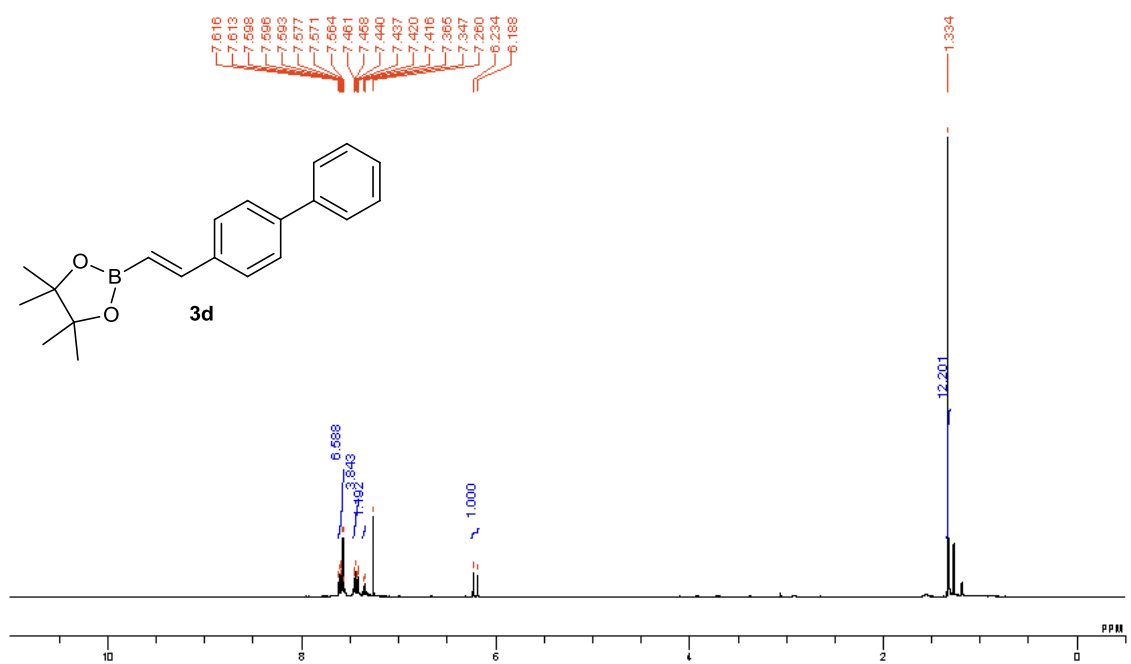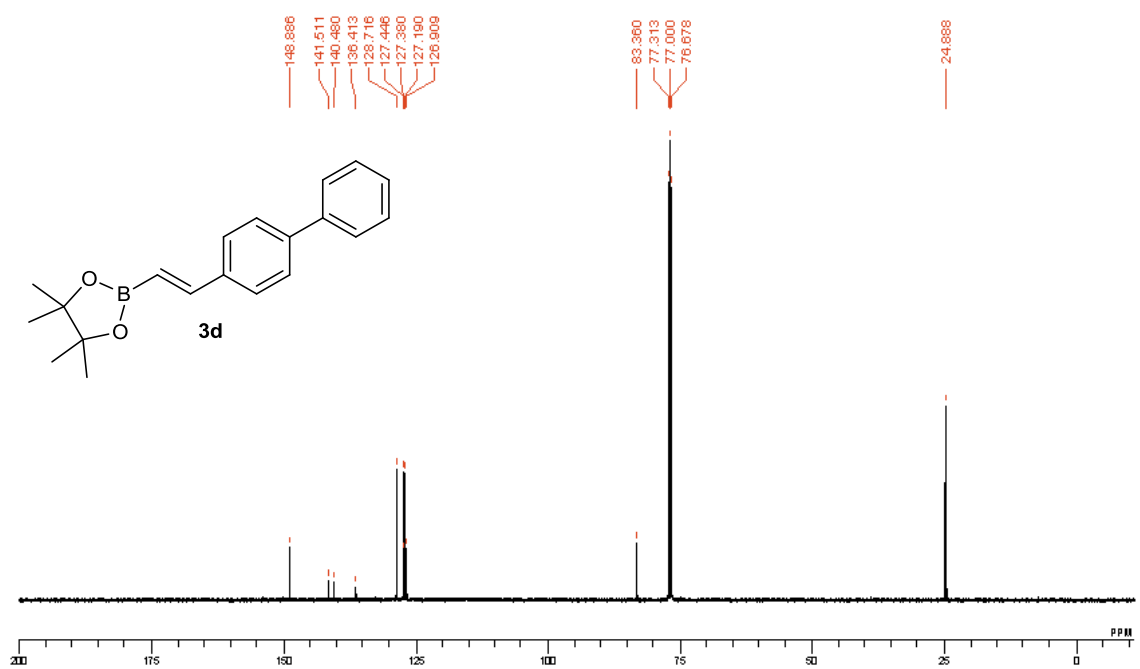

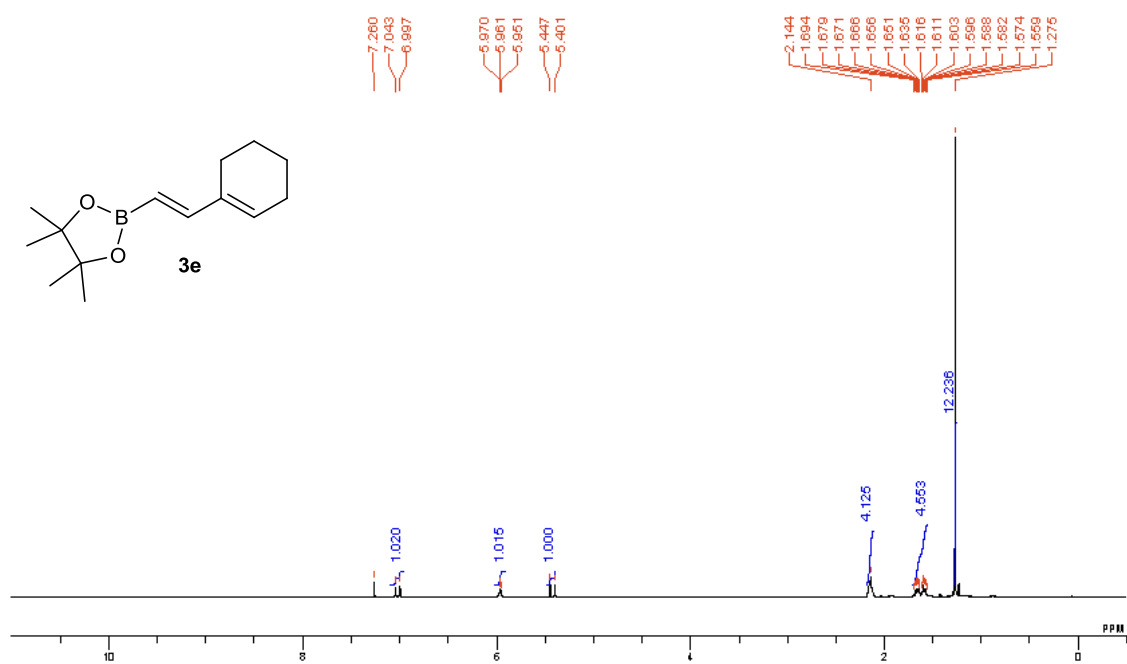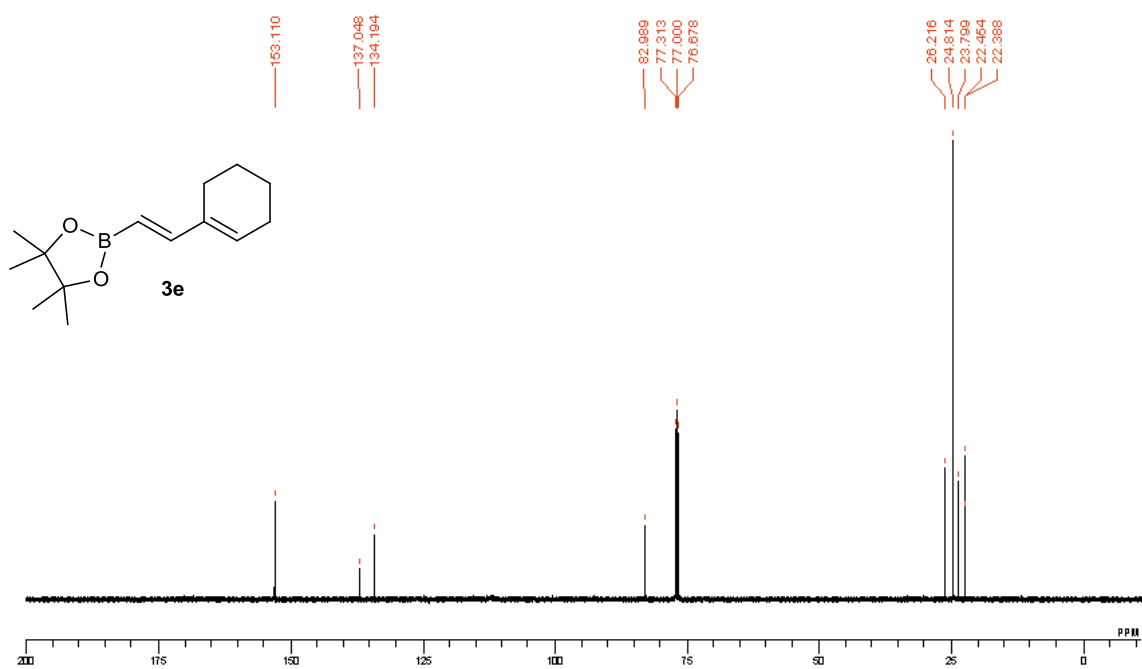

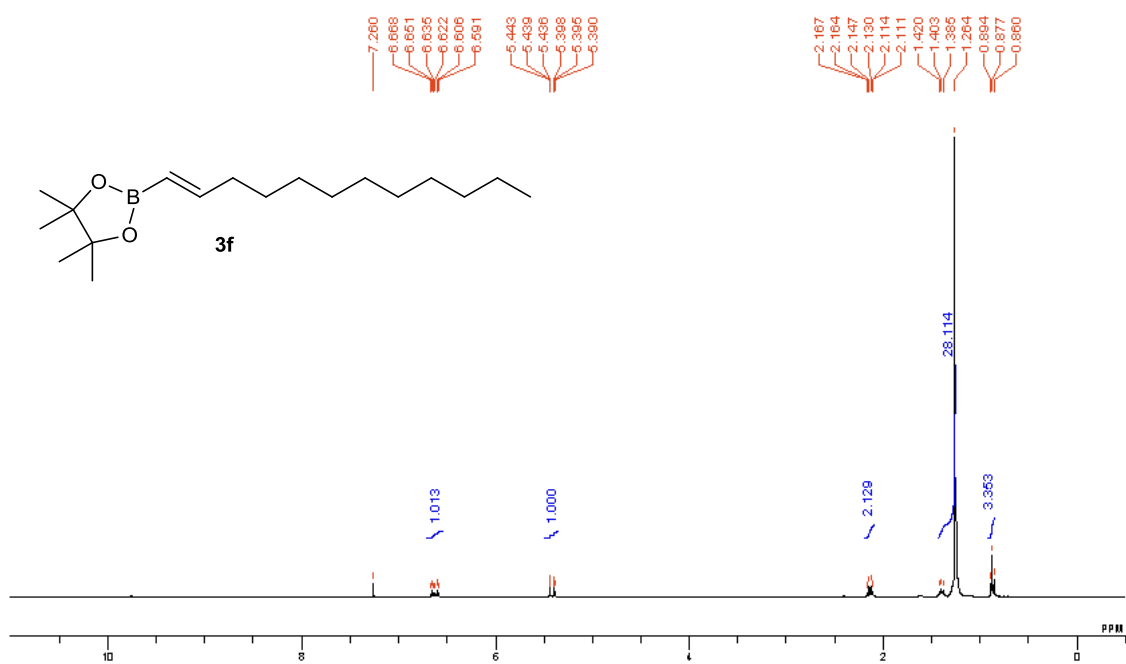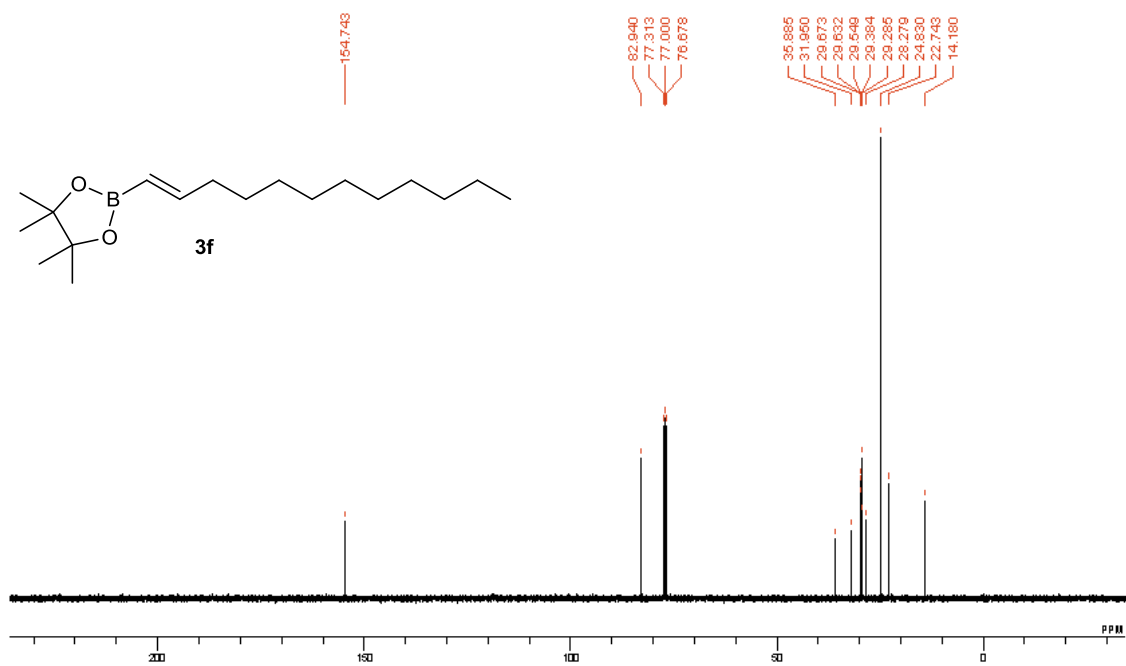

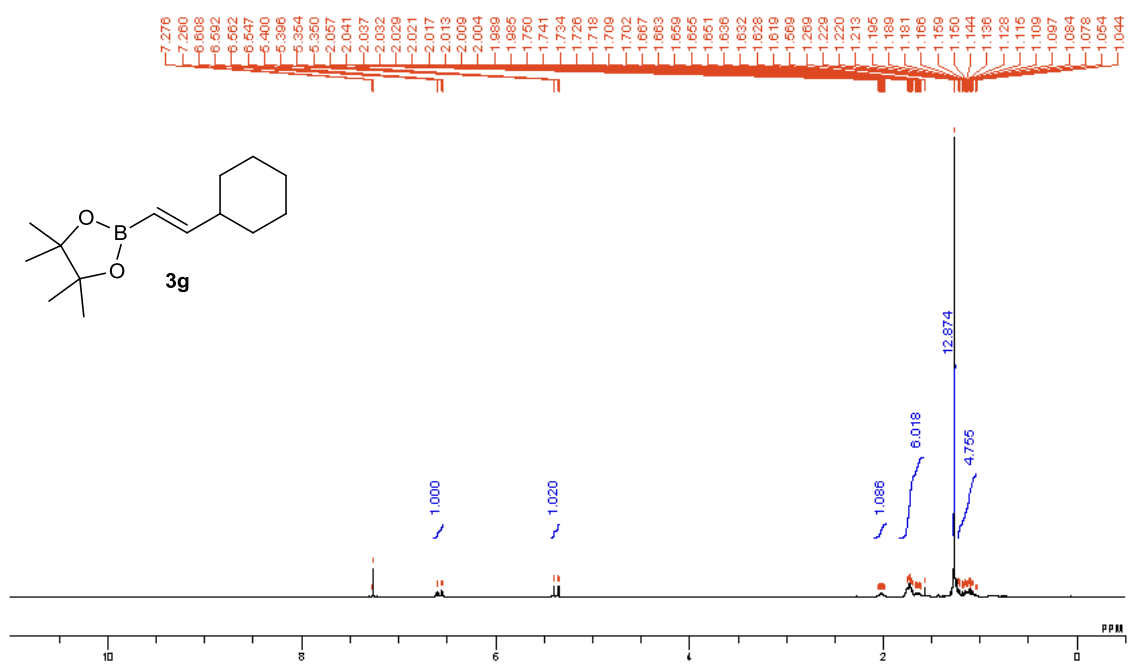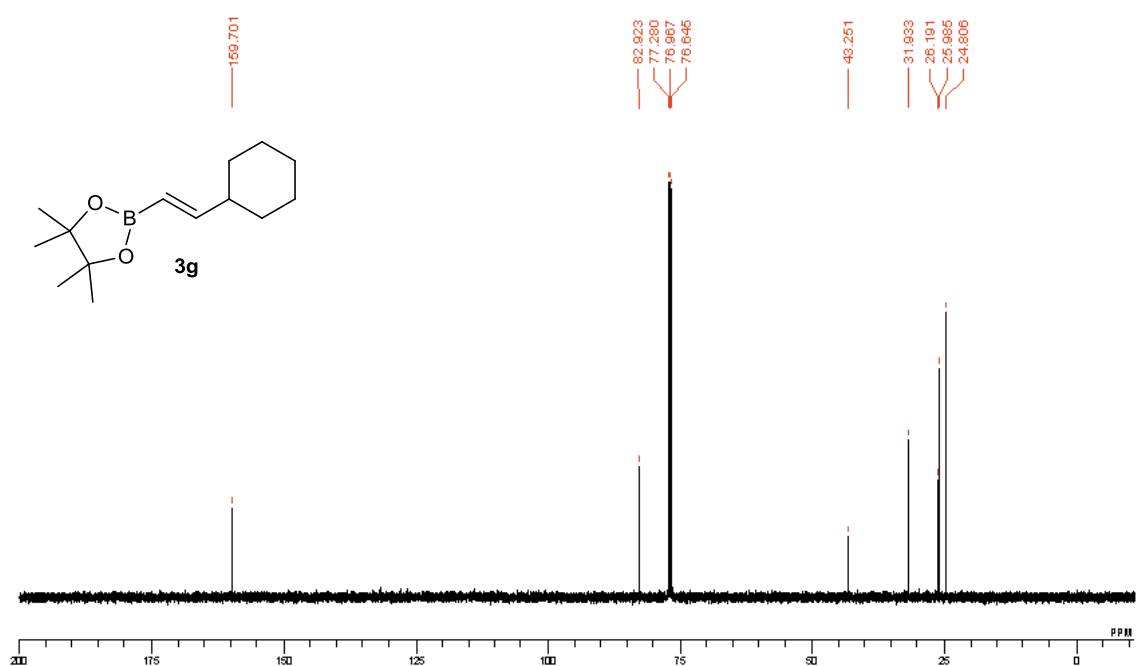

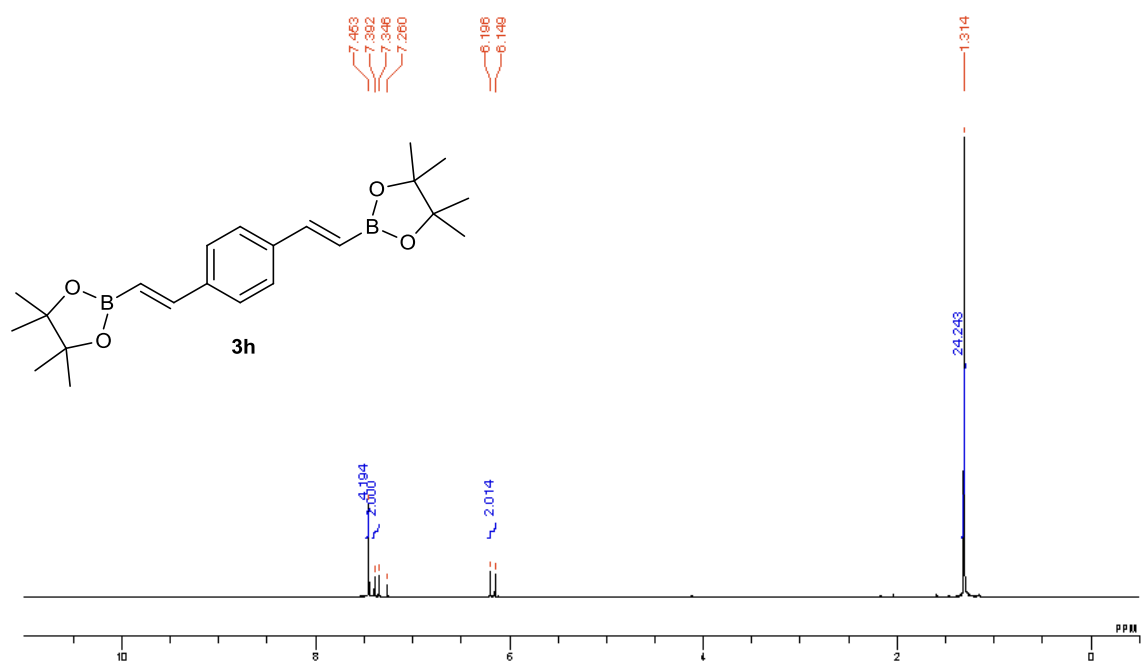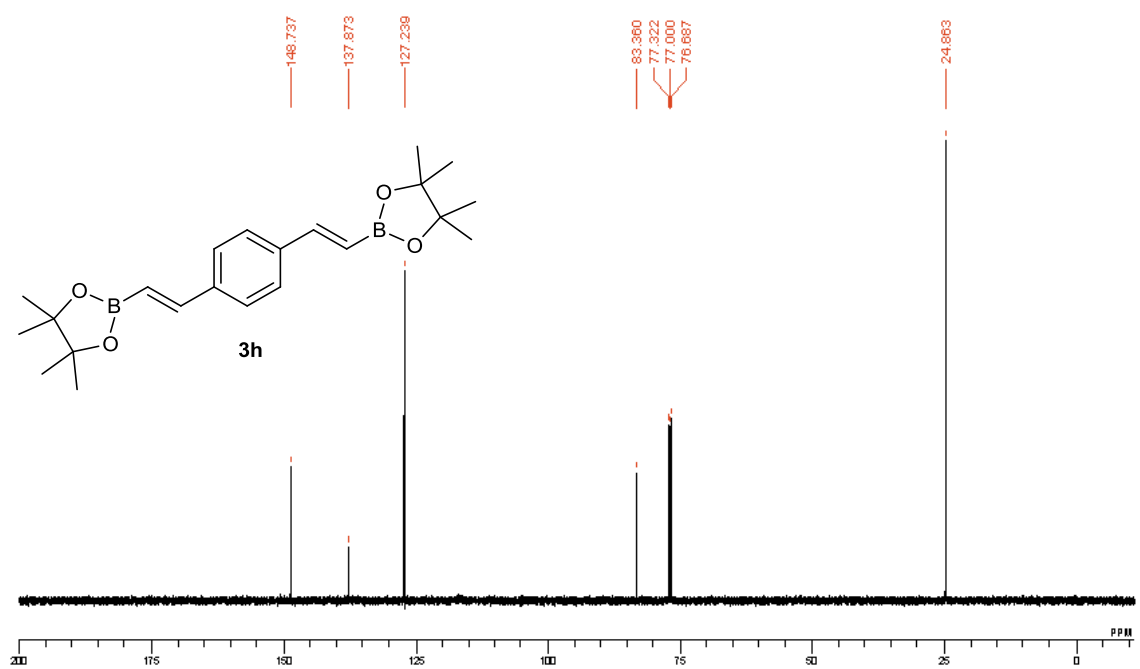

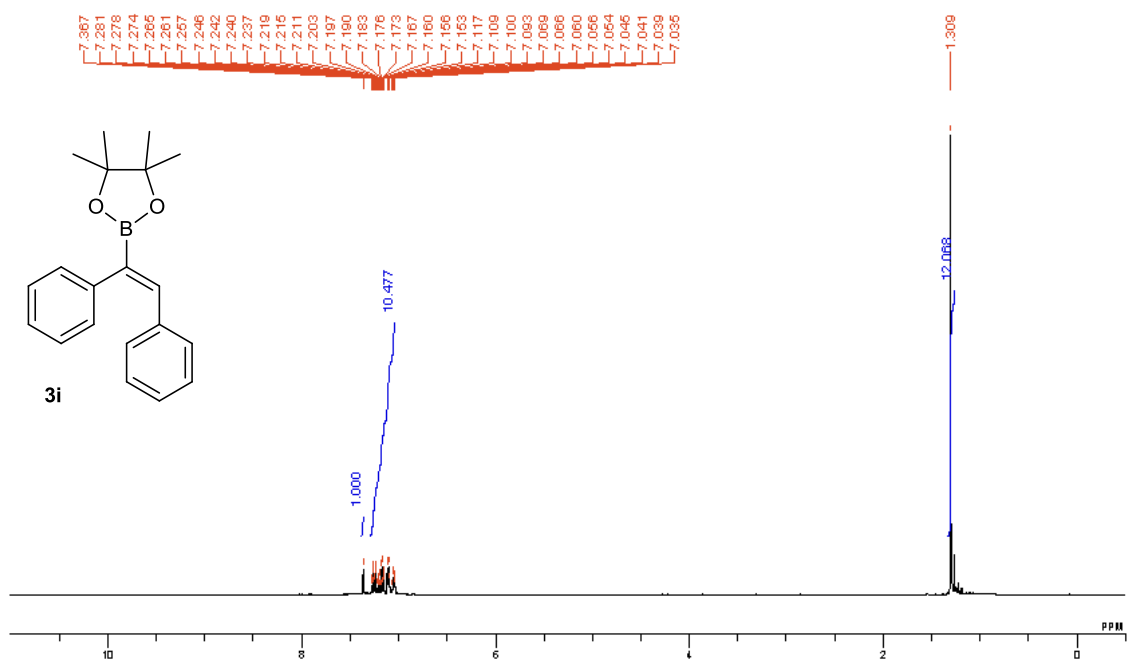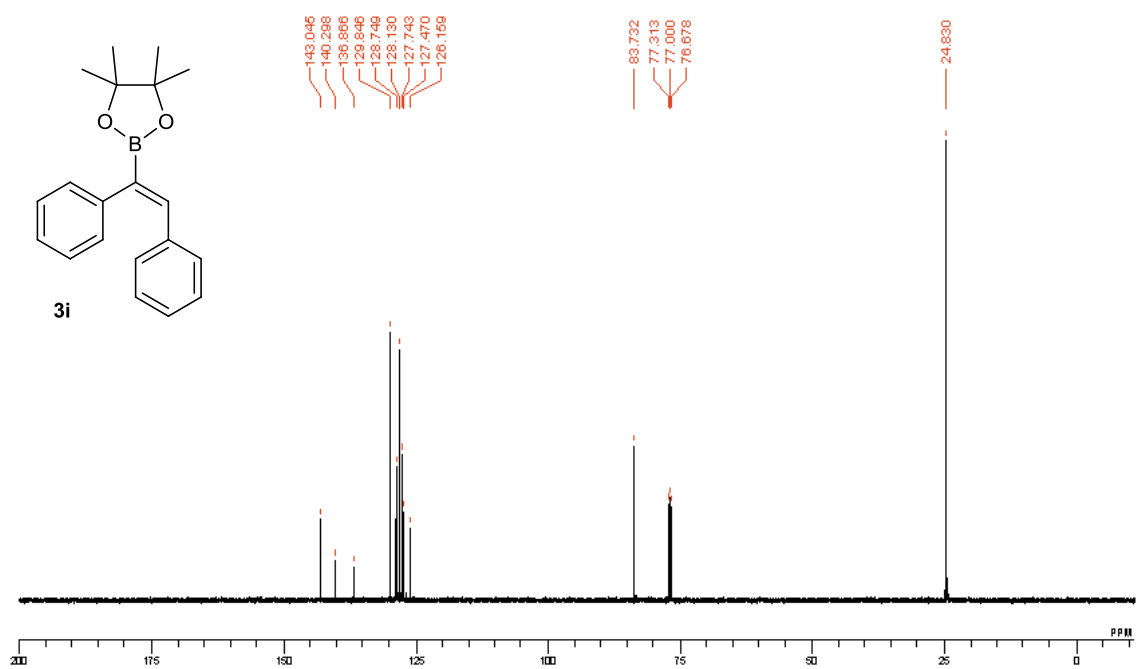

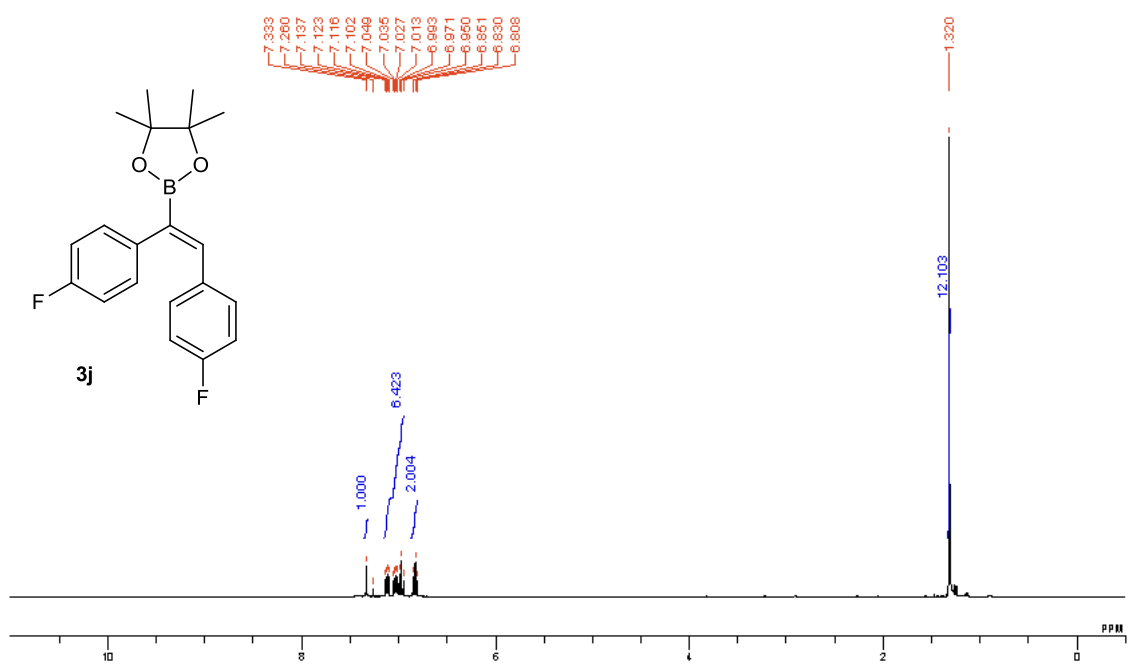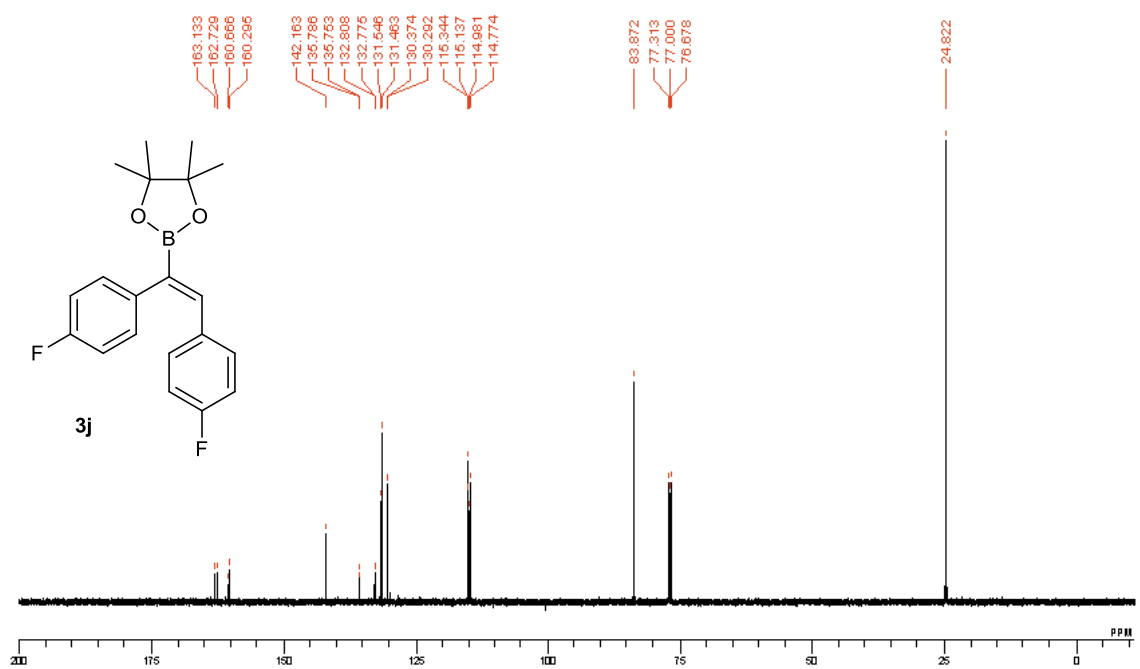

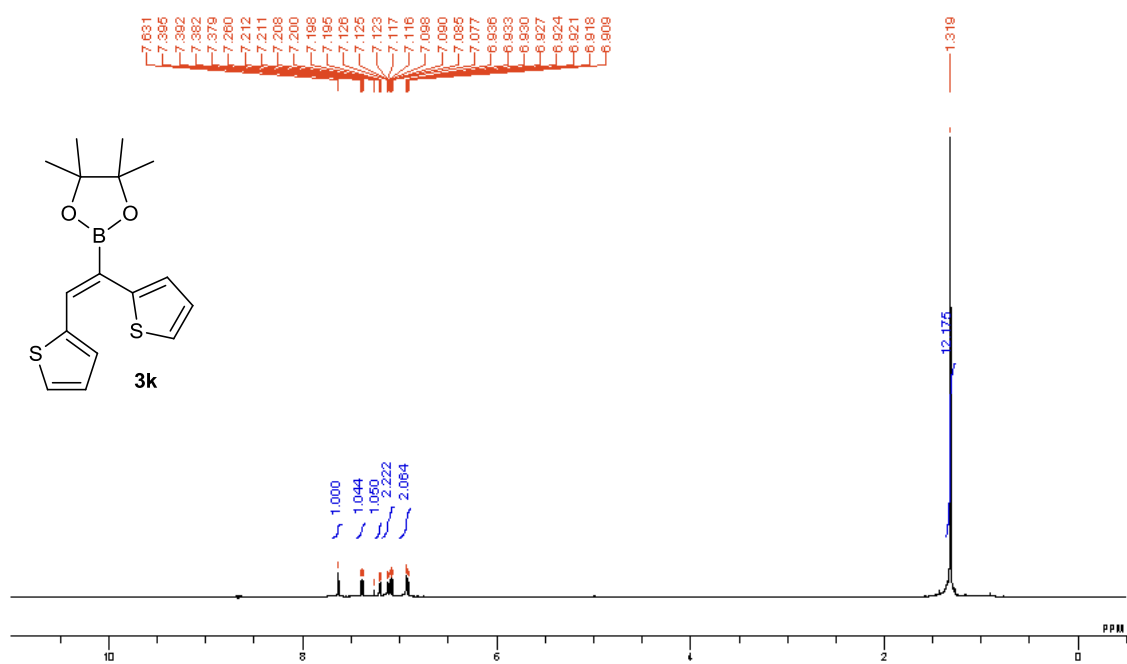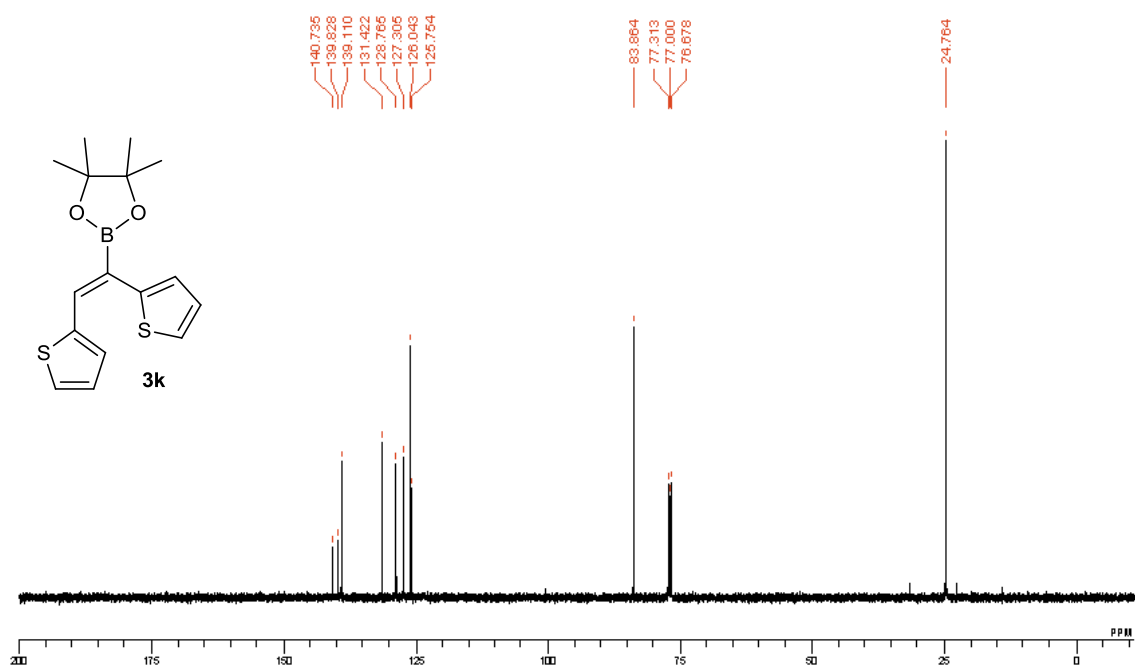



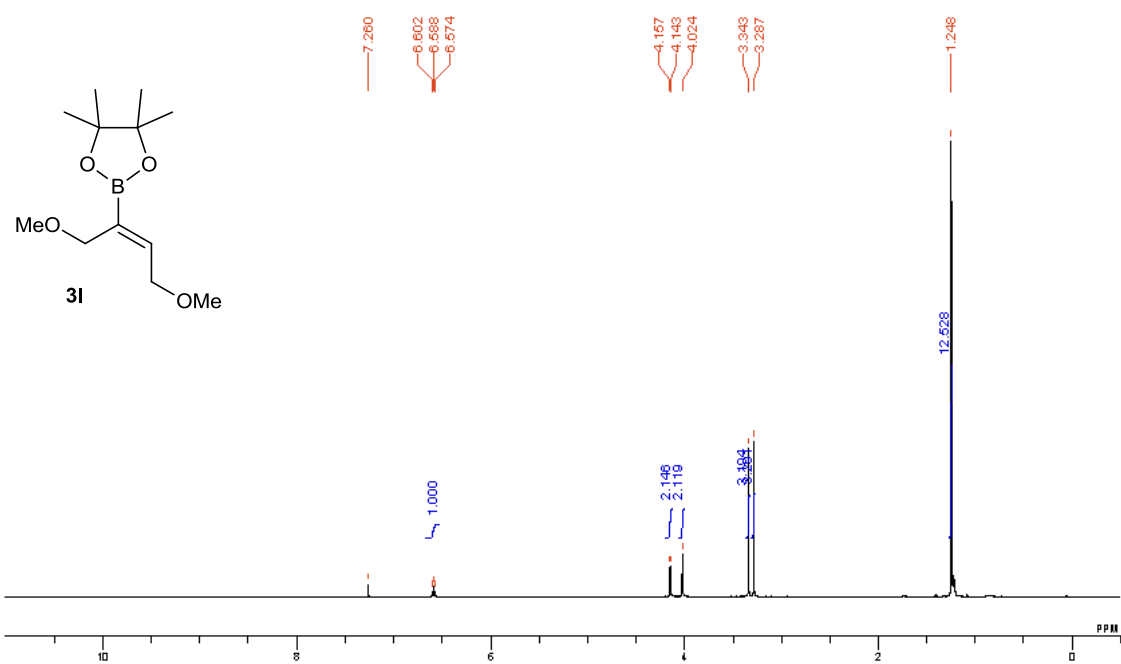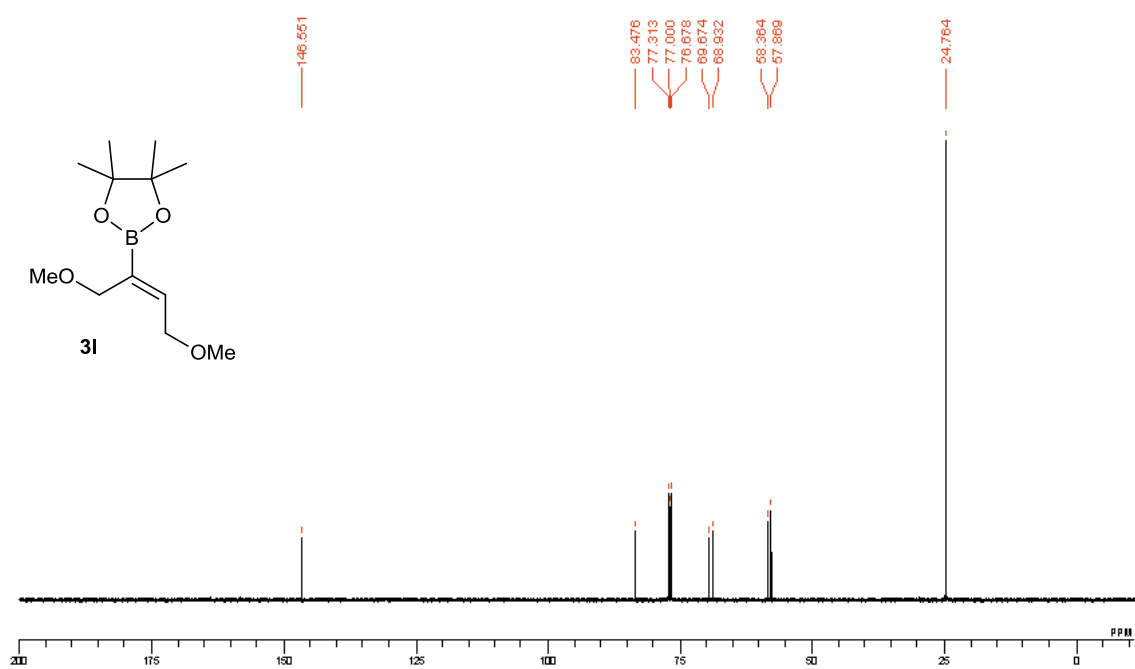

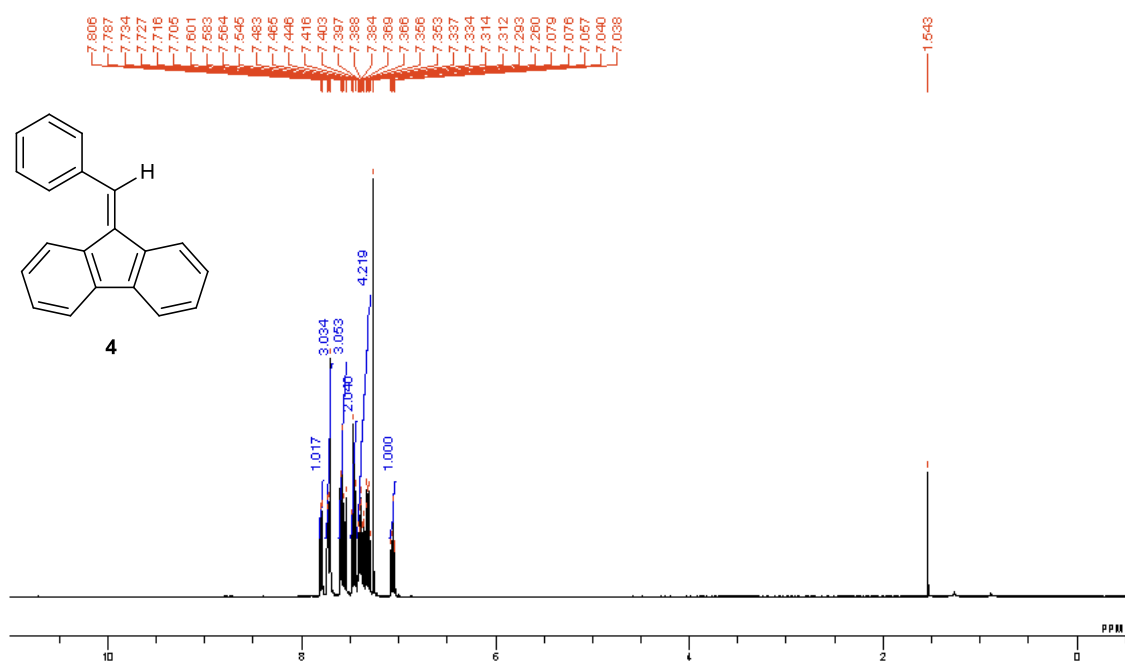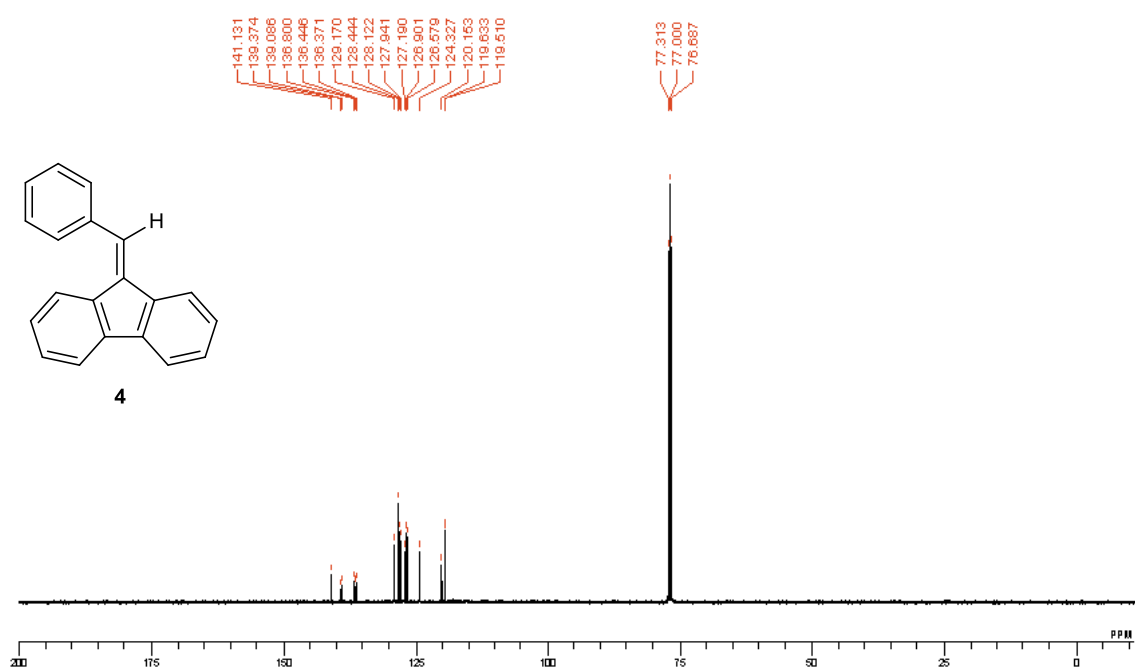

Supplement: Supplementary file 1 [file 3893875]
